# Supplementary material
Source: PubMed Central journal article supplement (PMC6052150)

**a** K01667\_trypthophanase [EC:4.1.99.1]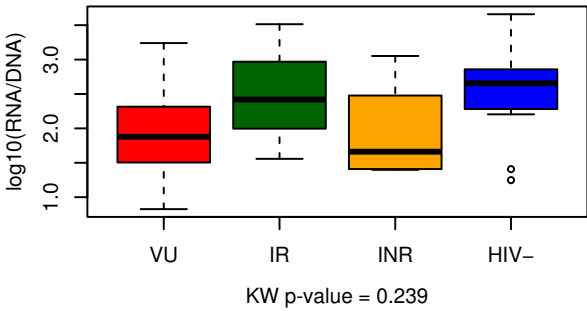

K01667\_trypthophanase [EC:4.1.99.1]

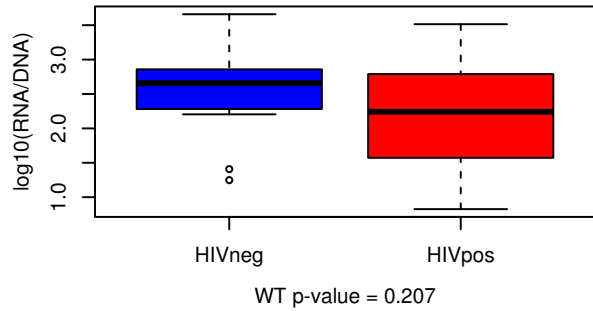**b** cutD\_Choline TMA-Lyase activating protein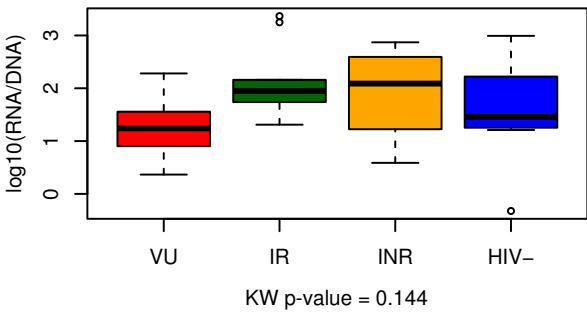

cutD\_Choline TMA-Lyase activating protein

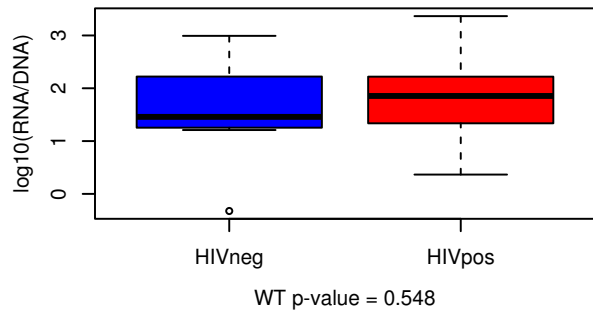**c** cutC\_Choline TMA-Lyase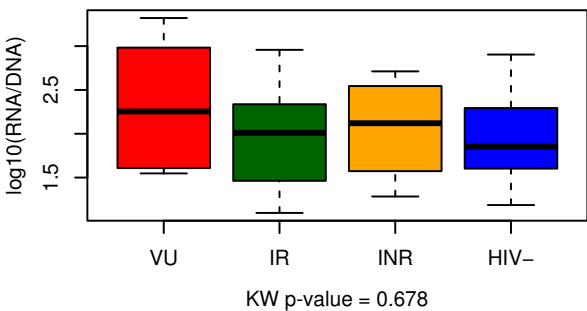

cutC\_Choline TMA-Lyase

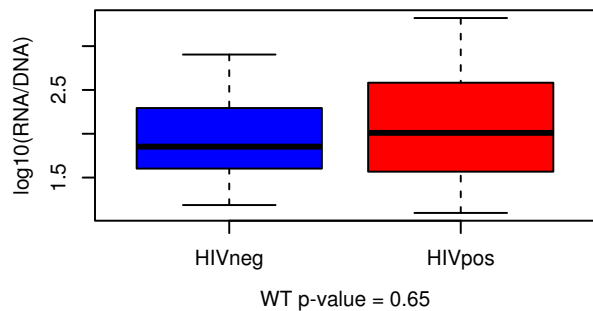

Supplement: 41396_2018_151_MOESM7_ESM.pdf [file 41396_2018_151_MOESM7_ESM.pdf]
