# Supplementary material
Source: PubMed Central journal article supplement (PMC6052150)
Supplement: 41396_2018_151_MOESM14_ESM.pdf [file 41396_2018_151_MOESM14_ESM.pdf]

## 1 **Supplementary Information**

2

### 3 **Supplementary Methods.**

#### 4 ***Total DNA and RNA extraction and sequencing***

5 Fecal samples were stored in RNA later (Life Technologies, Carlsbad, CA) at -80 °C  
6 until use. Total DNA was extracted as previously described (Serrano-Villar et al., 2017).  
7 Briefly, the samples, diluted in phosphate-buffered saline, were centrifuged at 2,000  
8 r.p.m. at 4 °C for 2 min to remove fecal debris. Total DNA was extracted from the  
9 pelleted cells (roughly 50 mg) with QIAamp DNA Stool Kit (Qiagen, Hilden, Germany)  
10 according to the manufacturer's instructions. The metagenomes were sequencing using  
11 both MiSeq platform (Illumina, Eindhoven, Netherlands) and Genome FLX Sequencer  
12 (Roche Diagnostics, Branford, CT, USA).

13 Total RNA from the pelleted cells (roughly 100 mg) was extracted using the RiboPure™  
14 Bacteria kit (Ambion, Austin, TX, USA) as described in (Pérez-Cobas et al., 2013) and  
15 then treated with Baseline-ZERO™ DNase (Illumina, Eindhoven, Netherlands). The  
16 rRNA removal was performed using Ribo-Zero Magnetic Kit (Bacteria) (Illumina,  
17 Eindhoven, Netherlands). Then, the rRNA-depleted RNA was processed with ScriptSeq  
18 V2 RNA-Seq Library Preparation kit (Illumina, Eindhoven, Netherlands) to generate the  
19 double strand cDNA and the sequencing libraries according to the manufacturer's  
20 instructions. The metatranscriptomes were sequenced using the Kit V3 (2x230 cycles)  
21 in MiSeq platform (Illumina, Eindhoven, Netherlands).

22 For the metagenome analysis, we sequenced an average 98 Mb per sample (total 9.5  
23 Gb) using a combination of Illumina and 454 sequencing technologies. The coverage of  
24 each metagenome was estimated using the Nonpareil software (Rodriguez-R and  
25 Konstantinidis, 2014) using the options (-T alignment -f fasta), resulting in a coverage  
26 mean of 42.04% (sd=17.09). The metatranscriptome was obtained in a subset of 41  
27 samples (8 VU, 13 IR, 6 INR and 14 HIV-). The total mRNA was purified and the  
28 cDNA sequenced, obtaining an average 16 Mb per sample (a total of 715 Mb).

29

#### 30 ***Initial processing, assembly and functional annotation***

31 Illumina paired-end sequences retrieved from metagenomic (DNAseq) and  
32 metatranscriptomic (RNAseq) sequences were trimmed for adapters and the transposase  
33 sequence using the cutadapt software (v1.6). Sequence artifacts and low quality reads

1

1

2

1 from the raw sequences were removed using the fastx\_artifacts\_filter software and the  
2 fastq\_quality\_trimmer (parameters: -t 20 -l 50) available into the fastxtoolkit. Then, we  
3 used the prinseq-lite.pl script (parameters: -min\_len 50 -min\_qual\_mean 20 -ns\_max\_n  
41 -trim\_qual\_left 20 -trim\_qual\_right 25 -trim\_qual\_type min -trim\_qual\_rule  
5 -trim\_qual\_window 5 -trim\_qual\_step 1) to trim the 5' end and the 3' ends of each  
6 sequence, removing the trimmed reads that did not achieve one of the following criteria:  
7 read length above the 170 nucleotides, mean quality score above 20 or contain less than  
8 the 1% of ambiguous base.

9 The possible reads derived from the host genome was removed using the deconseq.pl  
10 script (v0.4.3) using as reference the human genome (Human Reference GRCh38).

11

### 12 ***Taxonomic assignment***

13 First, we constructed our own non-redundant genome database. The sequences of the  
14 reference genomes from the species found in the gastrointestinal tract were downloaded  
15 from the HMP web site  
16 ([http://downloads.hmpdacc.org/data/reference\\_genomes/body\\_sites/Gastrointestinal\\_tra](http://downloads.hmpdacc.org/data/reference_genomes/body_sites/Gastrointestinal_tract.nuc.fsa)  
17 [ct.nuc.fsa](http://downloads.hmpdacc.org/data/reference_genomes/body_sites/Gastrointestinal_tract.nuc.fsa)). Similarly, all the reference genomes and the latest assemblies of the  
18 genomes of the species related to the HMP genome database were downloaded from  
19 NCBI RefSeq database (<ftp://ftp.ncbi.nlm.nih.gov/genomes/all>) using the  
20 assembly\_summary.txt file as a reference  
21 ([https://ftp.ncbi.nlm.nih.gov/genomes/refseq/bacteria/assembly\\_summary.txt](https://ftp.ncbi.nlm.nih.gov/genomes/refseq/bacteria/assembly_summary.txt)). The  
22 resulting database contains 1,113,533 sequence entries in 39, 537, 222, 120 bp. The  
23 sequences that share the same taxa-id were grouped in a fasta file. Each file was then  
24 compared against itself using megablast (parameters: blastn -task megablast  
25 -perc\_identity 95). Those sequences that share a 95% of sequence identity and an  
26 alignment that cover at least the 90% of the smallest of the sequences were clustered,  
27 taking as the reference the longest one. For this task, we excluded all the plasmid  
28 sequences from the database. The taxonomy of the clustered database was obtained  
29 using the acc\_taxid.zip, taxdump.zip files available on the NCBI website. The final  
30 genome database (Genomeclustdb) contains 2463 species, 76,478 sequence entries in  
31 110,545,961,079 bp.

32 The taxonomic assignation of the metagenomic and the metatranscriptomic sequences  
33 was carried out by mapping the unassembled sequences in the Genomeclustdb using

1blastn tool (v2.2.31 parameters: -task megablast -perc\_identity 75). Then, all reads  
2whose alignment length was below 100 nucleotides, or the percentage of identity was  
3below 75%, or e-value was above 0.00001, were discharged. The assignment criterion  
4was based by the read best-hit, prioritizing first the e-value, then the bit-score, the  
5percentage of identity and finally the alignment's length. In the case of two or more  
6database genomes contain the same best-hit values; the read coverage was divided by  
7the number of hits with the same score. We mapped the RNAseqs and the DNAseqs  
8against Genomeclustdb using the megablast software to calculate their relative  
9abundance.

10

### 11*Ecological, clustering, ordination and correlation analyses*

12All the analyses were conducted with custom Perl scripts and R statistical software  
13version 3.2.0 (R Development Core Team, 2011). Given the high-dimensional data and  
14to control the false discovery rate, we validated the statistical tests adjusting all p-values  
15using the Benjamini-Hochberg correction (library "stats", function "p.adjust") (BH  
16adjusted P-value).

17The abundance matrix retrieved from the taxonomic and functional annotations of the  
18DNAseq and RNAseq data were standardized by the total number of sequences. Then,  
19to avoid biases given species composition we normalize data using the Hellinger  
20transformation (library "vegan" function "decostand"). The Hellinger distance (library  
21"vegan" function "vegdist") and the Bray-Curtis index (library "vegan" function  
22"vegdist") were calculated from the abundance matrix from the functional and  
23taxonomic composition, respectively, to quantify the compositional dissimilarity  
24between two different communities. Similarly, the evenness within groups was  
25measured using the Pielou's index.

26The non-metric multidimensional scaling (NMDS) was performed to reduce  
27dimensionality in the taxonomic and functional distance matrix (library "vegan"  
28function "metaMDS"). The clustering analysis for the species and functional abundance  
29profiles was performed using the Partitioning Around Medoids (PAM) algorithm  
30(library "cluster", function "pam"). The optimal cluster configuration was the one that  
31maximizes the silhouette index (library "cluster", function "silhouette"). The  
32hierarchical clustering was done using the ward method (library "stats", function  
33"hclust", method "ward").

1To statistically assess the effect of the environmental factors on the bacterial and  
2functional composition, a multivariate analysis of variance based on dissimilarity tests  
3(ADONIS) was applied as implemented in the vegan library in R package (library  
4“Vegan” function “adonis”).

5All the correlation analyses were performed using the Spearman's rank correlation  
6coefficient (library “stats”, function “cor.test”).

7To evaluate differences between groups in continuous variables, we used the Kruskal–  
8Wallis test. The pairwise comparisons of continuous variables were analyzed using  
9Wilcoxon rank-sum test or T-student test.

10

### 11 ***Association between taxonomic and functional biomarkers***

12The putative associations between the pathways and species biomarkers were estimated  
13by means of Generalized Linear Models (GLM). The GLM was estimated setting as the  
14response variable the pathway abundance and as the predictors the species matrix. In  
15order to avoid over-fitting, each model was cross-validated 54 times and the least  
16absolute shrinkage and selection operator (lasso) was used to perform variable selection  
17and regularization (library “glmnet” function “cv.glmnet” alpha = 1). Additionally, the  
18Spearman's rank correlation coefficient (library “stats”, function “cor.test”) was  
19calculated for each of pairwise taxonomic-pathway variables selecting only those  
20associations whose adjusted p-value were below 0.05.

21Once the statistical associations were determined, we look whether the genomes of  
22those biomarker species contained the genes of the biomarker metabolic pathways from  
23which they had been associated. In order to achieve this, we downloaded the ORFs fasta  
24file from the NCBI RefSeq genomes database (<ftp://ftp.ncbi.nlm.nih.gov/genomes/all>)  
25from all the selected species. Then, the program makeblastdb (v2.2.31) produces  
26BLAST databases for each of the species ORF translated to amino acid sequences fasta  
27files. Finally, the blastp tool (v2.2.31) was used to search all the genes related to those  
28metabolic pathways in each genome ORF translated database. We took as a good hit if  
29the alignment's length were above 60 amino acids, the e-value were below to 0.000001  
30and if the percentage of identity were above the 60%.

31

### 32 ***Sensitive metabolic pathway detection***

1The remote homolog detection was carried out by Hidden Markov Models (HMM) for  
2each of the KEGG maps of the tryptophan metabolism (M00038) and the enzymes:  
3tryptophanase (K01667), catalase-peroxidase (K03781) and the o-aminophenol oxidase  
4(K20219). Briefly, we search a Pfam family (a collection of related protein regions) for  
5each of the enzymes mentioned above in the Pfam database (<http://pfam.xfam.org/>). The  
6Pfam database is a large collection of protein families. Each family consists of a curated  
7“seed” alignment, an alignment small set of representative sequences of the family, and  
8an HMM profile based on the seed alignment. We download the corresponding seed  
9alignment for each of the enzymes, mention before, to construct its respective HMM.  
10Those seed alignments are: PF06052 (KO: K00452), PF03301 (KO: K00453), PF01231  
11(KO: K00463), PF01494 (KO: K00486), K01432 (KO: PF07859), PF00266 (KO:  
12K01556), PF04909 (KO: K03392), PF04199 (KO: K07130), PF00171 (KO: K10217)  
13and PF07859 (KO: K14263).

14Each of the seed alignments was used to create an HMM using the hmmbuild (v3.1b2)  
15software. Finally, all the HMM from the tryptophan metabolism were used to detect  
16remote homologs in the ORFaanr database using the hmmsearch tool (v3.1b2). The  
17homology detection was given if the full sequence e-value were below 0.001.

18In a similar way, the enzymes related to the formation of trimethylamine (TMA) from  
19choline and L-carnitine; the oxygenase component YeaW/cntA (ACCESSION  
20APQ93983 and APP31394 respectively) and the reductase component YeaX/cntB  
21(ACCESSION WP\_001287026 and APQ93983 respectively) were searched into the  
22ORFaanr database using Blastp (v2.2.31+) (alignment coverage  $\geq 0.7$  and e-value  $<$   
230.00001).

24

### 25*Ecological and metabolic networks*

26To determine if both co-occurrence and metabolic networks met the properties of  
27biological networks, we assessed the topological properties using the package igraph in  
28the R environment. The connectivity distribution that was calculated applying  
29Kolmogorov-Smirnov test (function “power.law.fit” and “degree.distribution”)  
30(Kolmogorov Smirnov p-value  $> 0.1$ , represents the distribution of edge per node and  
31in a biological network fits a power law distribution. This feature means that few nodes  
32presented a high number of interactions while most nodes possessed sparse connections.  
33The small world effect was calculated using function “shortest.paths” and it indicated

1that the network presented a high number of clusters with shortcuts between them. In  
2order to test the consistency of the results of the ecological and the functional networks,  
3we simulated 10000 random networks using the Erdős–Rényi model (library igraph  
4function “erdos.renyi.game”). The probability of drawing an edge between two arbitrary  
5nodes was sampled from a random distribution (mean = 0.5, sd = 0.3) for each of 10000  
6networks (Supplementary Table 1).

7Modularity is another important characteristic of the biological networks. The modules  
8or clusters represent link-dense areas separated by regions of low connectivity. We used  
9the “walktrap community” algorithm from the igraph R package to define modules in  
10the co-occurrence network and to obtain the modularity coefficient. The taxonomic  
11composition of such modules was plotted as bar plots (R function “barplot”).

12The network statistics, betweenness, degree and eigenvector centrality, were calculated  
13for both ecological and metabolic networks. The degree centrality is the average of the  
14numbers of edges per species and it was calculated using degree algorithm from igraph  
15library. While betweenness centrality is a measure of centrality based on shortest paths,  
16eigenvector centrality measures the relevance of a node based on the concept that  
17connections to highly connected nodes contribute more to the score of the node in  
18question than equal connections to low connecting nodes. We used the “betweenness”  
19and “evcent” algorithms from the igraph R package to determine betweenness and  
20eigenvector centrality, respectively.

21The network fragmentation is defined as the relative fraction of disconnected  
22compartments in a co-occurrence network. The fragmentation was calculated using the  
23number of clusters derived from the function “clusters” and the walktrap.community”.

24

### 25 ***Multiomic Bayesian network***

26The multiomic BN was estimated using the log normalized relative abundance of the  
27metagenome, metatranscriptome and metabolome data from the HIV-associated  
28microbiota. We reanalyzed the metabolic data described in Serrano-Villar et al. (2016a)  
29and Serrano-Villar et al. (2016b). The metabolite identity was confirmed comparing the  
30fragments that were obtained with the structure of the proposed compound in the  
31MS/MS spectra against a public database  
32(METLIN:[https://metlin.scripps.edu/metabolites\\_list.php](https://metlin.scripps.edu/metabolites_list.php)) or commercially available  
33standards. If the metabolite contains more than one annotation, we prioritized the

1KEGG metabolite annotation, otherwise, we select one from the most abundant  
2annotation of the METLIN database or we took one from the most abundant subclass  
3annotation of the Lipidomics Gateway database  
4(<http://www.lipidmaps.org/data/structure/>). The abundance matrix that we retrieved  
5from the reanalysis of the metabolomic data was standardized by the total number of  
6metabolites.

7The network was estimated using the hill-climbing score-based learning algorithm (R  
8library “bnlearn” function “hc”). The algorithm states the optimal network and in  
9consequence the “father” to “child” node relationships which maximizes the Bayes  
10information criterion (BIC). The whitelist option was used to define the set of arcs that  
11will be included in the model. For this task we performed a GLM using the Lasso  
12variable selection and regularization (library “glmnet” function “cv.glmnet” alpha = 1)  
13As response variables, we selected those RNAseq and DNaseq pathways, species and  
14metabolites that were overrepresented or underrepresented in HIV condition and as  
15predictor the clinical variables related to the markers of innate and T cell activation  
16variables, thymic function, and bacterial translocation as done in the multivariate  
17statistical framework MaAsLin pipeline. To avoid over-fitting problems, all the models  
18were validated by means of n-fold cross validation (library “glmnet” function  
19“cv.glmnet”). Additionally, we included all the Spearman correlation adjusted p-value  
20was above 0.01. We used the blacklist option (R library “bnlearn” function “hc”) to  
21exclude all the edges whose Spearman correlation adjusted p-value were above 0.1. The  
22quantile 95 of the BN node statistics was estimated using the R function quantile (R  
23library “stats function “quantile”).

24The function mb (R Package “bnlearn” function “mb”) was used to dissect all the  
25Markov Blankets to perform the statistical analysis and to plot the butanoate metabolism  
26Markov blanket. The size of each Markov Blanket was estimated counting the number  
27of nodes per Markov Blanket.

28

## 29References.

30R Development Core Team (2011) R: A language and environment for statistical  
31 computing. R Foundation for Statistical Computing. <http://www.R-project.org/>.

1Pérez-Cobas AE, Gosalbes MJ, Friedrichs A, Knecht H, Artacho A, Eismann K, et al.  
2 (2013). Gut microbiota disturbance during antibiotic therapy: a multi-omic  
3 approach. *Gut* **62**: 1591–1601.

4Rodriguez-R LM and Konstantinidis KT. (2014). Nonpareil: A redundancy-based  
5 approach to assess the level of coverage in metagenomic datasets. *Bioinformatics*  
6 **30**: 629-635.

7Serrano-Villar S, Rojo D, Martinez M, Deusch S, Vazquez-Castellanos J, Bargiela R, et  
8 al. (2016a). Gut Bacteria Metabolism Impacts Immune Recovery in HIV-infected  
9 Individuals. *EBioMedicine* **8**: 203–216.

10Serrano-Villar S, Rojo D, Martinez M, Deusch S, Vazquez-Castellanos J, Bargiela R, et  
11 al. (2016b). HIV infection results in metabolic alterations in the gut microbiota  
12 different from those induced by other diseases. *Scientific Reports* **6**: 26192.

13Serrano-Villar S, Vázquez-Castellanos JF, Vallejo A, Latorre A, Sainz T, Ferrando-  
14 Martínez S, et al. (2017). The Effects of Prebiotics on Microbial Dysbiosis,  
15 Butyrate Production and Immunity in HIV-Infected Subjects. *Mucosal Immunol*  
16 **10**:1279-1293.

17



## 1 Supplementary figure legends

### 2 Supplementary Figure 1. Comparison of the microbiota gene composition across

#### 3 HIV+ groups and uninfected subjects from metagenomics. (a) NMDS analysis of the

4 gene (KO) composition for VU (red), IR (green), INR (orange) and HIV- (blue)

5 individuals. The ellipses represent the optimal clustering configuration retrieved from

6 the PAM algorithm and their size encompasses the 70% of variance of the cluster. The

7 cluster configuration was validated using the ADONIS test with the four groups of the

8 cohort (P-value=0.001). (b) Linear discriminative (LDA) effect size LefSe analysis of

9 genes (KO) between HIV+ (red) and HIV- (blue) subjects, (c) VU (red) versus HIV-

10 (blue), (d) IR (green) versus HIV- (blue) and (e) INR (orange) versus HIV- (blue). The

11 cladogram represented the biomarkers of the upper hierarchical classes within the

12 KEGG database. VU, viremic untreated; IR, immunological responder; INR,

13 immunological non-responder.

14

### 15 Supplementary Figure 2. Species composition from metagenomic dataset. (a)

16 NMDS analysis of the taxonomic species composition. VU (red), IR (green), INR

17 (orange) and HIV- (blue) subjects are represented by ellipses corresponding to 70% of

18 samples; cluster configuration was validated using the ADONIS test for the four groups

19 of the cohort (P-value=0.002). (b) Linear discriminative analysis (LDA) effect size

20 LefSe analysis between HIV+ (red) and HIV- (blue) subjects. LDA scores (log 10) for

21 the most discriminative species in controls are represented on the positive scale (blue

22 bars); LDA-negative scores indicate enriched species in HIV+ subjects (red bars). VU,

23 viremic untreated; IR, immunological responder; INR, immunological non-responder.

24

### 25 Supplementary Figure 3. Comparison of microbiota gene composition across HIV+

#### 26 groups and uninfected subjects from metatranscriptomic dataset. (a) NMDS

27 analysis of the KO composition for VU (red), IR (green), INR (orange) and HIV- (blue)

28 individuals. The ellipses represent the optimal clustering configuration retrieved from

29 the PAM algorithm and their size encompasses the 70% of variance of the cluster.

30 Cluster configuration was validated using the ADONIS test for the four groups of the

31 cohort (P-value=0.001). (b) Linear discriminative analysis effect size LefSe analysis

32 between the HIV+ (in red) and HIV- (in blue) subjects. LDA scores (log 10) for the

33 most discriminative KO in HIV- are represented on the negative scale, whereas LDA-

1 positive scores indicate enriched pathways in HIV+ subjects. VU, viremic untreated; IR,  
2 immunological responder; INR, immunological non-responder.

3

4 **Supplementary Figure 4. Taxonomic abundance.** (a) Relative abundance of the most  
5 abundant genera from metagenomics (mean relative abundance > 0.05 and present in at  
6 least 70% of samples) and (b) from the metatranscriptomics. VU (red), IR (green), INR  
7 (orange) and HIV- (blue) subjects. Grey represents Euryarchaeota; pink, Actinobacteria;  
8 brown gradient, Bacteroidetes; blue gradient, Firmicutes; and green gradient,  
9 Proteobacteria. VU, viremic untreated; IR, immunological responder; INR,  
10 immunological non-responder.

11

12 **Supplementary Figure 5. Species composition from metatranscriptomic dataset.**  
13 Linear discriminative analysis (LDA) effect size LEfSe analysis between HIV+ (red)  
14 and HIV- (blue) subjects. LDA scores (log 10) for most discriminative species in  
15 controls are represented on positive scale (blue bars); LDA-negative scores indicated  
16 enriched species in HIV+ subjects (red bars).

17

18 **Supplementary Figure 6. Comparisons of gene expression level in HIV-infected**  
19 **and uninfected individuals.** (a) Tryptophanase. (b) Choline TMA-lyase activating  
20 protein. (c) Choline TMA-lyase. Differences between groups were assessed by Kruskal-  
21 Wallis test, while group pairwise comparison was set by the Wilcoxon signed-rank test.

22

23 **Supplementary Figure 7. Metabolic network.** Metabolic network retrieved from  
24 pathways inferred by ORF KEGG-annotation enzymes. Each enzyme of the network  
25 can be associated with several reactions, and each reaction can be involved with  
26 different enzymes. Nodes represent KEGG orthologous groups (KO); direct edges  
27 indicate that product metabolite of one enzyme is substrate for enzyme to which the  
28 edge is pointing. Blue: all KO biomarkers related to HIV- subjects; red, KO biomarkers  
29 related to the HIV condition.

30

31 **Supplementary Figure 8. HIV+ species centrality.** (a) Betweenness centrality, which  
32 quantifies the number of times a node acts as a bridge along shortest path between two  
33 other nodes. (b) Eigenvector centrality measures the influence of a node in a network by

1 assigning a weighted score that considers its own degree of centrality and the centrality  
2 of nodes from which it is connected. Nodes represent species belonging to Firmicutes  
3 (cyan), Bacteroidetes (orange), Actinobacteria (pink) and Proteobacteria (green) phyla.  
4 Only outlier species with quantile 95 are labeled in the boxplot.

5

6 **Supplementary Figure 9. Spearman correlation between LDA scores (log 10) of**  
7 **species biomarkers and corresponding centrality score.** (a) Betweenness centrality.  
8 (b) Eigenvector centrality. The regression line is represented in red. Correlations were  
9 set for HIV+ and HIV- species biomarkers independently. Species belong to Firmicutes  
10 (cyan), Bacteroidetes (orange), Actinobacteria (pink) and Proteobacteria (green) phyla.

11

12 **Supplementary Figure 10. Centrality of the KO biomarkers.** Betweenness, degree  
13 and eigenvector centrality for the HIV- (blue), HIV+ (red) KO biomarkers and the rest  
14 of the enzymes in the network (grey). The centrality values are expressed on a log scale.

15

16 **Supplementary Figure 11. HIV+ Bayesian network.** “Multiomic” Bayesian networks  
17 composed of the metagenomic data (blue nodes), metatranscriptomic data (green  
18 nodes), metabolomic data (pink circle nodes) and the clinical variables (gold square  
19 nodes) from the HIV+ subjects. The data from the metagenomic and metatranscriptomic  
20 included the information of the species relative abundance (circles) and pathway  
21 relative abundance (squares). The labels of the nodes represent over representation in  
22 HIV- subjects (blue label) or in HIV+ subjects (red label). Arrows indicate the  
23 conditional dependencies between variables. The Spearman correlation coefficient is  
24 represented by the arrow's color, blue if it is significantly positive (BH adjusted P-value  
25  $< 0.1$ ), red if it has a significantly negative correlation (BH adjusted P-value  $< 0.1$ ) or  
26 grey if it is non-significant.

27

28 **Supplementary Figure 12. Bayesian network statistics.** (a) Degree centrality, (b)  
29 number of nodes per Markov Blanket (MB) and (c) number of clinical variables within  
30 each MB for each component of the BN. The metagenomic and metatranscriptomic  
31 species (Sp\_DNA and Sp\_RNA respectively), the metagenomic and metatranscriptomic  
32 pathways (ko\_DNA and ko\_RNA respectively), the metabolites (Metabol) and the  
33 clinical variables (Clinic). Differences between groups were assessed by the Kruskal-

1Wallis test, while the pairwise comparison was set by the Wilcoxon signed-rank test.

2The centralities values are expressed on a log scale.

3

1Supplementary tables

2

3Supplementary Table 1. Network bootstrap P-value.

4

|                       | Mean Degree | Mean Betweenness | Mean Closeness | Mean Eigenvector centrality | <sup>a</sup> %Pos | <sup>b</sup> %Neg | <sup>c</sup> Ratio | <sup>d</sup> Modularity | <sup>e</sup> Number clusters>1 | <sup>f</sup> Transitivity | <sup>g</sup> Diameter | <sup>h</sup> Mean-short pathways | K-Smirnov P-value |
|-----------------------|-------------|------------------|----------------|-----------------------------|-------------------|-------------------|--------------------|-------------------------|--------------------------------|---------------------------|-----------------------|----------------------------------|-------------------|
| Co-occurrence network | *           | *                | *              | *                           | 0                 | 0                 | 0                  | 0                       | 0                              | 0                         | 0                     | 0                                | *                 |
| Enzimatic network     | *           | *                | *              | *                           | *                 | *                 | *                  | *                       | *                              | *                         | *                     | *                                | *                 |

5

6\* P-value <0.001

7(a) Percentage of edges with a statistically significant positive correlation

8(b) Percentage of edges with a statistically significant negative correlation

9(c) Ratio between the positive and negative correlations.

10(d) Modularity index retrieved from the modules estimate by the Walktrap community finding algorithm

11(e) Number of modules, estimate by the Walktrap community finding algorithm, that posses at least two nodes

12(f) Clustering coefficient of the network. measure of the degree to which nodes in a graph tend to cluster together.

1

2

1(g) Longest path between two vertices within the network

2(h) Average path length between any two nodes

3

4

5

6

**1Supplementary Table 2.** Relative abundance of the species with genes related to the tryptophan catabolism via the kynurenine pathway.

2

| DNA mapping species                  | VU (mean /sd)         | IR (mean /sd)       | INR (mean /sd)      | HIV- (mean /sd)     | K/T ratio<br>Spearman<br>correlation<br>index | P-value | BH adjusted<br>P-value * |
|--------------------------------------|-----------------------|---------------------|---------------------|---------------------|-----------------------------------------------|---------|--------------------------|
| Xanthomonas arboricola pruni         | 9.41e-05/6.5e-05      | 7.66e-05/ 3.57e-05  | 0.0001108/8.45e-05  | 7.61e-05 / 6.1e-05  | 0.280                                         | 0.041   | 0.222                    |
| Trichodesmium erythraeum             | 8.97e-05/6.94e-05     | 6.91e-05 /4.56e-05  | 9.77e-05 /6.18e-05  | 9.11e-05/6.69e-05   | 0.167                                         | 0.227   | 0.265                    |
| IMS101                               |                       |                     |                     |                     |                                               |         |                          |
| Streptomyces scabiei                 | 0.0001091/9.94e-05    | 8.52e-05 / 4.64e-05 | 0.000125 / 8.8e-05  | 0.0001094/8.81e-05  | 0.213                                         | 0.122   | 0.250                    |
| Pseudomonas putida                   | 0.0001933/0.0001906   | 0.0001985/0.0001281 | 0.0002391/0.000237  | 0.0001844/0.00015   | 0.173                                         | 0.211   | 0.265                    |
| Pseudomonas fluorescens              | 0.0001734 / 0.0001575 | 0.0001706/0.0001096 | 0.0001964/0.0001917 | 0.0001549/0.00012   | 0.204                                         | 0.140   | 0.250                    |
| Pseudomonas aeruginosa               | 0.0001707 / 0.0001523 | 0.0001658/0.0001028 | 0.0002052/0.0001739 | 0.0001493/0.000117  | 0.199                                         | 0.149   | 0.250                    |
| Nitrosococcus oceani<br>ATCC19707    | 0.0002297 / 0.000164  | 0.0002088/0.0001064 | 0.0002464/0.0001768 | 0.0002198/0.00014   | 0.194                                         | 0.161   | 0.250                    |
| Nitrosococcus halophilus Nc4         | 0.0001412 / 0.0001042 | 0.0001196/6.85e-05  | 0.0001532/0.0001356 | 0.0001245/0.00010   | 0.271                                         | 0.048   | 0.222                    |
| Neptuniibacter caesariensis<br>MED92 | 5.38e-05 / 5.39e-05   | 5.6e-05 / 4.18e-05  | 5.4e-05 / 5.33e-05  | 3.99e-05 / 3.99e-05 | 0.211                                         | 0.126   | 0.250                    |
| Methylocystis sp ATCC 49242          | 0.0001391 / 0.0001011 | 8.43e-05 / 4.64e-05 | 0.0001506 /7.82e-05 | 0.0001229/8.09e-05  | 0.171                                         | 0.216   | 0.265                    |
| Gemmatimonas aurantiaca              | 8.17e-05 / 6.32e-05   | 5.42e-05 / 3.16e-05 | 8.89e-05 / 4.56e-05 | 7.15e-05 / 6e-05    | 0.213                                         | 0.121   | 0.250                    |
| Erythrobacter sp SD 2                | 2.47e-05 / 2.95e-05   | 6e-06 / 1.19e-05    | 2.23e-05 / 2.76e-05 | 2.12e-05 / 2.01e-05 | 0.287                                         | 0.035   | 0.222                    |
| Erythrobacter litoralis              | 0.0001235/9.76e-05    | 7.31e-05 / 4.4e-05  | 0.0001265/6.67e-05  | 0.0001322/8.27e-05  | 0.134                                         | 0.334   | 0.338                    |
| Citromicrobium bathyomarinum         | 0.0001136/9.57e-05    | 6.87e-05 /4.21e-05  | 0.0001276/6.37e-05  | 0.0001259/8.17e-05  | 0.133                                         | 0.338   | 0.338                    |

1

| RNA mapping species                      | VU (mean/sd)       | IR (mean/sd)        | INR (mean/sd)     | HIV- (mean/sd)    | K/T ratio<br>Spearman<br>correlation<br>index | P-value | BH adjusted<br>P-value * |
|------------------------------------------|--------------------|---------------------|-------------------|-------------------|-----------------------------------------------|---------|--------------------------|
| <i>Xanthomonas arboricola</i> pruni      | 9.5e-06 / 1.75e-05 | 7.4e-06 / 1.36e-05  | 1.7e-06/4.1e-06   | 1.32e-05/1.69e-05 | -0.030                                        | 0.868   | 0.935                    |
| <i>Trichodesmium erythraeum</i> IMS101   | 0 / 0              | 0 / 0               | 0 / 0             | 2.1e-06 / 7.7e-06 | 0.000                                         | 1.000   | 1.000                    |
| <i>Streptomyces scabiei</i>              | 1.2e-06 / 3.6e-06  | 2.1e-06 / 3e-06     | 0 / 0             | 6.1e-06/1.53e-05  | -0.162                                        | 0.367   | 0.728                    |
| <i>Pseudomonas putida</i>                | 5e-06 / 6e-06      | 1.08e-05/1.55e-05   | 1.4e-06/3.4e-06   | 9.6e-06/1.93e-05  | -0.075                                        | 0.679   | 0.792                    |
| <i>Pseudomonas fluorescens</i>           | 4.6e-06 / 7.4e-06  | 7.4e-06 / 1.24e-05  | 1.2e-06 / 3e-06   | 6.6e-06/1.27e-05  | -0.155                                        | 0.389   | 0.728                    |
| <i>Pseudomonas aeruginosa</i>            | 3.8e-06 / 5.7e-06  | 9.3e-06 / 1.38e-05  | 3e-06 / 4.7e-06   | 6.5e-06/1.06e-05  | -0.147                                        | 0.415   | 0.728                    |
| <i>Nitrosococcus oceani</i> ATCC19707    | 4.4e-06 / 8.7e-06  | 1.22e-05 / 2.21e-05 | 2.4e-06 / 6e-06   | 1e-05 / 2e-05     | -0.119                                        | 0.509   | 0.728                    |
| <i>Nitrosococcus halophilus</i> Nc4      | 3.8e-06 / 7.5e-06  | 1.04e-05 / 1.88e-05 | 2.1e-06 / 5.1e-06 | 7.6e-06 1.43e-05  | -0.118                                        | 0.512   | 0.728                    |
| <i>Neptuniibacter caesariensis</i> MED92 | 0 / 0              | 1.04e-05 / 1.66e-05 | 0 / 0             | 3e-06 / 8.2e-06   | -0.219                                        | 0.220   | 0.728                    |
| <i>Methylocystis</i> sp ATCC 49242       | 9.7e-06 / 1.01e-05 | 5.9e-06 / 7.1e-06   | 0 / 0             | 2.7e-06 / 5.4e-06 | 0.110                                         | 0.543   | 0.728                    |
| <i>Gemmatimonas aurantiaca</i>           | 3.3e-06 / 6.6e-06  | 4.2e-06 / 7e-06     | 1.8e-06 / 4.5e-06 | 6.5e-06 / 1.1e-05 | -0.172                                        | 0.339   | 0.728                    |
| <i>Erythrobacter</i> sp SD 2             | 7.7e-06 / 1.63e-05 | 1.02e-05 / 2.04e-05 | 0 / 0             | 7.8e-06/1.68e-05  | -0.161                                        | 0.372   | 0.728                    |
| <i>Erythrobacter litoralis</i>           | 6.1e-06 / 9.3e-06  | 8.6e-06 / 1.57e-05  | 0 / 0             | 8.6e-06/1.05e-05  | -0.151                                        | 0.400   | 0.728                    |
| <i>Citromicrobium bathyomarinum</i>      | 6e-06 / 9.1e-06    | 8.3e-06 / 1.84e-05  | 0 / 0             | 9.6e-06/1.24e-05  | -0.102                                        | 0.572   | 0.728                    |

2

3\*P-value adjusted using the Benjamini and Hochberg method

4

1



1Supplementary Table 3. GLM between the taxonomic and functional biomarkers.

2

| ko_pathway                                                         | Species                        | GLM Coefficient | Spearman<br>Correlation<br>index | Spearman P-<br>value | BH adjusted<br>P-value |
|--------------------------------------------------------------------|--------------------------------|-----------------|----------------------------------|----------------------|------------------------|
| Protein_export_ko03060                                             | Prevotella_salivae             | 0.630327914     | 0.708557271                      | 5.93E-009            | 3.17E-008              |
| Protein_export_ko03060                                             | Bacteroides_sp D20             | -0.000344       | -0.54473032                      | 2.80E-005            | 0.0000749              |
| Protein_export_ko03060                                             | Alistipes_finegoldii           | -0.00292209     | -0.364665523                     | 0.00700326           | 0.0095950              |
| RNA_degradation_ko03018                                            | Prevotella_salivae             | 0.489633859     | 0.748580141                      | 0                    | 0                      |
| RNA_degradation_ko03018                                            | Prevotella_copri               | 0.000982003     | 0.737145035                      | 0                    | 0                      |
| RNA_degradation_ko03018                                            | Bacteroides_pectinophilus      | 0.00491378      | 0.312826377                      | 0.02166191           | 0.0276129              |
| RNA_degradation_ko03018                                            | Bibersteinia_trehalosi         | -0.33164526     | 0.293629397                      | 0.03116270           | 0.0383202              |
| Epithelial_cell_signaling_in_Helicobacter_pylori_infection_ko05120 | Fermentimonas_caenicola        | 1.023448054     | 0.448348472                      | 0.00067385           | 0.0011784              |
| Epithelial_cell_signaling_in_Helicobacter_pylori_infection_ko05120 | Streptococcus_pseudopneumoniae | 2.067914861     | 0.396214039                      | 0.00301834           | 0.0045471              |
| Epithelial_cell_signaling_in_Helicobacter_pylori_infection_ko05120 | Odoribacter_splanchnicus       | -0.00151189     | -0.254507338                     | 0.06350798           | 0.0734245              |
| Vibrio_cholerae_pathogenic_cycle_ko05111                           | Prevotella_copri               | 0.000224926     | 0.686601868                      | 3.56E-008            | 1.72E-007              |
| Vibrio_cholerae_pathogenic_cycle_ko05111                           | Prevotella_salivae             | 0.057339171     | 0.662206975                      | 1.36E-007            | 6.13E-007              |
| Vibrio_cholerae_pathogenic_cycle_ko05111                           | Prevotella_ruminicola          | 2.115990035     | 0.640627435                      | 1.81E-007            | 7.89E-007              |
| Vibrio_cholerae_pathogenic_cycle_ko05111                           | Prevotella_melaninogenica      | 0.276605282     | 0.6355523                        | 2.43E-007            | 1.00E-006              |
| Vibrio_cholerae_pathogenic_cycle_ko05111                           | Acidaminococcus_intestini      | 0.012038269     | 0.560434534                      | 1.49E-005            | 4.19E-005              |
| Vibrio_cholerae_pathogenic_cycle_ko05111                           | Dialister_succinatiphilus      | 0.098358216     | 0.554640747                      | 1.89E-005            | 5.13E-005              |
| Vibrio_cholerae_pathogenic_cycle_ko05111                           | Bilophila_wadsworthia          | -0.019762194    | -0.539944814                     | 0.00002511           | 6.77E-005              |
| Vibrio_cholerae_pathogenic_cycle_ko05111                           | Bacteroides_eggerthii          | -0.004636945    | -0.50409758                      | 0.00012585           | 0.0002772              |
| Vibrio_cholerae_pathogenic_cycle_ko05111                           | Bifidobacterium_longum         | -0.002182973    | -0.490909091                     | 0.00019772           | 0.0004000              |
| Vibrio_cholerae_pathogenic_cycle_ko05111                           | Bacteroides_finegoldii         | -0.000509064    | -0.413607776                     | 0.00203953           | 0.0031685              |
| Vibrio_cholerae_pathogenic_cycle_ko05111                           | Ruminococcus_bicirculans       | -0.022716714    | -0.375314332                     | 0.00516630           | 0.0073382              |
| Vibrio_cholerae_pathogenic_cycle_ko05111                           | Coprobacillus_sp 8138FAA       | -0.063941187    | -0.304921283                     | 0.02496391           | 0.0312497              |

1

|                                                            |                              |              |              |            |           |
|------------------------------------------------------------|------------------------------|--------------|--------------|------------|-----------|
| Vibrio_cholerae_pathogenic_cycle_ko05111                   | Blautia_obeum                | -0.005948943 | -0.262511912 | 0.05541975 | 0.0647183 |
| Vibrio_cholerae_pathogenic_cycle_ko05111                   | Bacteroides_sp 325           | 0.008743212  | 0.252144082  | 0.06607022 | 0.0761339 |
| Alanine_aspartate_and_glutamate_metabolism_ko0250          | Prevotella_salivae           | 0.597740174  | 0.806899181  | 0          | 0         |
| Alanine_aspartate_and_glutamate_metabolism_ko0250          | Prevotella_copri             | 0.006633203  | 0.890909091  | 0          | 0         |
| Alanine_aspartate_and_glutamate_metabolism_ko0250          | Prevotella_fusca             | 0.827176859  | 0.870195445  | 1.30E-017  | 1.41E-016 |
| Alanine_aspartate_and_glutamate_metabolism_ko0250          | Prevotella_sp oral taxon 299 | 0.787709191  | 0.845978791  | 8.13E-016  | 7.45E-015 |
| Alanine_aspartate_and_glutamate_metabolism_ko0250          | Prevotella_intermedia        | 0.882819982  | 0.779715516  | 3.73E-012  | 2.60E-011 |
| Phenylalanine_tyrosine_and_tryptophan_biosynthesis_ko00400 | Prevotella_salivae           | 0.122106449  | 0.752391843  | 0          | 0         |
| Phenylalanine_tyrosine_and_tryptophan_biosynthesis_ko00400 | Prevotella_copri             | 0.002417975  | 0.828092243  | 0          | 0         |
| Phenylalanine_tyrosine_and_tryptophan_biosynthesis_ko00400 | Prevotella_fusca             | 0.358790813  | 0.841638161  | 1.58E-015  | 1.41E-014 |
| Phenylalanine_tyrosine_and_tryptophan_biosynthesis_ko00400 | Prevotella_dentalis          | 0.155941444  | 0.836258167  | 3.52E-015  | 3.06E-014 |
| Phenylalanine_tyrosine_and_tryptophan_biosynthesis_ko00400 | Prevotella_ruminicola        | 2.445823921  | 0.827009201  | 1.30E-014  | 1.03E-013 |
| Phenylalanine_tyrosine_and_tryptophan_biosynthesis_ko00400 | Prevotella_intermedia        | 2.023986526  | 0.77558943   | 5.72E-012  | 3.90E-011 |
| Phenylalanine_tyrosine_and_tryptophan_biosynthesis_ko00400 | Dialister_succinatiphilus    | 0.029707247  | 0.61982085   | 1.08E-006  | 3.97E-006 |
| Phenylalanine_tyrosine_and_tryptophan_biosynthesis_ko00400 | Bacteroides_eggerthii        | -0.001618533 | -0.566152087 | 1.18E-005  | 3.45E-005 |
| Phenylalanine_tyrosine_and_tryptophan_biosynthesis_ko00400 | Bacteroides_sp HPS0048       | -0.271486108 | -0.565770917 | 1.20E-005  | 3.47E-005 |
| Phenylalanine_tyrosine_and_tryptophan_biosynthesis_ko00400 | Bacteroides_salyersiae       | -0.002680836 | -0.538860301 | 3.52E-005  | 8.93E-005 |
| Phenylalanine_tyrosine_and_tryptophan_biosynthesis_ko00400 | Odoribacter_splanchnicus     | -0.021115026 | -0.502496665 | 0.00013307 | 0.0002894 |

|                                                                |                                 |              |              |            |           |
|----------------------------------------------------------------|---------------------------------|--------------|--------------|------------|-----------|
| is_ko00400                                                     |                                 |              |              |            |           |
| Phenylalanine_tyrosine_and_tryptophan_biosynthes<br>is_ko00400 | Bifidobacterium_sp_12147BF      | -0.006566333 | -0.485248511 | 0.00020002 | 0.0004000 |
| Phenylalanine_tyrosine_and_tryptophan_biosynthes<br>is_ko00400 | Bilophila_wadsworthia           | 0.005086793  | -0.370744814 | 0.00578439 | 0.0081496 |
| Phenylalanine_tyrosine_and_tryptophan_biosynthes<br>is_ko00400 | Ruminococcus_bicirculans        | -0.029883963 | -0.229935053 | 0.09440045 | 0.1073573 |
| Citrate_cycle_TCA_cycle_ko00020                                | Prevotella_salivae              | 0.642743553  | 0.756279779  | 0          | 0         |
| Citrate_cycle_TCA_cycle_ko00020                                | Acidaminococcus_intestini       | 4.92E-005    | 0.686983038  | 3.48E-008  | 1.71E-007 |
| Fructose_and_mannose_metabolism_ko00051                        | Prevotella_denticola            | 0.536892355  | 0.482560962  | 0.00021955 | 0.0004316 |
| Fructose_and_mannose_metabolism_ko00051                        | Prevotella_dentalis             | 0.085864011  | 0.47820565   | 0.00025492 | 0.0004821 |
| Fructose_and_mannose_metabolism_ko00051                        | Prevotella_copri                | 0.000296255  | 0.437926434  | 0.00103337 | 0.0017206 |
| Carbon_fixation_in_photosynthetic_organisms_ko0<br>0710        | Prevotella_salivae              | 0.836564665  | 0.770688012  | 0          | 0         |
| Carbon_fixation_in_photosynthetic_organisms_ko0<br>0710        | Prevotella_copri                | 0.003241563  | 0.765885268  | 0          | 0         |
| Carbon_fixation_in_photosynthetic_organisms_ko0<br>0710        | Prevotella_melaninogenica       | 0.066786524  | 0.793648178  | 8.21E-013  | 5.96E-012 |
| Carbon_fixation_in_photosynthetic_organisms_ko0<br>0710        | Bacteroides_stercoris           | -0.009513908 | -0.506155899 | 0.00011710 | 0.0002612 |
| Carbon_fixation_in_photosynthetic_organisms_ko0<br>0710        | Streptococcus_pneumoniae        | 2.91801112   | 0.495672105  | 0.00013834 | 0.0002955 |
| Carbon_fixation_in_photosynthetic_organisms_ko0<br>0710        | Clostridiales_bacterium_VE20214 | 1.224250705  | 0.493119878  | 0.00018352 | 0.0003791 |
| Carbon_fixation_in_photosynthetic_organisms_ko0<br>0710        | Alistipes_finegoldii            | -0.006455168 | -0.437392796 | 0.00104944 | 0.0017308 |
| Carbon_fixation_in_photosynthetic_organisms_ko0<br>0710        | Bibersteinia_trehalosi          | -1.310449328 | 0.270662686  | 0.04775561 | 0.0565880 |
| Oxidative_phosphorylation_ko00190                              | Prevotella_copri                | 0.000435808  | 0.542443301  | 3.06E-005  | 8.07E-005 |
| Oxidative_phosphorylation_ko00190                              | Prevotella_dentalis             | 0.01313649   | 0.531386305  | 3.56E-005  | 8.97E-005 |
| Oxidative_phosphorylation_ko00190                              | Bacteroides_fluxus              | 0.00358923   | 0.483666857  | 0.00025160 | 0.0004810 |
| Lipopolysaccharide_biosynthesis_ko00540                        | Prevotella_fusca                | 0.150236935  | 0.673539598  | 2.39E-008  | 1.22E-007 |
| Lipopolysaccharide_biosynthesis_ko00540                        | Prevotella_ruminicola           | 9.183981911  | 0.66860578   | 3.29E-008  | 0.0000001 |

|                                         |                            |              |              |            |           |
|-----------------------------------------|----------------------------|--------------|--------------|------------|-----------|
| Lipopolysaccharide_biosynthesis_ko00540 | Prevotella_copri           | 0.004909974  | 0.687059272  | 3.46E-008  | 1.71E-007 |
| Lipopolysaccharide_biosynthesis_ko00540 | Prevotella_salivae         | 0.364890392  | 0.671964932  | 8.15E-008  | 3.73E-007 |
| Lipopolysaccharide_biosynthesis_ko00540 | Prevotella_melaninogenica  | 0.851269653  | 0.641698989  | 1.71E-007  | 7.51E-007 |
| Lipopolysaccharide_biosynthesis_ko00540 | Bacteroides_fluxus         | 0.005905104  | 0.624623594  | 0.00000086 | 3.26E-006 |
| Lipopolysaccharide_biosynthesis_ko00540 | Prevotella_oralis          | -1.385958208 | 0.606900116  | 1.14E-006  | 4.15E-006 |
| Lipopolysaccharide_biosynthesis_ko00540 | Acidaminococcus_intestini  | 0.040889744  | 0.61661902   | 1.26E-006  | 4.52E-006 |
| Lipopolysaccharide_biosynthesis_ko00540 | Bifidobacterium_longum     | -0.043668026 | -0.581551363 | 6.14E-006  | 1.89E-005 |
| Lipopolysaccharide_biosynthesis_ko00540 | Riemerella_anatipestifer   | 0.158894854  | 0.533289653  | 3.30E-005  | 8.50E-005 |
| Lipopolysaccharide_biosynthesis_ko00540 | Bacteroides_stercoris      | 0.022152402  | -0.521250238 | 6.81E-005  | 0.0001613 |
| Lipopolysaccharide_biosynthesis_ko00540 | Bibersteinia_trehalosi     | 6.667541297  | 0.50484658   | 9.90E-005  | 0.0002266 |
| Lipopolysaccharide_biosynthesis_ko00540 | Fermentimonas_caenicola    | 2.671034976  | 0.49719101   | 0.00013097 | 0.0002866 |
| Lipopolysaccharide_biosynthesis_ko00540 | Parabacteroides_sp_HGS0025 | -1.983556429 | -0.493045463 | 0.00015198 | 0.0003225 |
| Lipopolysaccharide_biosynthesis_ko00540 | Bacteroides_plebeius       | -0.006023894 | -0.494034687 | 0.00017792 | 0.0003707 |
| Lipopolysaccharide_biosynthesis_ko00540 | Odoribacter_splanchnicus   | 0.006868554  | -0.490680389 | 0.00019925 | 0.0004000 |
| Lipopolysaccharide_biosynthesis_ko00540 | Dialister_succinatiphilus  | 0.34678993   | 0.483666857  | 0.00025160 | 0.0004810 |
| Lipopolysaccharide_biosynthesis_ko00540 | Bacteroides_eggerthii      | 0.012927647  | -0.475967219 | 0.00032332 | 0.0006049 |
| Lipopolysaccharide_biosynthesis_ko00540 | Bacteroides_sp_14_A        | -0.008273623 | -0.465878773 | 0.00038492 | 0.0007050 |
| Lipopolysaccharide_biosynthesis_ko00540 | Coprobacillus_sp_8_1_38FAA | -0.044760255 | -0.45458011  | 0.00055411 | 0.0009788 |
| Lipopolysaccharide_biosynthesis_ko00540 | Bacteroides_caccae         | 0.010611613  | -0.450962455 | 0.00070374 | 0.0012123 |
| Lipopolysaccharide_biosynthesis_ko00540 | Parabacteroides_sp_ASF519  | -0.114727764 | -0.437712139 | 0.00093308 | 0.0015762 |
| Lipopolysaccharide_biosynthesis_ko00540 | Alistipes_finegoldii       | 0.025365913  | -0.420163903 | 0.00170576 | 0.0027229 |
| Lipopolysaccharide_biosynthesis_ko00540 | Blautia_obeum              | -0.032163756 | -0.414751286 | 0.00197741 | 0.0030858 |
| Lipopolysaccharide_biosynthesis_ko00540 | Bacteroides_sp_HPS0048     | -0.552418218 | -0.36611397  | 0.00676863 | 0.0093102 |
| Lipopolysaccharide_biosynthesis_ko00540 | Coprococcus_sp_HPP0048     | -2.033517547 | -0.331400197 | 0.01436865 | 0.0187980 |
| Lipopolysaccharide_biosynthesis_ko00540 | Bacteroides_sp_3_2_5       | 0.156426259  | 0.303602058  | 0.02601956 | 0.0324545 |
| Lipopolysaccharide_biosynthesis_ko00540 | Bacteroides_pectinophilus  | -0.015602444 | -0.260377359 | 0.05748977 | 0.0669111 |
| N_Glycan_biosynthesis_ko00510           | Prevotella_copri           | 0.000175869  | 0.516142558  | 0.00008206 | 0.0001909 |
| N_Glycan_biosynthesis_ko00510           | Fermentimonas_caenicola    | 0.781727328  | 0.491985222  | 0.00015782 | 0.0003328 |
| N_Glycan_biosynthesis_ko00510           | Prevotella_dentalis        | 0.008432226  | 0.41325801   | 0.00189718 | 0.0030010 |
| N_Glycan_biosynthesis_ko00510           | Bacteroides_eggerthii      | -0.000986601 | -0.399504479 | 0.00296259 | 0.0045107 |
| N_Glycan_biosynthesis_ko00510           | Parabacteroides_sp_HGS0025 | -0.314962578 | -0.373900806 | 0.00535100 | 0.0075697 |
| N_Glycan_biosynthesis_ko00510           | Bacteroides_stercoris      | -0.001063969 | -0.314503526 | 0.02094032 | 0.0267913 |
| N_Glycan_biosynthesis_ko00510           | Coprococcus_sp_HPP0048     | -0.072767395 | -0.265921471 | 0.05195059 | 0.0608713 |

|                                                |                              |              |              |            |           |
|------------------------------------------------|------------------------------|--------------|--------------|------------|-----------|
| N_Glycan_biosynthesis_ko00510                  | Faecalibacterium_prausnitzii | -0.000823985 | -0.227901658 | 0.09744031 | 0.1100949 |
| Peptidoglycan_biosynthesis_ko00550             | Bacteroides_sp_D20           | -0.002507641 | -0.728606823 | 0          | 0         |
| Peptidoglycan_biosynthesis_ko00550             | Prevotella_salivae           | 0.771067843  | 0.812388031  | 0          | 0         |
| Peptidoglycan_biosynthesis_ko00550             | Prevotella_copri             | 0.00519608   | 0.837164094  | 0          | 0         |
| Peptidoglycan_biosynthesis_ko00550             | Prevotella_dentalis          | 1.382983757  | 0.872323209  | 8.70E-018  | 1.01E-016 |
| Peptidoglycan_biosynthesis_ko00550             | Prevotella_sp_oral_taxon_299 | 3.20351697   | 0.846514681  | 7.48E-016  | 7.04E-015 |
| Peptidoglycan_biosynthesis_ko00550             | Faecalibacterium_prausnitzii | 0.016487105  | 0.371755289  | 0.00591925 | 0.0082726 |
| Nicotinate_and_nicotinamide_metabolism_ko00760 | Prevotella_copri             | 0.002565147  | 0.765199161  | 0          | 0         |
| Nicotinate_and_nicotinamide_metabolism_ko00760 | Prevotella_sp_oral_taxon_299 | 1.188732661  | 0.727317452  | 4.70E-010  | 2.82E-009 |
| Nicotinate_and_nicotinamide_metabolism_ko00760 | Prevotella_denticola         | 0.81085705   | 0.725235907  | 5.56E-010  | 3.28E-009 |
| Nicotinate_and_nicotinamide_metabolism_ko00760 | Prevotella_fusca             | 0.120275338  | 0.716642772  | 1.10E-009  | 6.38E-009 |
| Nicotinate_and_nicotinamide_metabolism_ko00760 | Bacteroides_sp_D20           | -0.000525527 | -0.598170383 | 2.94E-006  | 9.66E-006 |
| Nicotinate_and_nicotinamide_metabolism_ko00760 | Bacteroides_sp_HPS0048       | -0.072662376 | -0.462321327 | 0.00049765 | 0.0008973 |
| One_carbon_pool_by_folate_ko00670              | Prevotella_salivae           | 0.81149853   | 0.591614256  | 3.95E-006  | 0.0000126 |
| One_carbon_pool_by_folate_ko00670              | Bacteroides_sp_3_1_23        | -0.033884814 | -0.487173623 | 0.00022403 | 0.0004379 |
| One_carbon_pool_by_folate_ko00670              | Prevotella_oralis            | 0.785144755  | 0.468924719  | 0.00034816 | 0.0006444 |
| One_carbon_pool_by_folate_ko00670              | Bacteroides_caccae           | -0.001178167 | -0.39310082  | 0.00349279 | 0.0051437 |
| [Metabolism_of_Other_Amino_Acids]              | Prevotella_salivae           | 0.361960852  | 0.755441205  | 0          | 0         |
| D_Alanine_metabolism_ko00473                   |                              |              |              |            |           |
| Metabolism Metabolism_of_Other_Amino_Acids     | Prevotella_copri             | 0.012571451  | 0.839146179  | 0          | 0         |
| D_Alanine_metabolism_ko00473                   |                              |              |              |            |           |
| Metabolism Metabolism_of_Other_Amino_Acids     | Prevotella_dentalis          | 0.493603635  | 0.827394724  | 1.23E-014  | 9.99E-014 |
| D_Alanine_metabolism_ko00473                   |                              |              |              |            |           |
| Metabolism Metabolism_of_Other_Amino_Acids     | Bacteroides_fluxus           | 0.047915676  | 0.673413379  | 7.54E-008  | 3.50E-007 |
| D_Alanine_metabolism_ko00473                   |                              |              |              |            |           |
| Metabolism Metabolism_of_Other_Amino_Acids     | Parabacteroides_sp_ASF519    | -0.166124553 | -0.433898983 | 0.00104591 | 0.0017308 |
| D_Alanine_metabolism_ko00473                   |                              |              |              |            |           |
| Terpenoid_backbone_biosynthesis_ko00900        | Bacteroides_sp_D20           | -0.000990142 | -0.760853821 | 0          | 0         |
| Terpenoid_backbone_biosynthesis_ko00900        | Prevotella_copri             | 0.004773795  | 0.897846388  | 0          | 0         |
| Terpenoid_backbone_biosynthesis_ko00900        | Prevotella_dentalis          | 1.547405825  | 0.90693648   | 3.63E-021  | 4.35E-020 |
| Terpenoid_backbone_biosynthesis_ko00900        | Prevotella_sp_oral_taxon_299 | 0.895389824  | 0.863663158  | 4.29E-017  | 4.52E-016 |
| Terpenoid_backbone_biosynthesis_ko00900        | Bacteroides_sp_4_1_36        | -0.000347414 | -0.708557271 | 5.93E-009  | 3.17E-008 |
| Terpenoid_backbone_biosynthesis_ko00900        | Fermentimonas_caenicola      | 6.137082373  | 0.631086934  | 3.12E-007  | 1.25E-006 |

|                                         |                            |              |              |            |           |
|-----------------------------------------|----------------------------|--------------|--------------|------------|-----------|
| Terpenoid_backbone_biosynthesis_ko00900 | Bacteroides_clarus         | -0.04616053  | -0.61623785  | 1.28E-006  | 4.55E-006 |
| Terpenoid_backbone_biosynthesis_ko00900 | Bacteroides_sp_14_A_       | -0.007914154 | -0.560541375 | 0.00001042 | 3.10E-005 |
| Terpenoid_backbone_biosynthesis_ko00900 | Bacteroides_salyersiae     | -0.011945584 | -0.509738898 | 0.00010319 | 0.0002347 |
| Zeatin_biosynthesis_ko00908             | Prevotella_copri           | 0.001080912  | 0.77442348   | 0          | 0         |
| Zeatin_biosynthesis_ko00908             | Prevotella_dentalis        | 2.314246958  | 0.739447979  | 1.70E-010  | 1.10E-009 |
| Zeatin_biosynthesis_ko00908             | Fermentimonas_caenicola    | 0.744041474  | 0.559966686  | 1.07E-005  | 3.15E-005 |
| Zeatin_biosynthesis_ko00908             | Parabacteroides_sp_HGS0025 | -3.340567    | -0.519453814 | 5.70E-005  | 0.0001367 |
| Zeatin_biosynthesis_ko00908             | Bacteroides_sp_HPS0048     | -0.033429809 | -0.452029731 | 0.00068152 | 0.0011853 |
| Zeatin_biosynthesis_ko00908             | Megasphaera_elsdenii       | -0.036514968 | 0.347131694  | 0.01046170 | 0.0139489 |
| Zeatin_biosynthesis_ko00908             | Acidaminococcus_sp_D21     | 0.013281067  | 0.325404993  | 0.01673093 | 0.0215643 |
| Zeatin_biosynthesis_ko00908             | Coprobacillus_sp_8_1_38FAA | -0.174983397 | -0.32215149  | 0.01751841 | 0.0224959 |
| Toluene_degradation_ko00623             | Prevotella_copri           | 0.001917409  | 0.745683248  | 0          | 0         |
| Toluene_degradation_ko00623             | Prevotella_dentalis        | 0.820839323  | 0.752437507  | 5.37E-011  | 3.53E-010 |
| Toluene_degradation_ko00623             | Prevotella_salivae         | 0.195595019  | 0.695826186  | 1.94E-008  | 1.01E-007 |
| Toluene_degradation_ko00623             | Bacteroides_fluxus         | 0.000418738  | 0.644215742  | 3.34E-007  | 1.31E-006 |
| Toluene_degradation_ko00623             | Bacteroides_sp_4_1_36      | -0.001583292 | -0.537869259 | 0.00003652 | 9.14E-005 |
| Toluene_degradation_ko00623             | Bacteroides_eggerthii      | 0.009439637  | -0.308862207 | 0.02345195 | 0.0296773 |
| Toluene_degradation_ko00623             | Ruminococcus_bicirculans   | -0.014396793 | -0.272576579 | 0.04614249 | 0.0551807 |
| Toluene_degradation_ko00623             | Blautia_obeum              | -0.010927638 | -0.227215552 | 0.09847345 | 0.1109021 |

1  
2  
3

1Supplementary Table 4. Biomarker species gene mapping.

2

| Species <sup>a</sup>      | ko <sup>b</sup> | KO in ko <sup>c</sup> | KO <sup>d</sup> | Percentage % | KO list <sup>e</sup>                                                                                                                                          |
|---------------------------|-----------------|-----------------------|-----------------|--------------|---------------------------------------------------------------------------------------------------------------------------------------------------------------|
| Acidaminococcus_intestini | ko00020         | 56                    | 11              | 19.64        | K00030 K00031 K00174<br>K00175 K00176 K00177<br>K01610 K01679 K01681<br>K01958 K01960                                                                         |
| Prevotella_salivae        | ko00020         | 56                    | 8               | 14.29        | K00024 K00174 K00175<br>K00176 K00177 K01610<br>K01676 K01960                                                                                                 |
| Prevotella_copri          | ko00051         | 81                    | 19              | 23.46        | K00011 K00100 K00754<br>K00847 K00848 K00850<br>K00895 K00966 K00971<br>K01624 K01629 K01711<br>K01803 K01805 K01808<br>K01813 K01840 K02377<br>K04041        |
| Prevotella_dentalis       | ko00051         | 81                    | 20              | 24.69        | K00100 K00754 K00847<br>K00848 K00850 K00895<br>K00966 K00971 K01624<br>K01629 K01711 K01803<br>K01805 K01808 K01809<br>K01813 K01840 K02377<br>K04041 K05305 |
| Prevotella_denticola      | ko00051         | 81                    | 16              | 19.75        | K00100 K00754 K00847<br>K00850 K00895 K00966<br>K00971 K01218 K01624<br>K01711 K01803 K01808<br>K01809 K01840 K02377<br>K04041                                |
| Bacteroides_fluxus        | ko00190         | 212                   | 26              | 12.26        | K00330 K00331 K00335                                                                                                                                          |

1

|                     |         |     |    |       |  |                      |
|---------------------|---------|-----|----|-------|--|----------------------|
|                     |         |     |    |       |  | K00337 K00338 K00339 |
|                     |         |     |    |       |  | K00340 K00341 K00342 |
|                     |         |     |    |       |  | K00343 K02108 K02109 |
|                     |         |     |    |       |  | K02111 K02112 K02113 |
|                     |         |     |    |       |  | K02114 K02115 K02117 |
|                     |         |     |    |       |  | K02118 K02120 K02121 |
|                     |         |     |    |       |  | K02123 K02124 K03885 |
|                     |         |     |    |       |  | K13378 K15987        |
| Prevotella_copri    | ko00190 | 212 | 20 | 9.43  |  | K00330 K00331 K00337 |
|                     |         |     |    |       |  | K00338 K00339 K00340 |
|                     |         |     |    |       |  | K00341 K00342 K00343 |
|                     |         |     |    |       |  | K02108 K02109 K02110 |
|                     |         |     |    |       |  | K02111 K02112 K02113 |
|                     |         |     |    |       |  | K02114 K02115 K02120 |
|                     |         |     |    |       |  | K03885 K13378        |
| Prevotella_dentalis | ko00190 | 212 | 21 | 9.91  |  | K00330 K00331 K00337 |
|                     |         |     |    |       |  | K00338 K00339 K00340 |
|                     |         |     |    |       |  | K00341 K00342 K00343 |
|                     |         |     |    |       |  | K02108 K02109 K02110 |
|                     |         |     |    |       |  | K02111 K02112 K02113 |
|                     |         |     |    |       |  | K02114 K02115 K02120 |
|                     |         |     |    |       |  | K03885 K13378 K15987 |
| Prevotella_copri    | ko00250 | 60  | 21 | 35    |  | K00259 K00262 K00264 |
|                     |         |     |    |       |  | K00265 K00266 K00278 |
|                     |         |     |    |       |  | K00609 K00610 K00764 |
|                     |         |     |    |       |  | K00820 K01424 K01755 |
|                     |         |     |    |       |  | K01756 K01914 K01939 |
|                     |         |     |    |       |  | K01940 K01953 K01955 |
|                     |         |     |    |       |  | K01956 K11540 K11541 |
| Prevotella_fusca    | ko00250 | 60  | 16 | 26.67 |  | K00262 K00266 K00278 |
|                     |         |     |    |       |  | K00609 K00610 K00764 |
|                     |         |     |    |       |  | K00820 K01424 K01744 |
|                     |         |     |    |       |  | K01755 K01756 K01914 |



|                              |         |    |    |       |                                                                                                                                                                      |
|------------------------------|---------|----|----|-------|----------------------------------------------------------------------------------------------------------------------------------------------------------------------|
| Prevotella_intermedia        | ko00250 | 60 | 16 | 26.67 | K01939 K01955 K01956<br>K11541<br>K00262 K00266 K00278<br>K00609 K00610 K00764<br>K00820 K01424 K01744<br>K01755 K01756 K01939<br>K01953 K01955 K01956<br>K11541     |
| Prevotella_salivae           | ko00250 | 60 | 16 | 26.67 | K00259 K00262 K00266<br>K00609 K00610 K00764<br>K00820 K01424 K01744<br>K01755 K01756 K01914<br>K01939 K01955 K01956<br>K11541                                       |
| Prevotella_sp_oral_taxon_299 | ko00250 | 60 | 14 | 23.33 | K00262 K00609 K00610<br>K00764 K00820 K01424<br>K01744 K01755 K01756<br>K01914 K01939 K01955<br>K01956<br>K11541                                                     |
| Dialister_succinatiphilus    | ko00400 | 70 | 21 | 30    | K00014 K00766 K00800<br>K00812 K00817 K00832<br>K00891 K01609 K01626<br>K01657 K01658 K01695<br>K01696 K01713 K01735<br>K01736 K03856 K04517<br>K06001 K13497 K14170 |
| Prevotella_copri             | ko00400 | 70 | 19 | 27.14 | K00014 K00210 K00766<br>K00800 K00812 K00817<br>K00891 K01609 K01657<br>K01658 K01695 K01696<br>K01735 K01736 K01817<br>K03786 K04516 K04518                         |

|                       |         |    |    |       |                                                                                                                                                                  |
|-----------------------|---------|----|----|-------|------------------------------------------------------------------------------------------------------------------------------------------------------------------|
| Prevotella_dentalis   | ko00400 | 70 | 20 | 28.57 | K06001<br>K00014 K00210 K00766<br>K00800 K00812 K00817<br>K00891 K01609 K01626<br>K01657 K01658 K01695<br>K01696 K01735 K01736<br>K01817 K03786 K04516<br>K04518 |
| Prevotella_fusca      | ko00400 | 70 | 16 | 22.86 | K06001<br>K00014 K00210 K00766<br>K00800 K00812 K00817<br>K00891 K01657 K01658<br>K01735 K01736 K01817<br>K03786 K04516 K04518                                   |
| Prevotella_intermedia | ko00400 | 70 | 12 | 17.14 | K06001<br>K00014 K00210 K00800<br>K00812 K00891 K01609<br>K01657 K01658 K01735<br>K01736 K03786<br>K04516                                                        |
| Prevotella_ruminicola | ko00400 | 70 | 19 | 27.14 | K00014 K00210 K00766<br>K00800 K00812 K00817<br>K00891 K01609 K01657<br>K01658 K01695 K01696<br>K01735 K01736 K01817<br>K03786 K04516 K04518                     |
| Prevotella_salivae    | ko00400 | 70 | 14 | 20    | K06001<br>K00014 K00210 K00766<br>K00800 K00812 K00891<br>K01609 K01626 K01735<br>K01736 K03786 K04516<br>K04518 K06001                                          |
| Bacteroides_fluxus    | ko00473 | 5  | 1  | 20    | K01775                                                                                                                                                           |

|                           |         |    |    |       |                                                                                                                      |
|---------------------------|---------|----|----|-------|----------------------------------------------------------------------------------------------------------------------|
| Prevotella_copri          | ko00473 | 5  | 1  | 20    | K01775                                                                                                               |
| Prevotella_dentalis       | ko00473 | 5  | 1  | 20    | K01775                                                                                                               |
| Prevotella_salivae        | ko00473 | 5  | 1  | 20    | K01775                                                                                                               |
| Fermentimonas_caenicola   | ko00510 | 44 | 1  | 2.27  | K00721                                                                                                               |
| Prevotella_copri          | ko00510 | 44 | 1  | 2.27  | K00721                                                                                                               |
| Prevotella_dentalis       | ko00510 | 44 | 1  | 2.27  | K00721                                                                                                               |
| Acidaminococcus_intestini | ko00540 | 34 | 15 | 44.12 | K00677 K00748 K00979<br>K01627 K02517 K02527<br>K02535 K02536 K02843<br>K03270 K03271 K03272<br>K03273 K03274 K16363 |
| Bacteroides_fluxus        | ko00540 | 34 | 11 | 32.35 | K00677 K00748 K00912<br>K00979 K01627 K02517<br>K02527 K02536 K03269<br>K03270 K16363                                |
| Bacteroides_sp__3_2_5     | ko00540 | 34 | 13 | 38.24 | K00677 K00748 K00912<br>K00979 K01627 K02517<br>K02527 K02536 K03269<br>K03270 K03271 K03273<br>K16363               |
| Bibersteinia_trehalosi    | ko00540 | 34 | 15 | 44.12 | K00677 K00748 K00912<br>K00979 K01627 K02527<br>K02535 K02536 K02560<br>K02843 K03270 K03271<br>K03272 K03273 K03274 |
| Dialister_succinatiphilus | ko00540 | 34 | 12 | 35.29 | K00677 K00748 K00912<br>K00979 K01627 K02527<br>K02535 K02536 K03271<br>K03272 K07031<br>K16363                      |
| Fermentimonas_caenicola   | ko00540 | 34 | 10 | 29.41 | K00677 K00748 K00912<br>K00979 K01627 K02527<br>K02536 K03269 K03270                                                 |

|                           |         |    |    |       |                                                                                                                         |
|---------------------------|---------|----|----|-------|-------------------------------------------------------------------------------------------------------------------------|
| Prevotella_copri          | ko00540 | 34 | 14 | 41.18 | K16363<br>K00677 K00748 K00912<br>K00979 K01627 K02517<br>K02527 K02536 K03269<br>K03270 K03271 K03273<br>K07031 K16363 |
| Prevotella_fusca          | ko00540 | 34 | 11 | 32.35 | K00677 K00748 K00912<br>K00979 K01627 K02517<br>K02527 K02536 K03269<br>K03270 K16363                                   |
| Prevotella_melaninogenica | ko00540 | 34 | 11 | 32.35 | K00677 K00748 K00912<br>K00979 K01627 K02517<br>K02527 K02536 K03269<br>K03270 K16363                                   |
| Prevotella_oralis         | ko00540 | 34 | 13 | 38.24 | K00677 K00748 K00912<br>K00979 K01627 K02517<br>K02527 K02536 K03269<br>K03270 K03271 K03273<br>K16363                  |
| Prevotella_ruminicola     | ko00540 | 34 | 11 | 32.35 | K00677 K00748 K00912<br>K00979 K01627 K02517<br>K02527 K02536 K03269<br>K03270 K16363                                   |
| Prevotella_salivae        | ko00540 | 34 | 11 | 32.35 | K00677 K00748 K00912<br>K00979 K01627 K02517<br>K02527 K02536 K03269<br>K03270 K16363                                   |
| Riemerella_anatipestifer  | ko00540 | 34 | 6  | 17.65 | K00677 K00748 K01627<br>K02517 K02536                                                                                   |
| Prevotella_copri          | ko00550 | 38 | 15 | 39.47 | K16363<br>K00075 K00790 K01000<br>K01921 K01924 K01925<br>K01928 K01929 K02563                                          |

|                                  |         |    |    |       |                                                                                                                                                                      |
|----------------------------------|---------|----|----|-------|----------------------------------------------------------------------------------------------------------------------------------------------------------------------|
| Prevotella_dentalis              | ko00550 | 38 | 15 | 39.47 | K03587 K03814 K05366<br>K05515 K06153 K07259<br>K00075 K00790 K01000<br>K01921 K01924 K01925<br>K01928 K01929 K02563<br>K03587 K03814 K05366<br>K05515 K06153 K07259 |
| Prevotella_salivae               | ko00550 | 38 | 15 | 39.47 | K00075 K00790 K01000<br>K01921 K01924 K01925<br>K01928 K01929 K02563<br>K03587 K03814 K05366<br>K05515 K06153 K07259                                                 |
| Prevotella_sp__oral_taxon_299    | ko00550 | 38 | 15 | 39.47 | K00075 K00790 K01000<br>K01921 K01924 K01925<br>K01928 K01929 K02563<br>K03587 K03814 K05366<br>K05515 K06153 K07259                                                 |
| Bacteroides_fluxus               | ko00623 | 51 | 3  | 5.88  | K00239 K00240 K00241                                                                                                                                                 |
| Prevotella_copri                 | ko00623 | 51 | 3  | 5.88  | K00239 K00240 K00241                                                                                                                                                 |
| Prevotella_dentalis              | ko00623 | 51 | 3  | 5.88  | K00239 K00240 K00241                                                                                                                                                 |
| Prevotella_salivae               | ko00623 | 51 | 3  | 5.88  | K00239 K00240 K00241                                                                                                                                                 |
| Prevotella_oralis                | ko00670 | 27 | 11 | 40.74 | K00287 K00297 K00548<br>K00560 K00602 K00604<br>K00605 K01491 K01934<br>K01938 K08289                                                                                |
| Prevotella_salivae               | ko00670 | 27 | 10 | 37.04 | K00287 K00297 K00548<br>K00560 K00602 K00604<br>K01491 K01938 K03465<br>K08289                                                                                       |
| Bibersteinia_trehalosi           | ko00710 | 37 | 7  | 18.92 | K00029 K00134 K00615<br>K00927 K01595 K01783<br>K01807                                                                                                               |
| Clostridiales_bacterium_VE202_14 | ko00710 | 37 | 6  | 16.22 | K00029 K00134 K00615                                                                                                                                                 |

|                               |         |    |    |       |        |               |
|-------------------------------|---------|----|----|-------|--------|---------------|
|                               |         |    |    |       | K00927 | K01006        |
|                               |         |    |    |       | K01783 |               |
| Prevotella_copri              | ko00710 | 37 | 6  | 16.22 | K00029 | K00134 K00615 |
|                               |         |    |    |       | K00927 | K01006        |
|                               |         |    |    |       | K01783 |               |
| Prevotella_melaninogenica     | ko00710 | 37 | 6  | 16.22 | K00029 | K00134 K00615 |
|                               |         |    |    |       | K00927 | K01006        |
|                               |         |    |    |       | K01783 |               |
| Prevotella_salivae            | ko00710 | 37 | 6  | 16.22 | K00029 | K00134 K00615 |
|                               |         |    |    |       | K00927 | K01006        |
|                               |         |    |    |       | K01783 |               |
| Streptococcus_pneumoniae      | ko00710 | 37 | 7  | 18.92 | K00134 | K00150 K00615 |
|                               |         |    |    |       | K00927 | K01595 K01783 |
|                               |         |    |    |       | K01807 |               |
| Prevotella_copri              | ko00760 | 44 | 9  | 20.45 | K00767 | K00858 K00969 |
|                               |         |    |    |       | K01081 | K01950 K03426 |
|                               |         |    |    |       | K03517 | K03783 K03787 |
| Prevotella_denticola          | ko00760 | 44 | 10 | 22.73 | K00763 | K00767 K00858 |
|                               |         |    |    |       | K00969 | K01081 K01950 |
|                               |         |    |    |       | K03426 | K03517 K03783 |
|                               |         |    |    |       | K03787 |               |
| Prevotella_fusca              | ko00760 | 44 | 10 | 22.73 | K00763 | K00767 K00858 |
|                               |         |    |    |       | K00969 | K01081 K01950 |
|                               |         |    |    |       | K03426 | K03517 K03783 |
|                               |         |    |    |       | K03787 |               |
| Prevotella_sp__oral_taxon_299 | ko00760 | 44 | 9  | 20.45 | K00763 | K00767 K00858 |
|                               |         |    |    |       | K00969 | K01081 K01950 |
|                               |         |    |    |       | K03426 | K03783 K03787 |
| Fermentimonas_caenicola       | ko00900 | 50 | 10 | 20    | K00099 | K00806 K00919 |
|                               |         |    |    |       | K00991 | K01662 K01770 |
|                               |         |    |    |       | K02523 | K03526 K03527 |
|                               |         |    |    |       | K13789 |               |
| Prevotella_copri              | ko00900 | 50 | 11 | 22    | K00099 | K00806 K00919 |

|                               |         |    |    |       |                                                                                                 |
|-------------------------------|---------|----|----|-------|-------------------------------------------------------------------------------------------------|
|                               |         |    |    |       | K00991 K01662 K01770<br>K02523 K03526 K03527<br>K12506 K13789                                   |
| Prevotella_dentalis           | ko00900 | 50 | 11 | 22    | K00099 K00806 K00919<br>K00991 K01662 K01770<br>K02523 K03526 K03527<br>K12506 K13789           |
| Prevotella_sp__oral_taxon_299 | ko00900 | 50 | 11 | 22    | K00099 K00806 K00919<br>K00991 K01662 K01770<br>K02523 K03526 K03527<br>K12506 K13789           |
| Acidaminococcus_sp_D21        | ko00908 | 8  | 1  | 12.5  | K00791                                                                                          |
| Fermentimonas_caenicola       | ko00908 | 8  | 1  | 12.5  | K00791                                                                                          |
| Megasphaera_elsdenii          | ko00908 | 8  | 1  | 12.5  | K00791                                                                                          |
| Prevotella_copri              | ko00908 | 8  | 1  | 12.5  | K00791                                                                                          |
| Prevotella_dentalis           | ko00908 | 8  | 1  | 12.5  | K00791                                                                                          |
| Bibersteinia_trehalosi        | ko03018 | 75 | 12 | 16    | K00962 K01689 K03628<br>K03654 K03666 K03732<br>K04043 K04077 K05592<br>K08300 K08311<br>K12573 |
| Prevotella_copri              | ko03018 | 75 | 10 | 13.33 | K00962 K00970 K03628<br>K03654 K04043 K04077<br>K05592 K11927 K12573<br>K12574                  |
| Prevotella_salivae            | ko03018 | 75 | 10 | 13.33 | K00962 K00970 K01689<br>K03628 K03654 K04043<br>K04077 K05592 K11927<br>K12573                  |
| Prevotella_salivae            | ko03060 | 39 | 10 | 25.64 | K03070 K03075 K03076<br>K03100 K03101 K03106<br>K03110 K03210 K03217<br>K12257                  |

|                           |         |    |   |      |        |
|---------------------------|---------|----|---|------|--------|
| Acidaminococcus_intestini | ko05111 | 43 | 1 | 2.33 | K07173 |
| Prevotella_copri          | ko05111 | 43 | 1 | 2.33 | K07173 |
| Prevotella_melaninogenica | ko05111 | 43 | 1 | 2.33 | K07173 |
| Fermentimonas_caenicola   | ko05120 | 90 | 1 | 1.11 | K08303 |

---

1

2a Biomarker specie.

3b Biomarker pathways.

4c Number of genes in pathways.

5d Number of genes in pathways that map in the biomarker specie.

6e List of genes in pathways that map in the biomarker specie.

7

8

9

10

11

12

13

14

15

16

17

18

19

1



**1Supplementary Table 5.** Network statistics.

2

|                     | Mean Degree | Mean betweenness centrality | Mean closeness centrality | Mean Eigenvector centrality | %Pos  | %Neg  | Ratio | Fragmentation | Modularity | Transitivity | Diameter | Mean short-pathways | K-Smirnov p-value | Node |
|---------------------|-------------|-----------------------------|---------------------------|-----------------------------|-------|-------|-------|---------------|------------|--------------|----------|---------------------|-------------------|------|
| Co-corrence network | 3.88        | 262.38                      | 0.001                     | 0.106                       | 0.431 | 0.569 | 0.758 | 0.134         | 0.428      | 0.155        | 10       | 4.079               | 0.603             | 176  |
| Enzimatic network   | 17.15       | 10364.49                    | 1.97e-07                  | 0.018                       |       |       |       | 0.433         | 0.780      | 0.369        | 26       | 6.600               | 0.702             | 3700 |

3

4(a) Percentage of edges with a statistically significant positive correlation

5(b) Percentage of edges with a statistically significant negative correlation

6(c) Ratio between the positive and negative correlations.

7(d) Modularity index retrieved from the modules estimate by the Walktrap community finding algorithm

8(e) Clustering coefficient of the network. measure of the degree to which nodes in a graph tend to cluster together.

9(f) Longest path between two vertices within the network

10(g) Average path length between any two nodes

11

**1Supplementary Table 6.** Bayesian network quantile 95 nodes. The quantile 95 based on the three different statistics: the degree centrality, the number of direct connections with a clinical variable and the MB size. DNAseq referred to metagenomics and RNAseq to metatranscriptomics.

3

| Node name                                                  | Number of direct connections<br>(degree centrality) |
|------------------------------------------------------------|-----------------------------------------------------|
| DNA seq Terpenoid backbone biosynthesis ko00900            | 17                                                  |
| BPI (ng/mL)                                                | 17                                                  |
| DNA seq Valine leucine and isoleucine degradation ko00280  | 18                                                  |
| RNA seq Butanoate metabolism ko00650                       | 18                                                  |
| %CD4+HLA-DR+CD38+ T-cells                                  | 18                                                  |
| DNA seq Alanine aspartate and glutamate metabolism ko00250 | 19                                                  |
| DNA seq Aminobenzoate degradation ko00627                  | 19                                                  |
| sj/ $\beta$ -TREC ratio                                    | 22                                                  |
| CD4+ T-cell counts (cells/uL)                              | 24                                                  |
| DNA seq Nicotinate and nicotinamide metabolism ko00760     | 25                                                  |

4

5

6

| Node name                                                                | Number of direct connections<br>with a clinical variable |
|--------------------------------------------------------------------------|----------------------------------------------------------|
| DNA seq Limonene and pinene degradation ko00903                          | 7                                                        |
| Metabolite Diradylglycerols [GL02] Glycerolipids [GL] LMGL02010346       | 7                                                        |
| Metabolite Diradylglycerols [GL02] Glycerolipids [GL] 582.5218@10.206741 | 7                                                        |
| DNA seq Glyoxylate and dicarboxylate metabolism ko00630                  | 9                                                        |
| Metabolite Steroid conjugates [ST05] Sterol Lipids [ST] LMST05010043     | 9                                                        |
| DNA seq Valine leucine and isoleucine degradation ko00280                | 10                                                       |
| RNA seq ABC transporters ko02010                                         | 11                                                       |
| DNA seq Nicotinate and nicotinamide metabolism ko00760                   | 12                                                       |
| RNA seq Butanoate metabolism ko00650                                     | 16                                                       |

7

8

1

1

| Node name                                                                | Markov blanket size in nodes |
|--------------------------------------------------------------------------|------------------------------|
| DNA seq Aminobenzoate degradation ko00627                                | 67                           |
| Metabolite Diradylglycerols [GL02] Glycerolipids [GL] 582.5218@10.206741 | 67                           |
| Metabolite Steroid conjugates [ST05] Sterol Lipids [ST] LMST05010043     | 68                           |
| RNA seq ABC transporters ko02010                                         | 69                           |
| DNA seq Glyoxylate and dicarboxylate metabolism ko00630                  | 74                           |
| DNA seq D Alanine metabolism ko00473                                     | 75                           |

2
