# Supplementary material
Source: PubMed Central journal article supplement (PMC6052150)

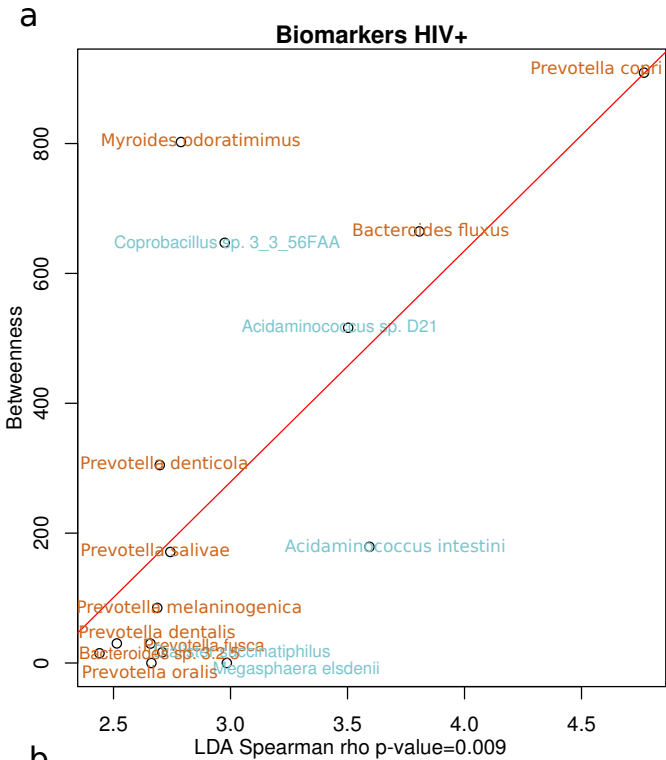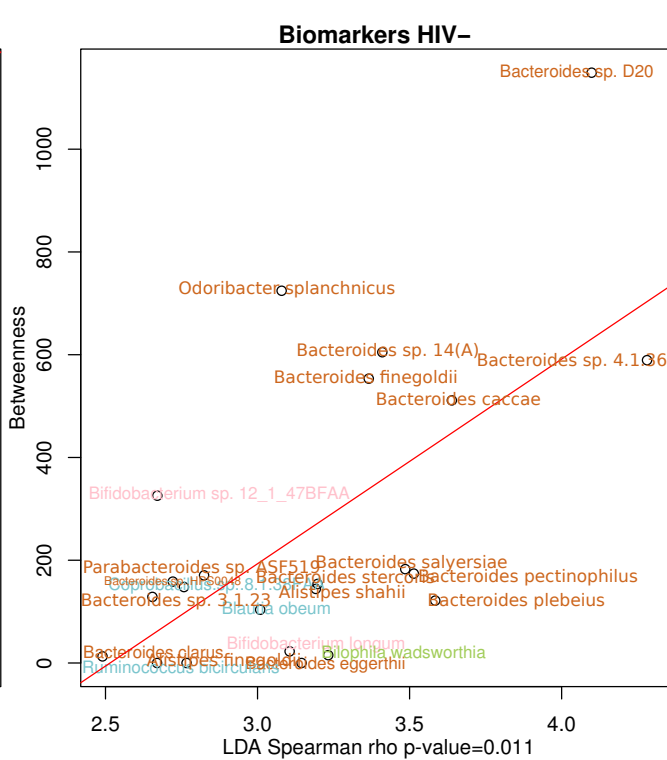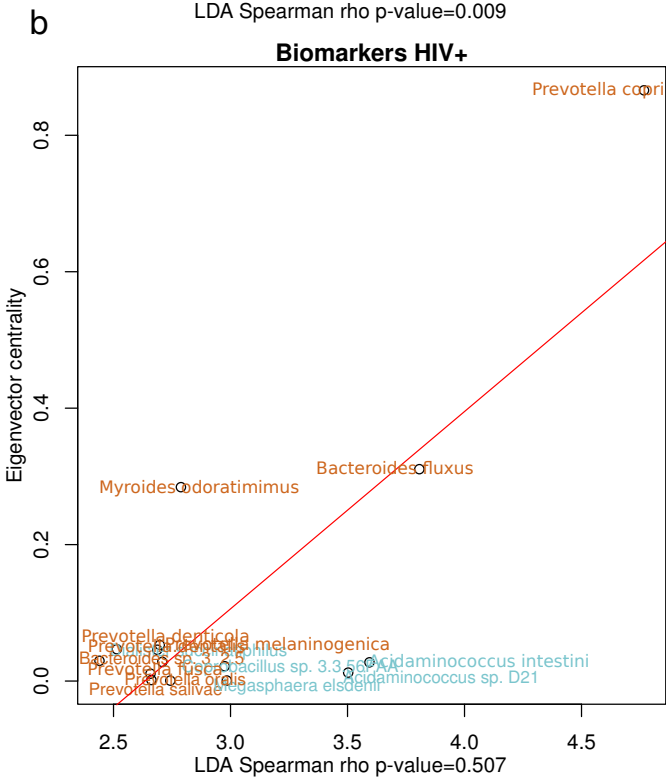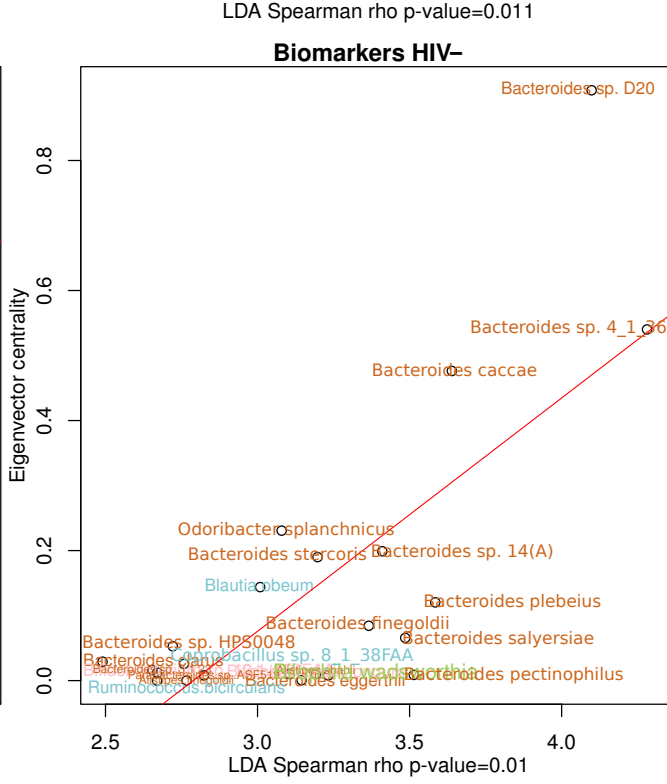

Supplement: 41396_2018_151_MOESM10_ESM.pdf [file 41396_2018_151_MOESM10_ESM.pdf]

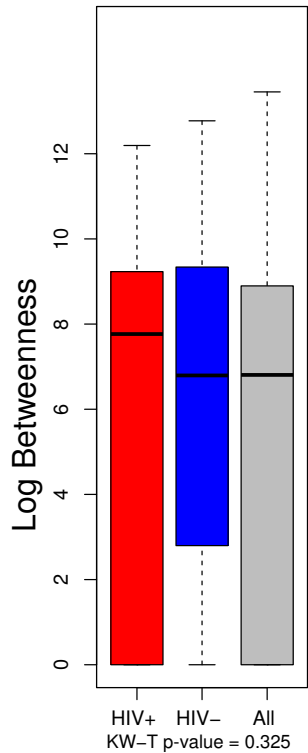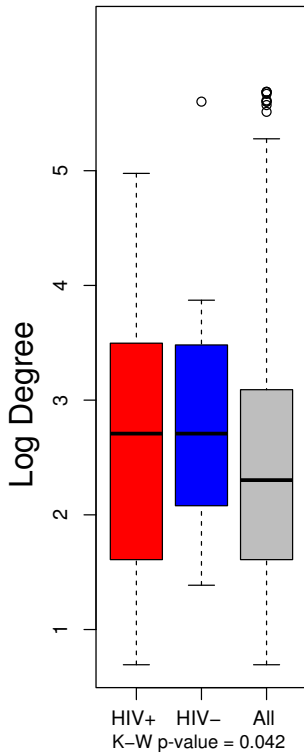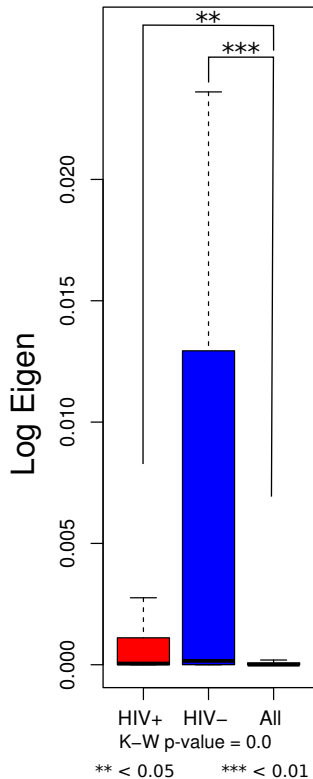

Supplement: 41396_2018_151_MOESM11_ESM.pdf [file 41396_2018_151_MOESM11_ESM.pdf]

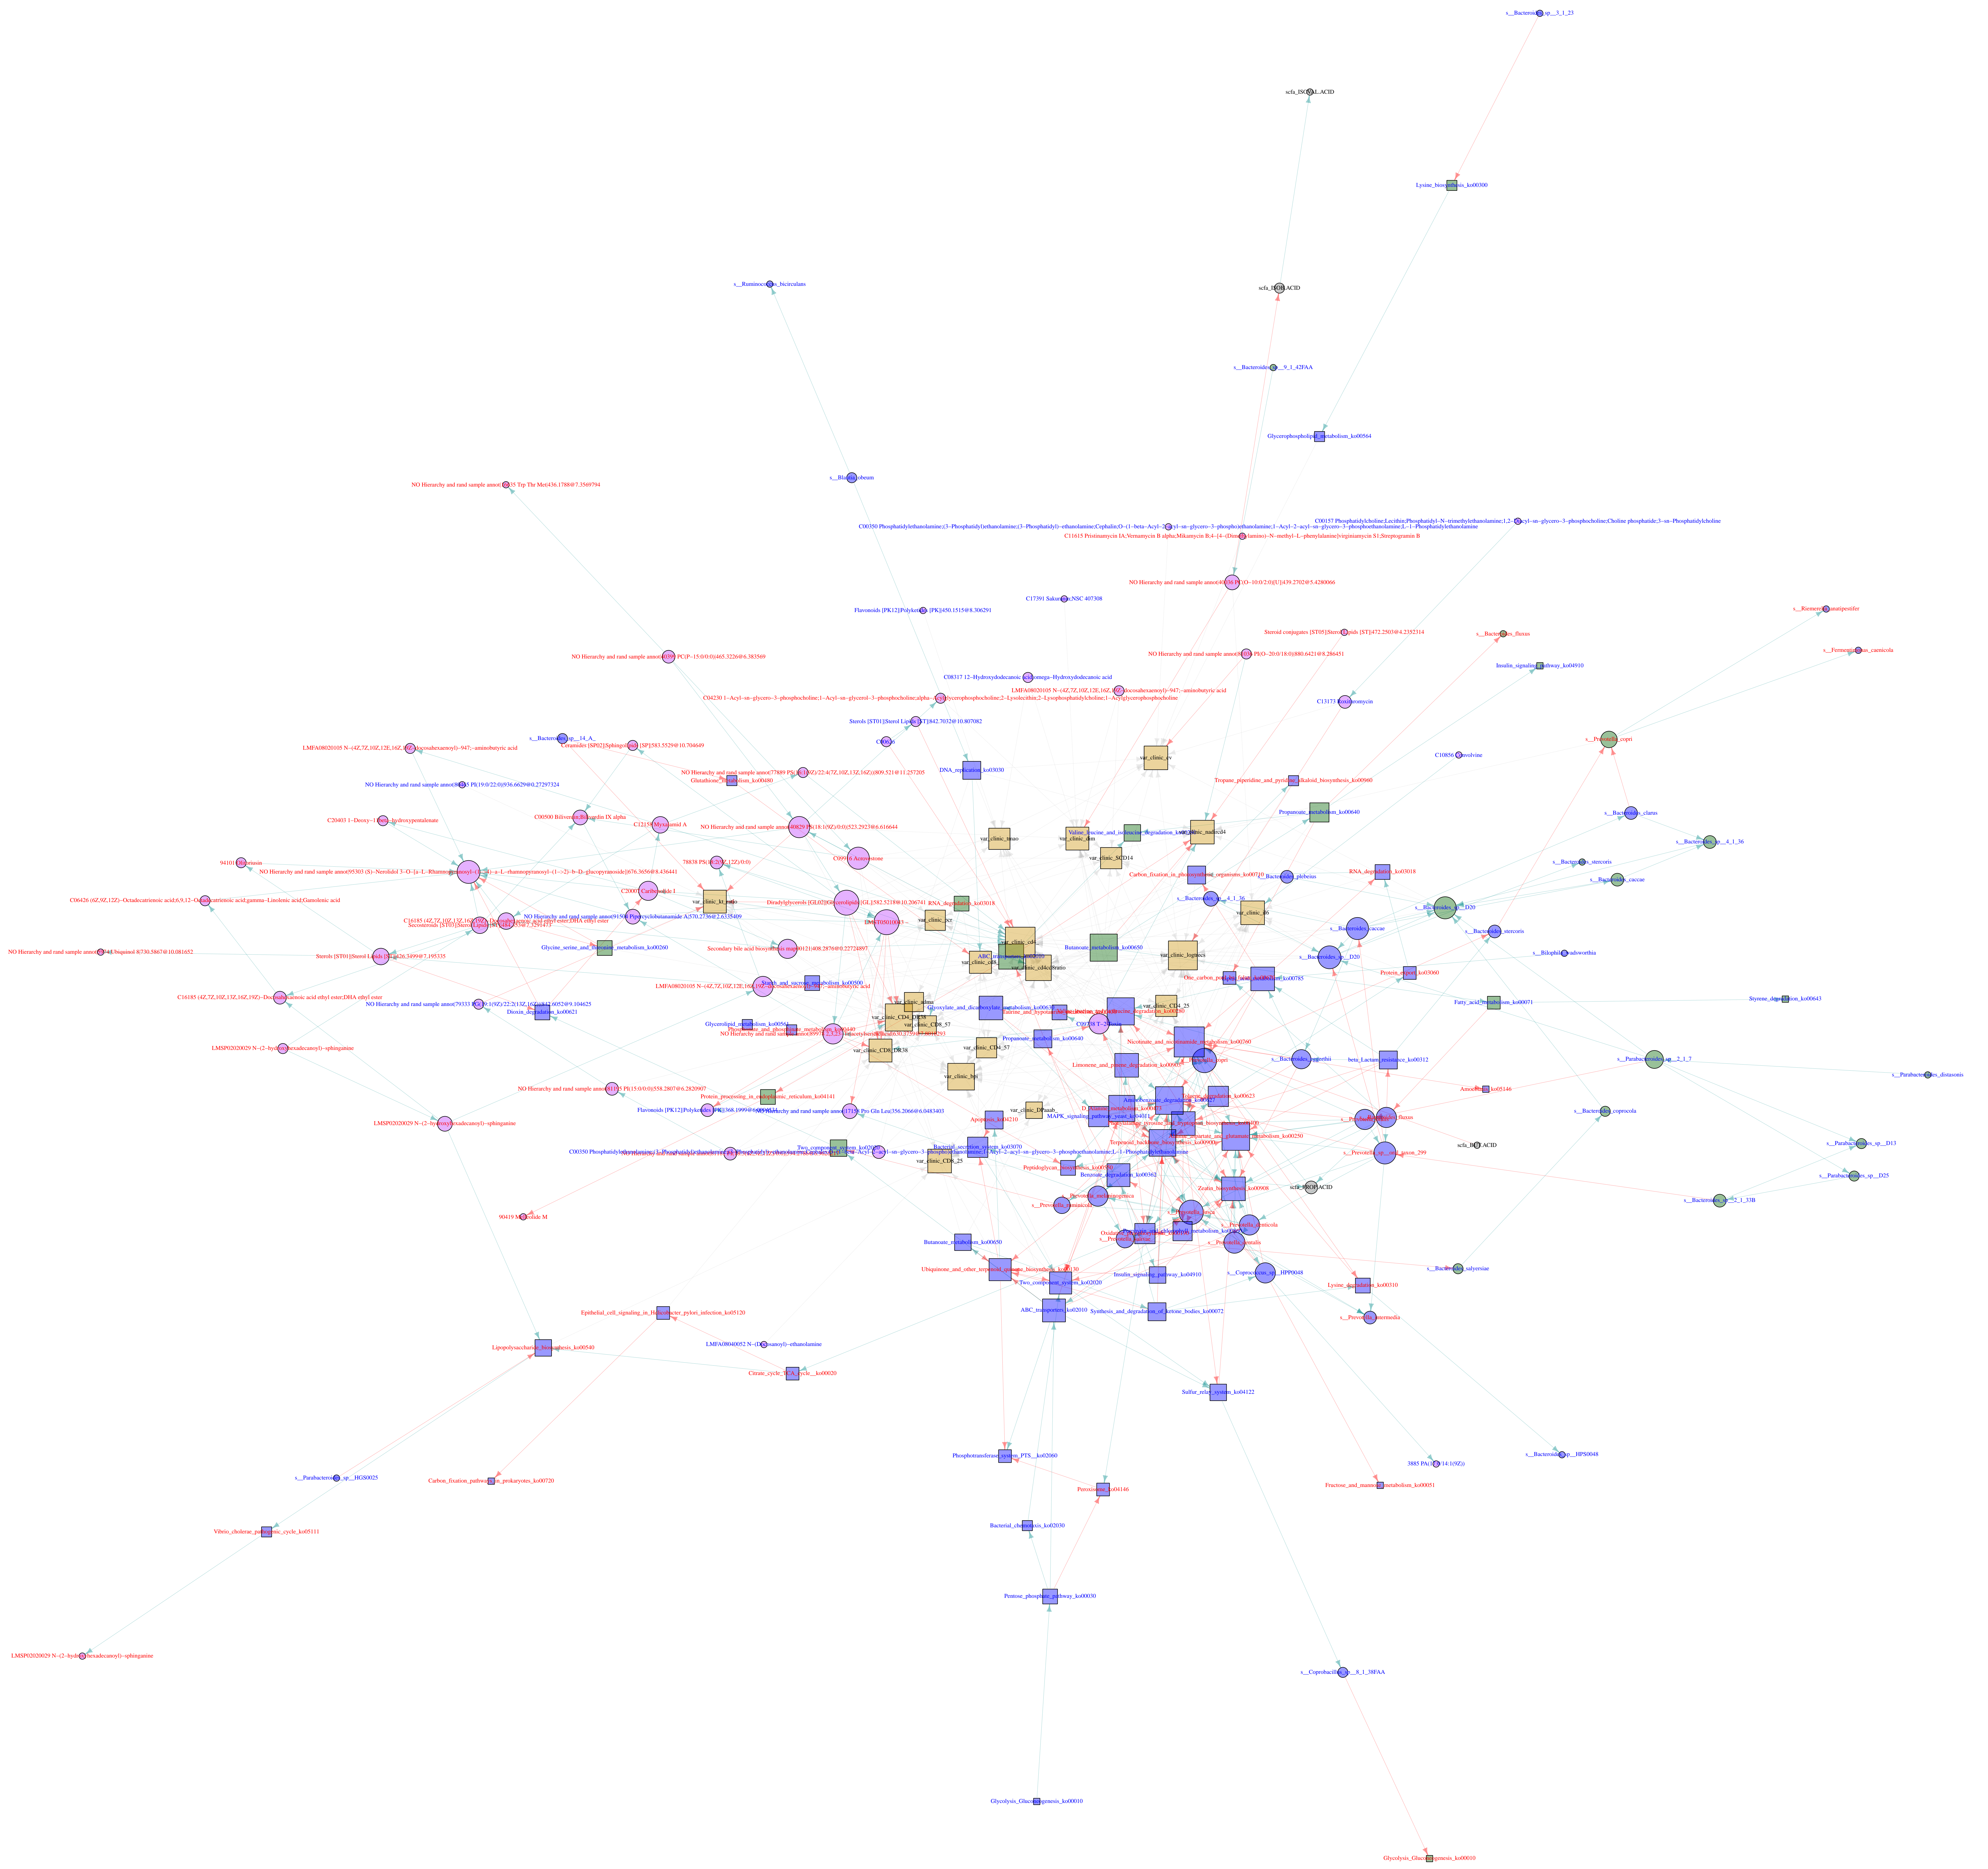

Supplement: 41396_2018_151_MOESM12_ESM.pdf [file 41396_2018_151_MOESM12_ESM.pdf]

**a**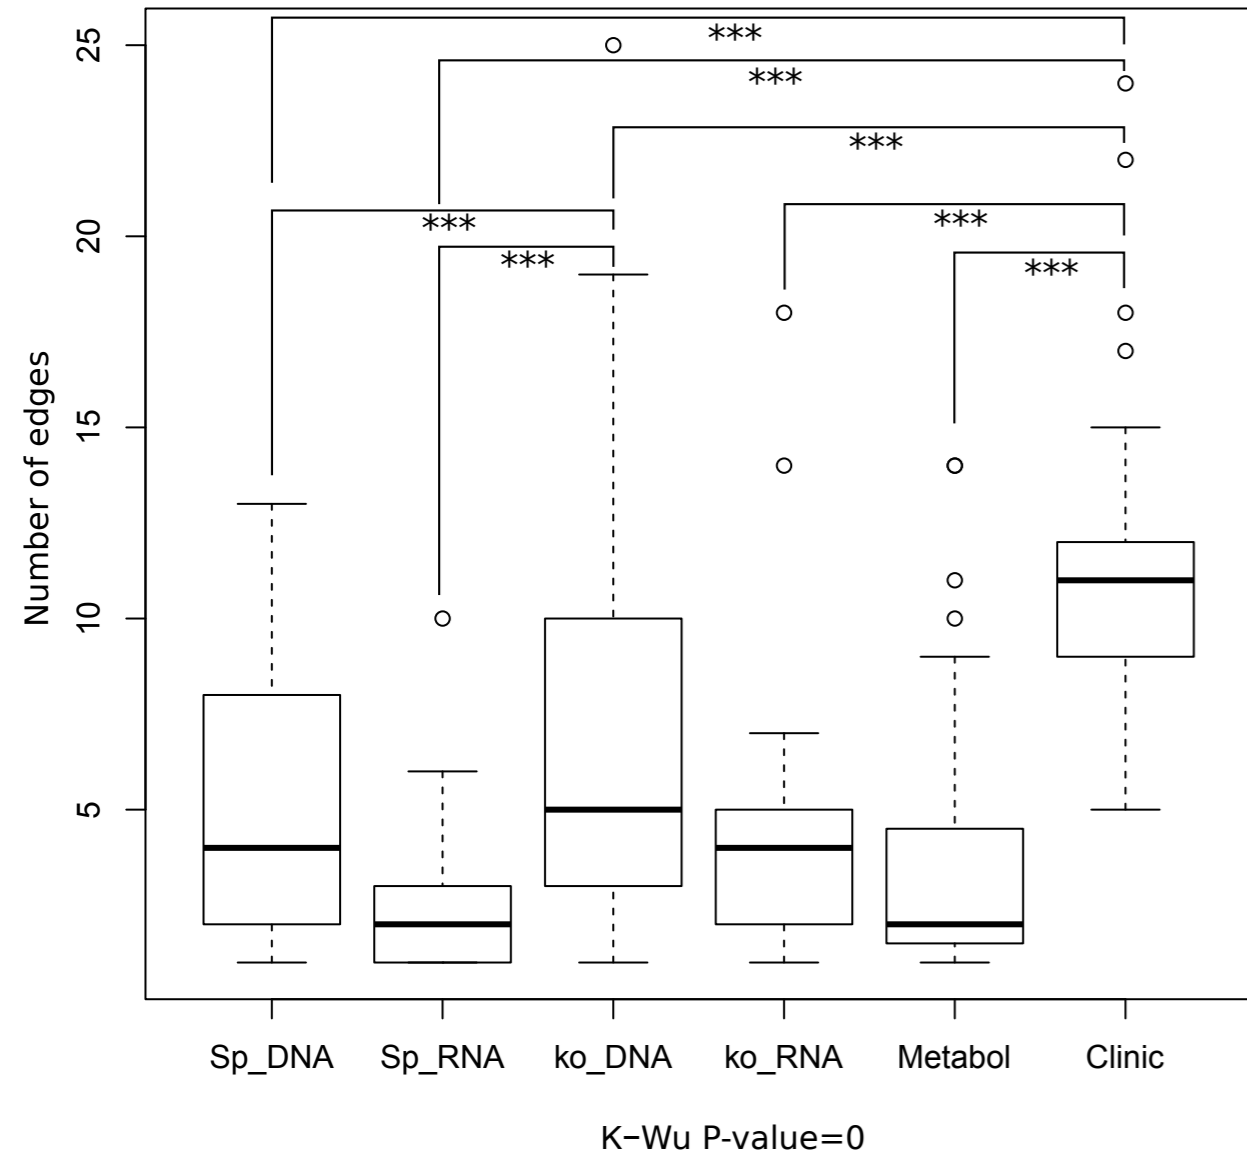**b**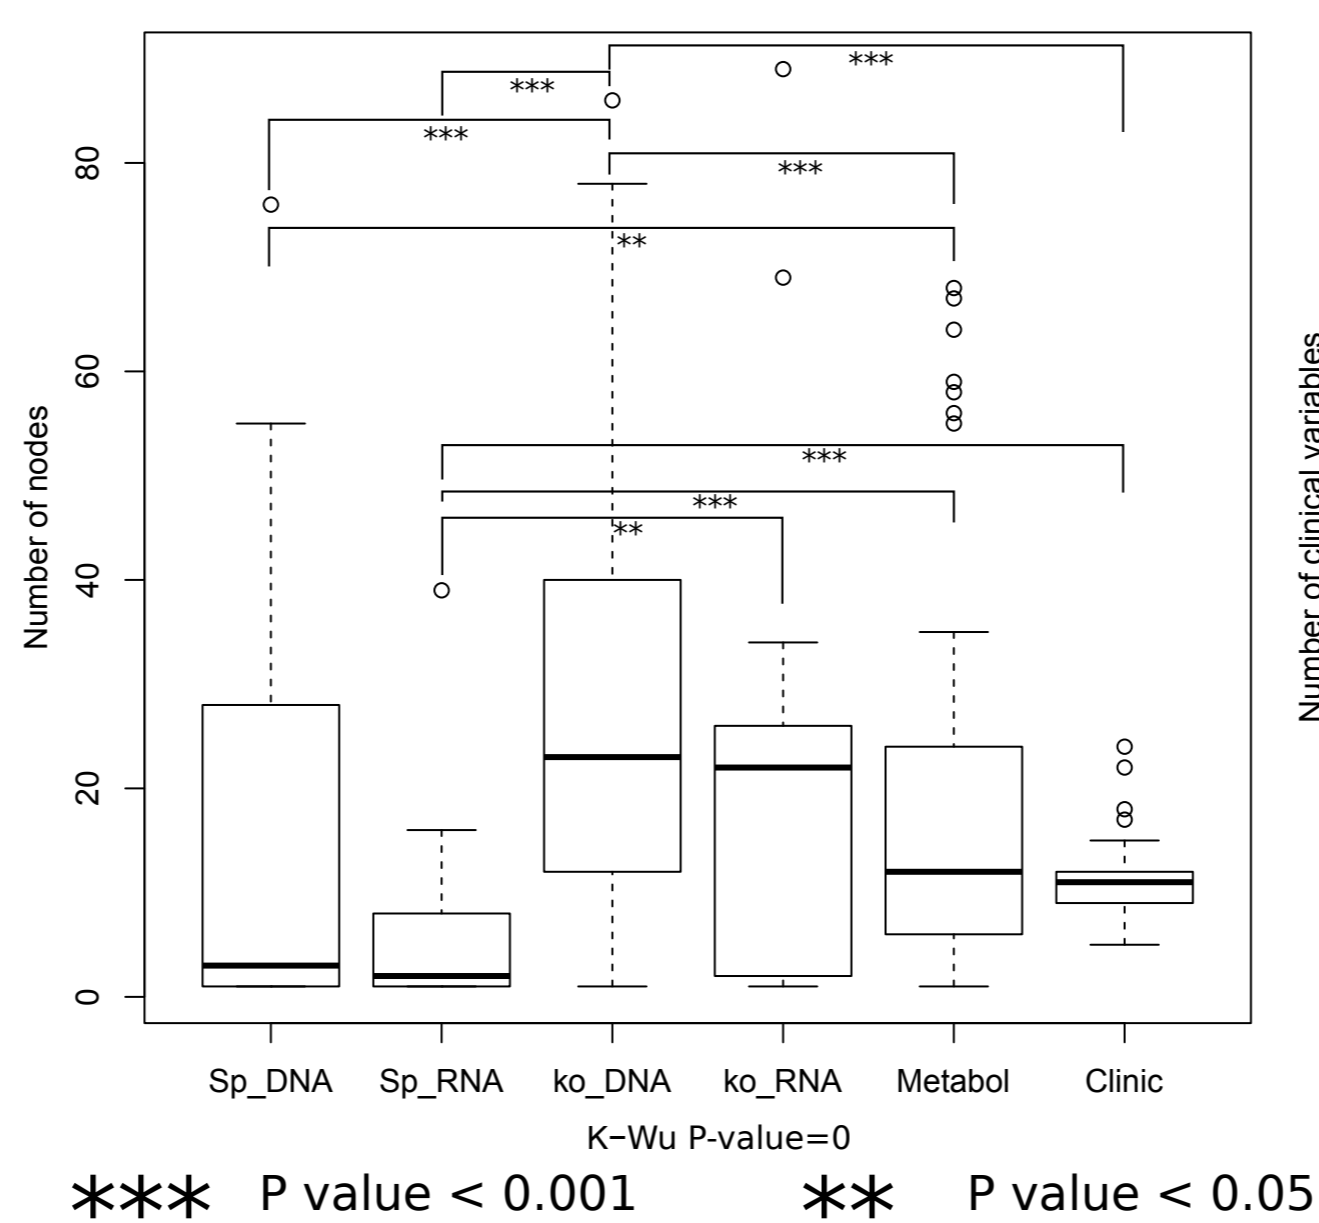**c**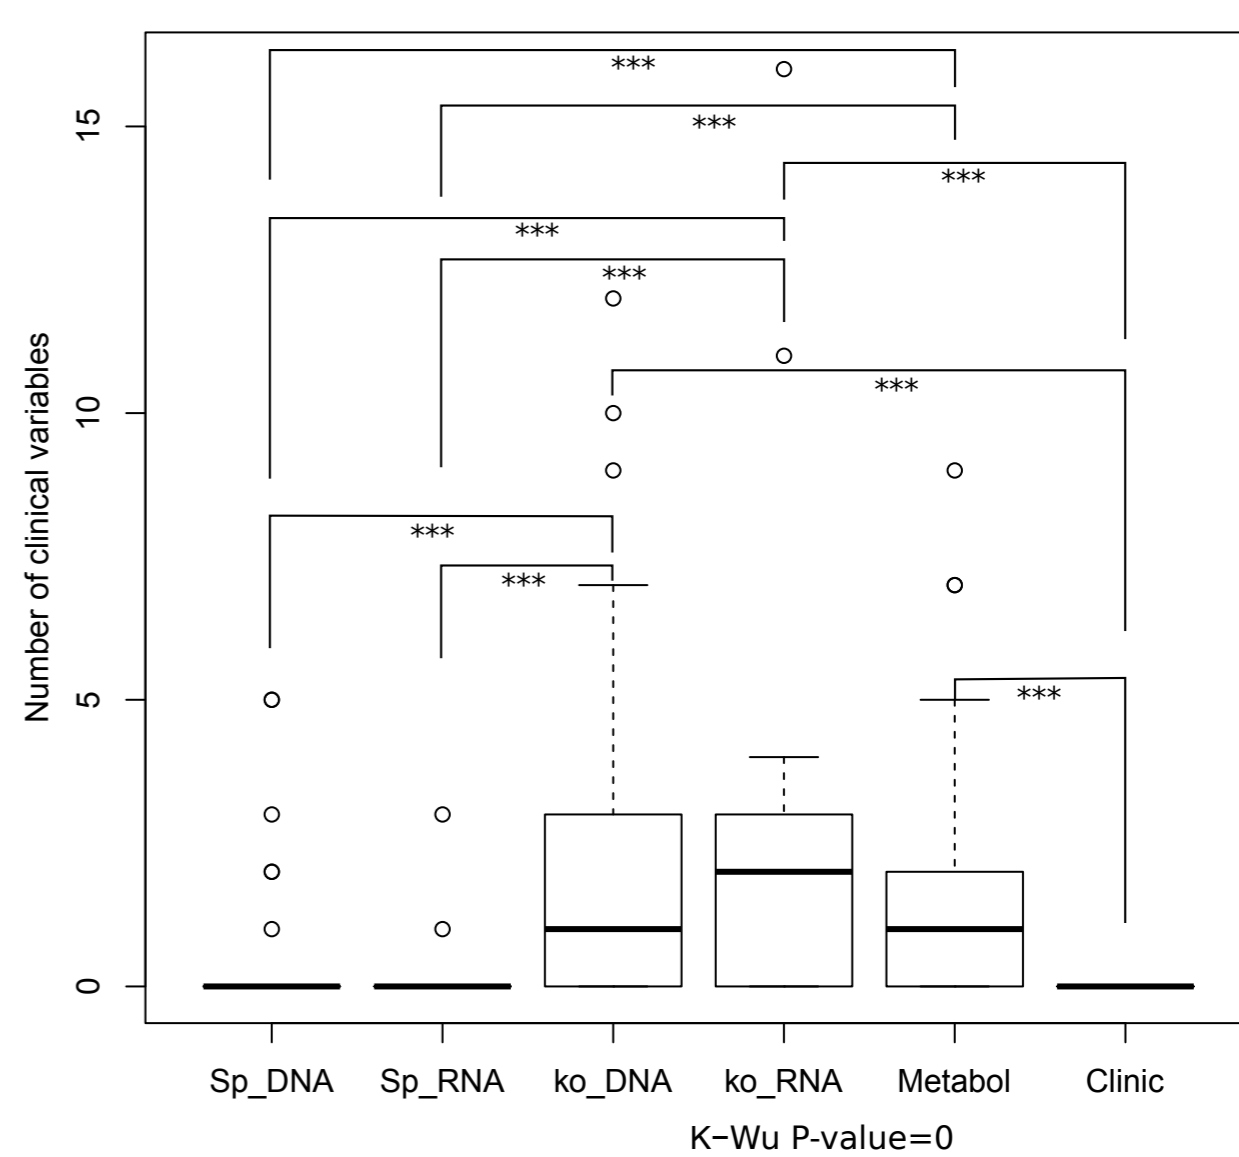

Supplement: 41396_2018_151_MOESM13_ESM.pdf [file 41396_2018_151_MOESM13_ESM.pdf]

# Metagenomic KO NMDS

a

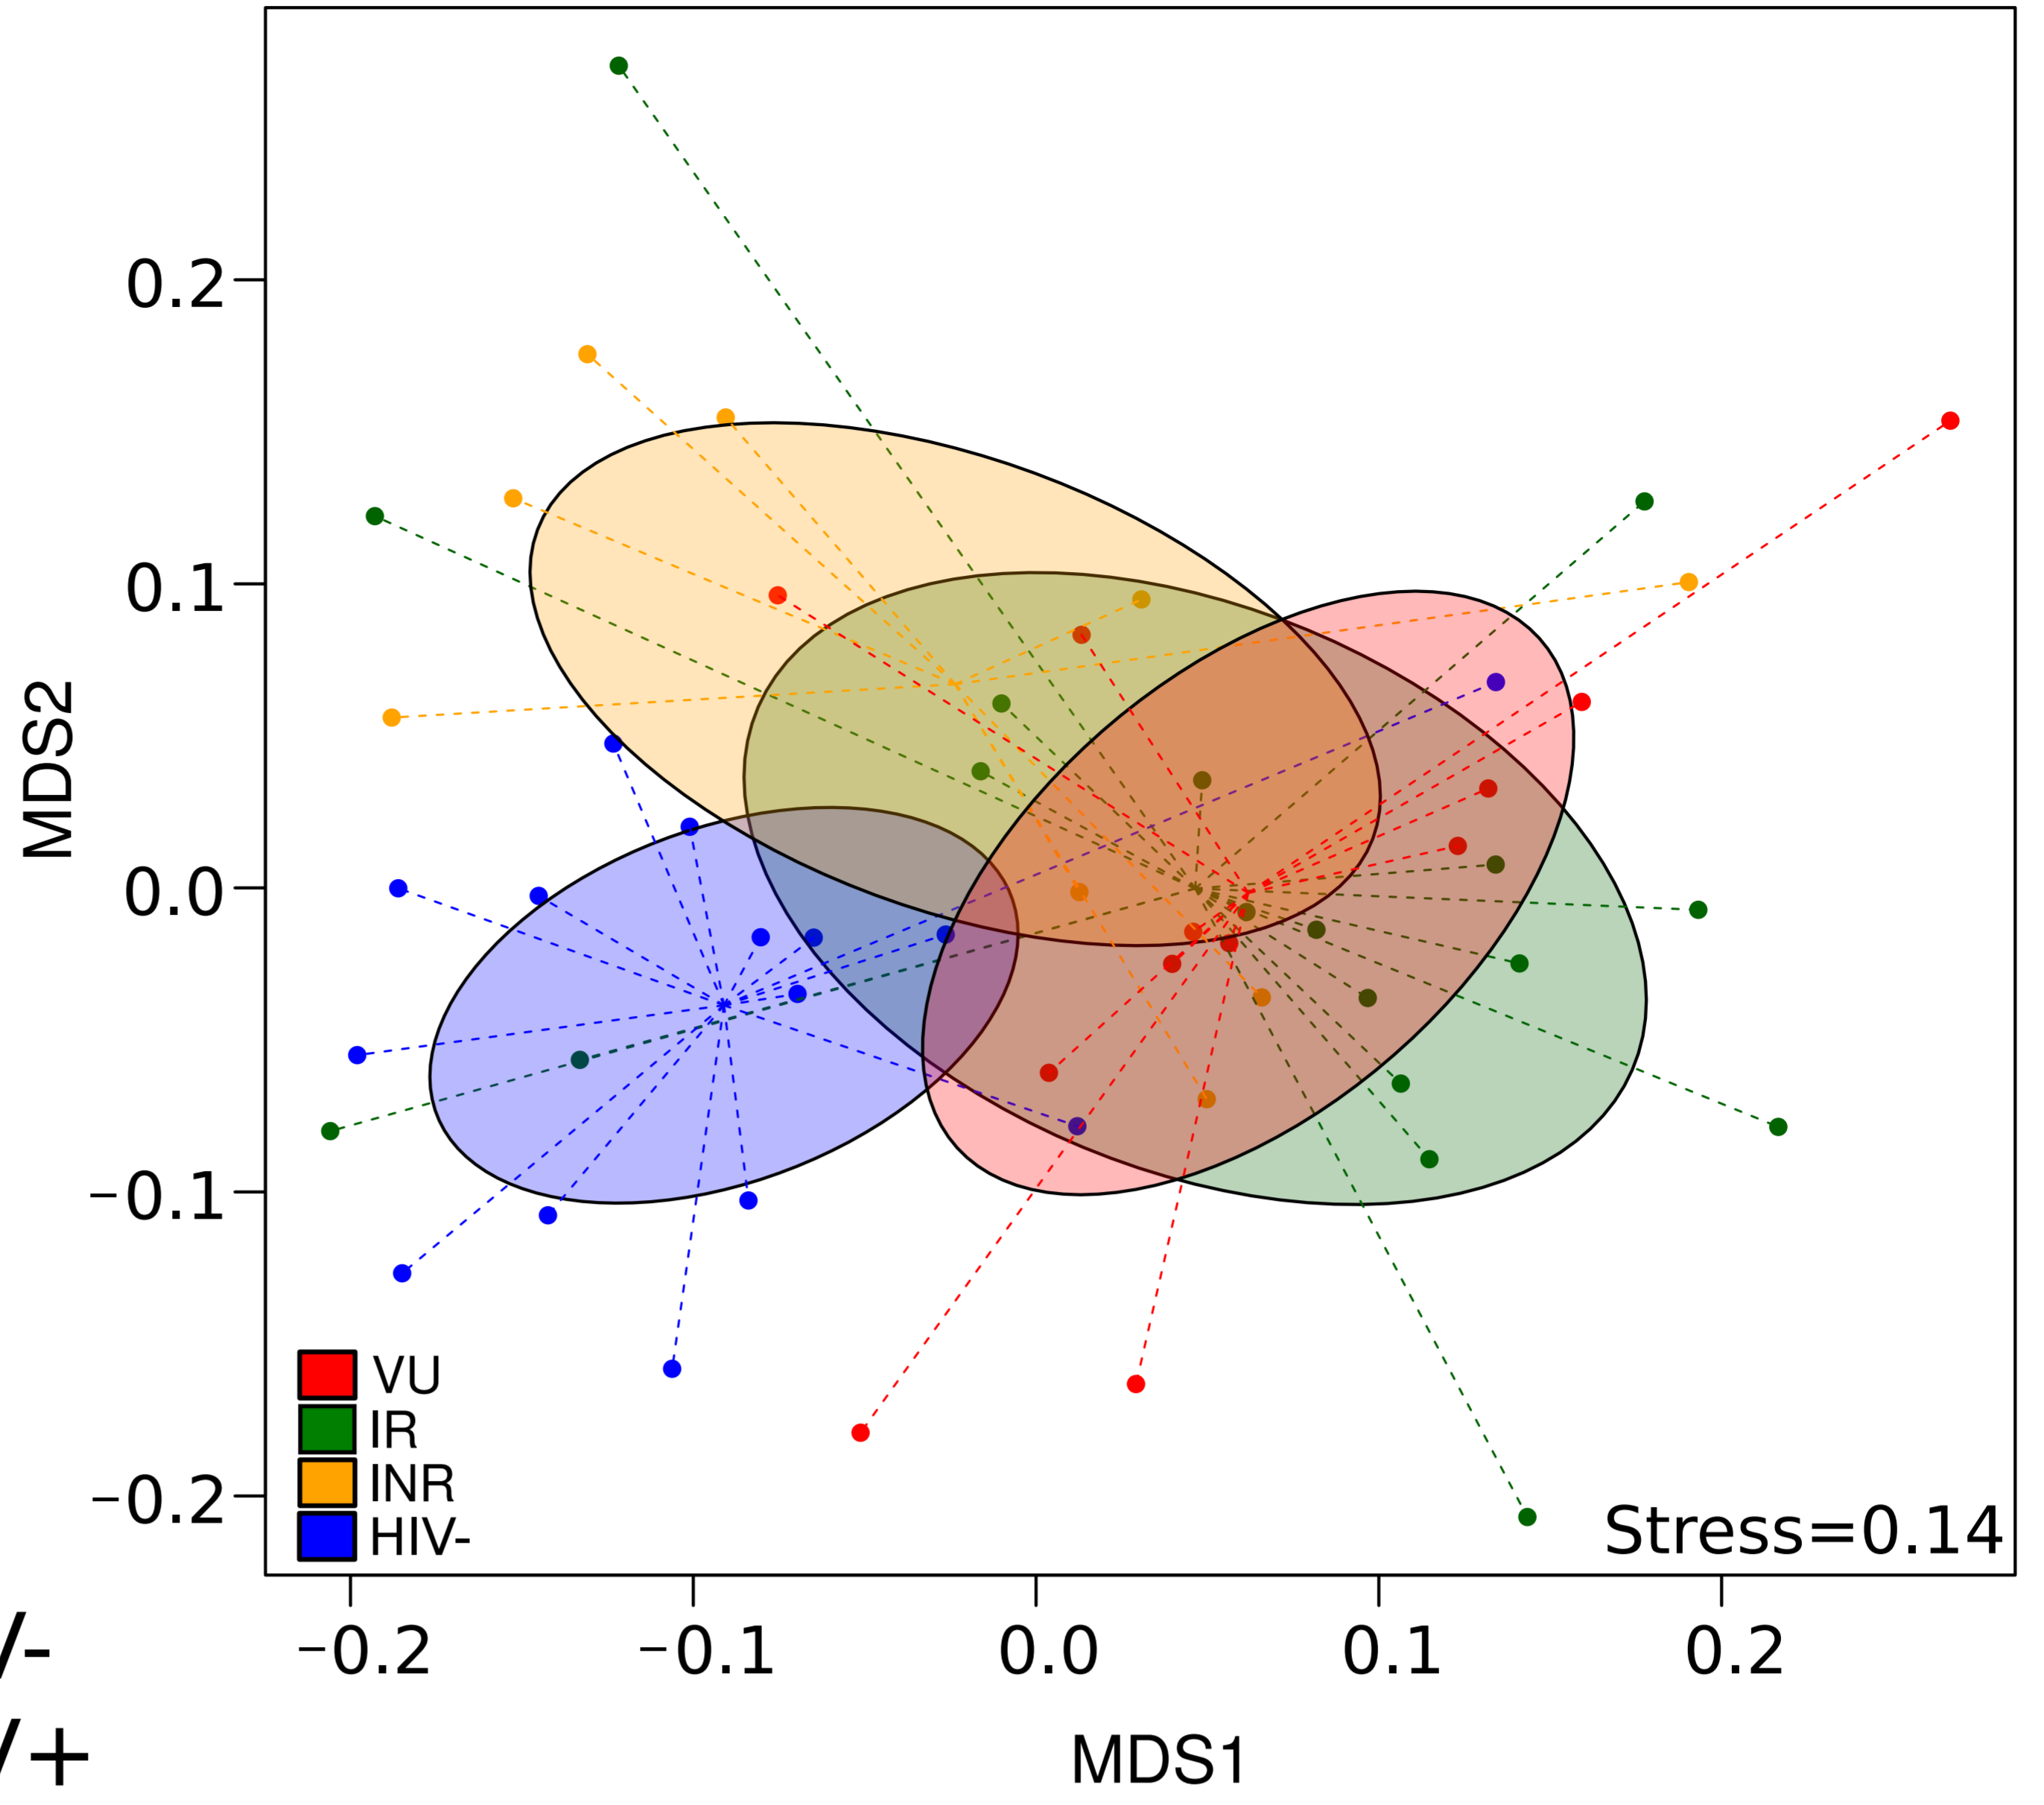

b

## HIV- vs HIV+ KO

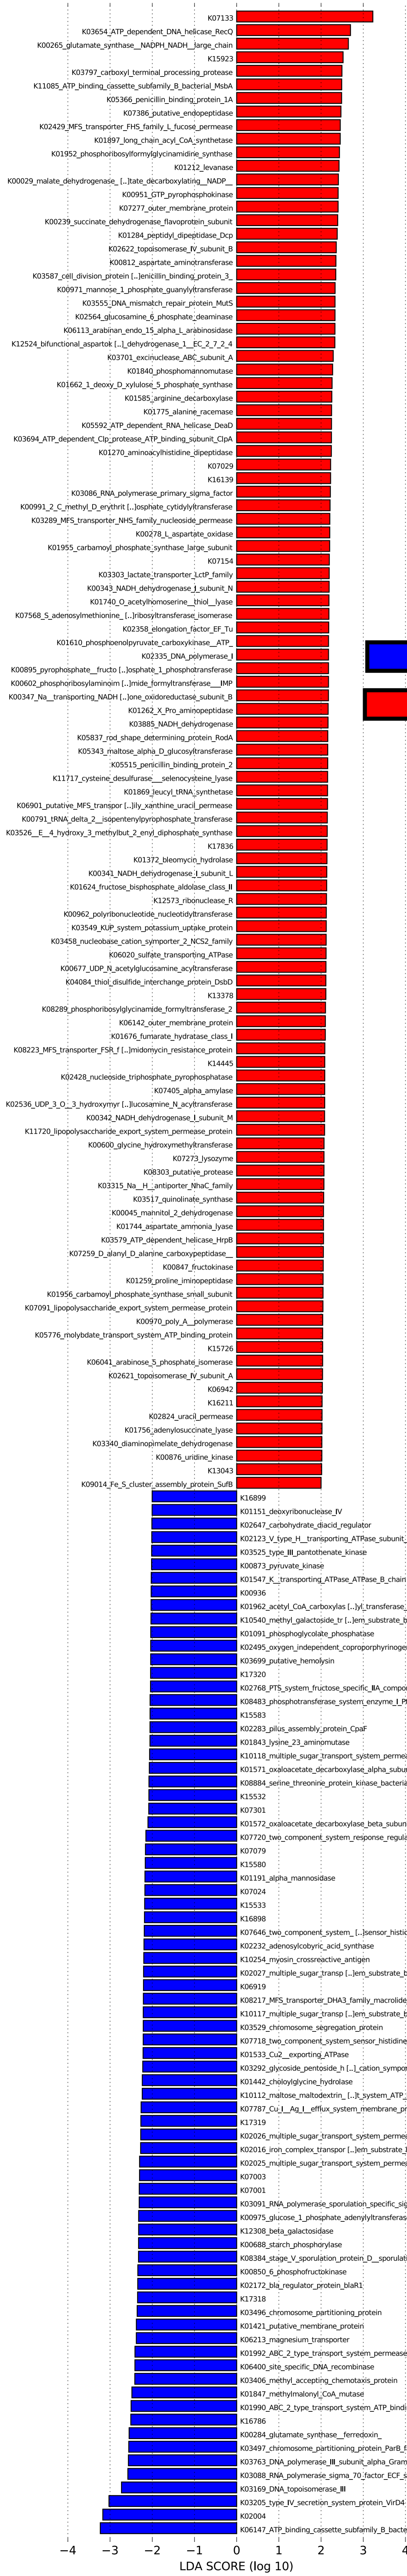

c

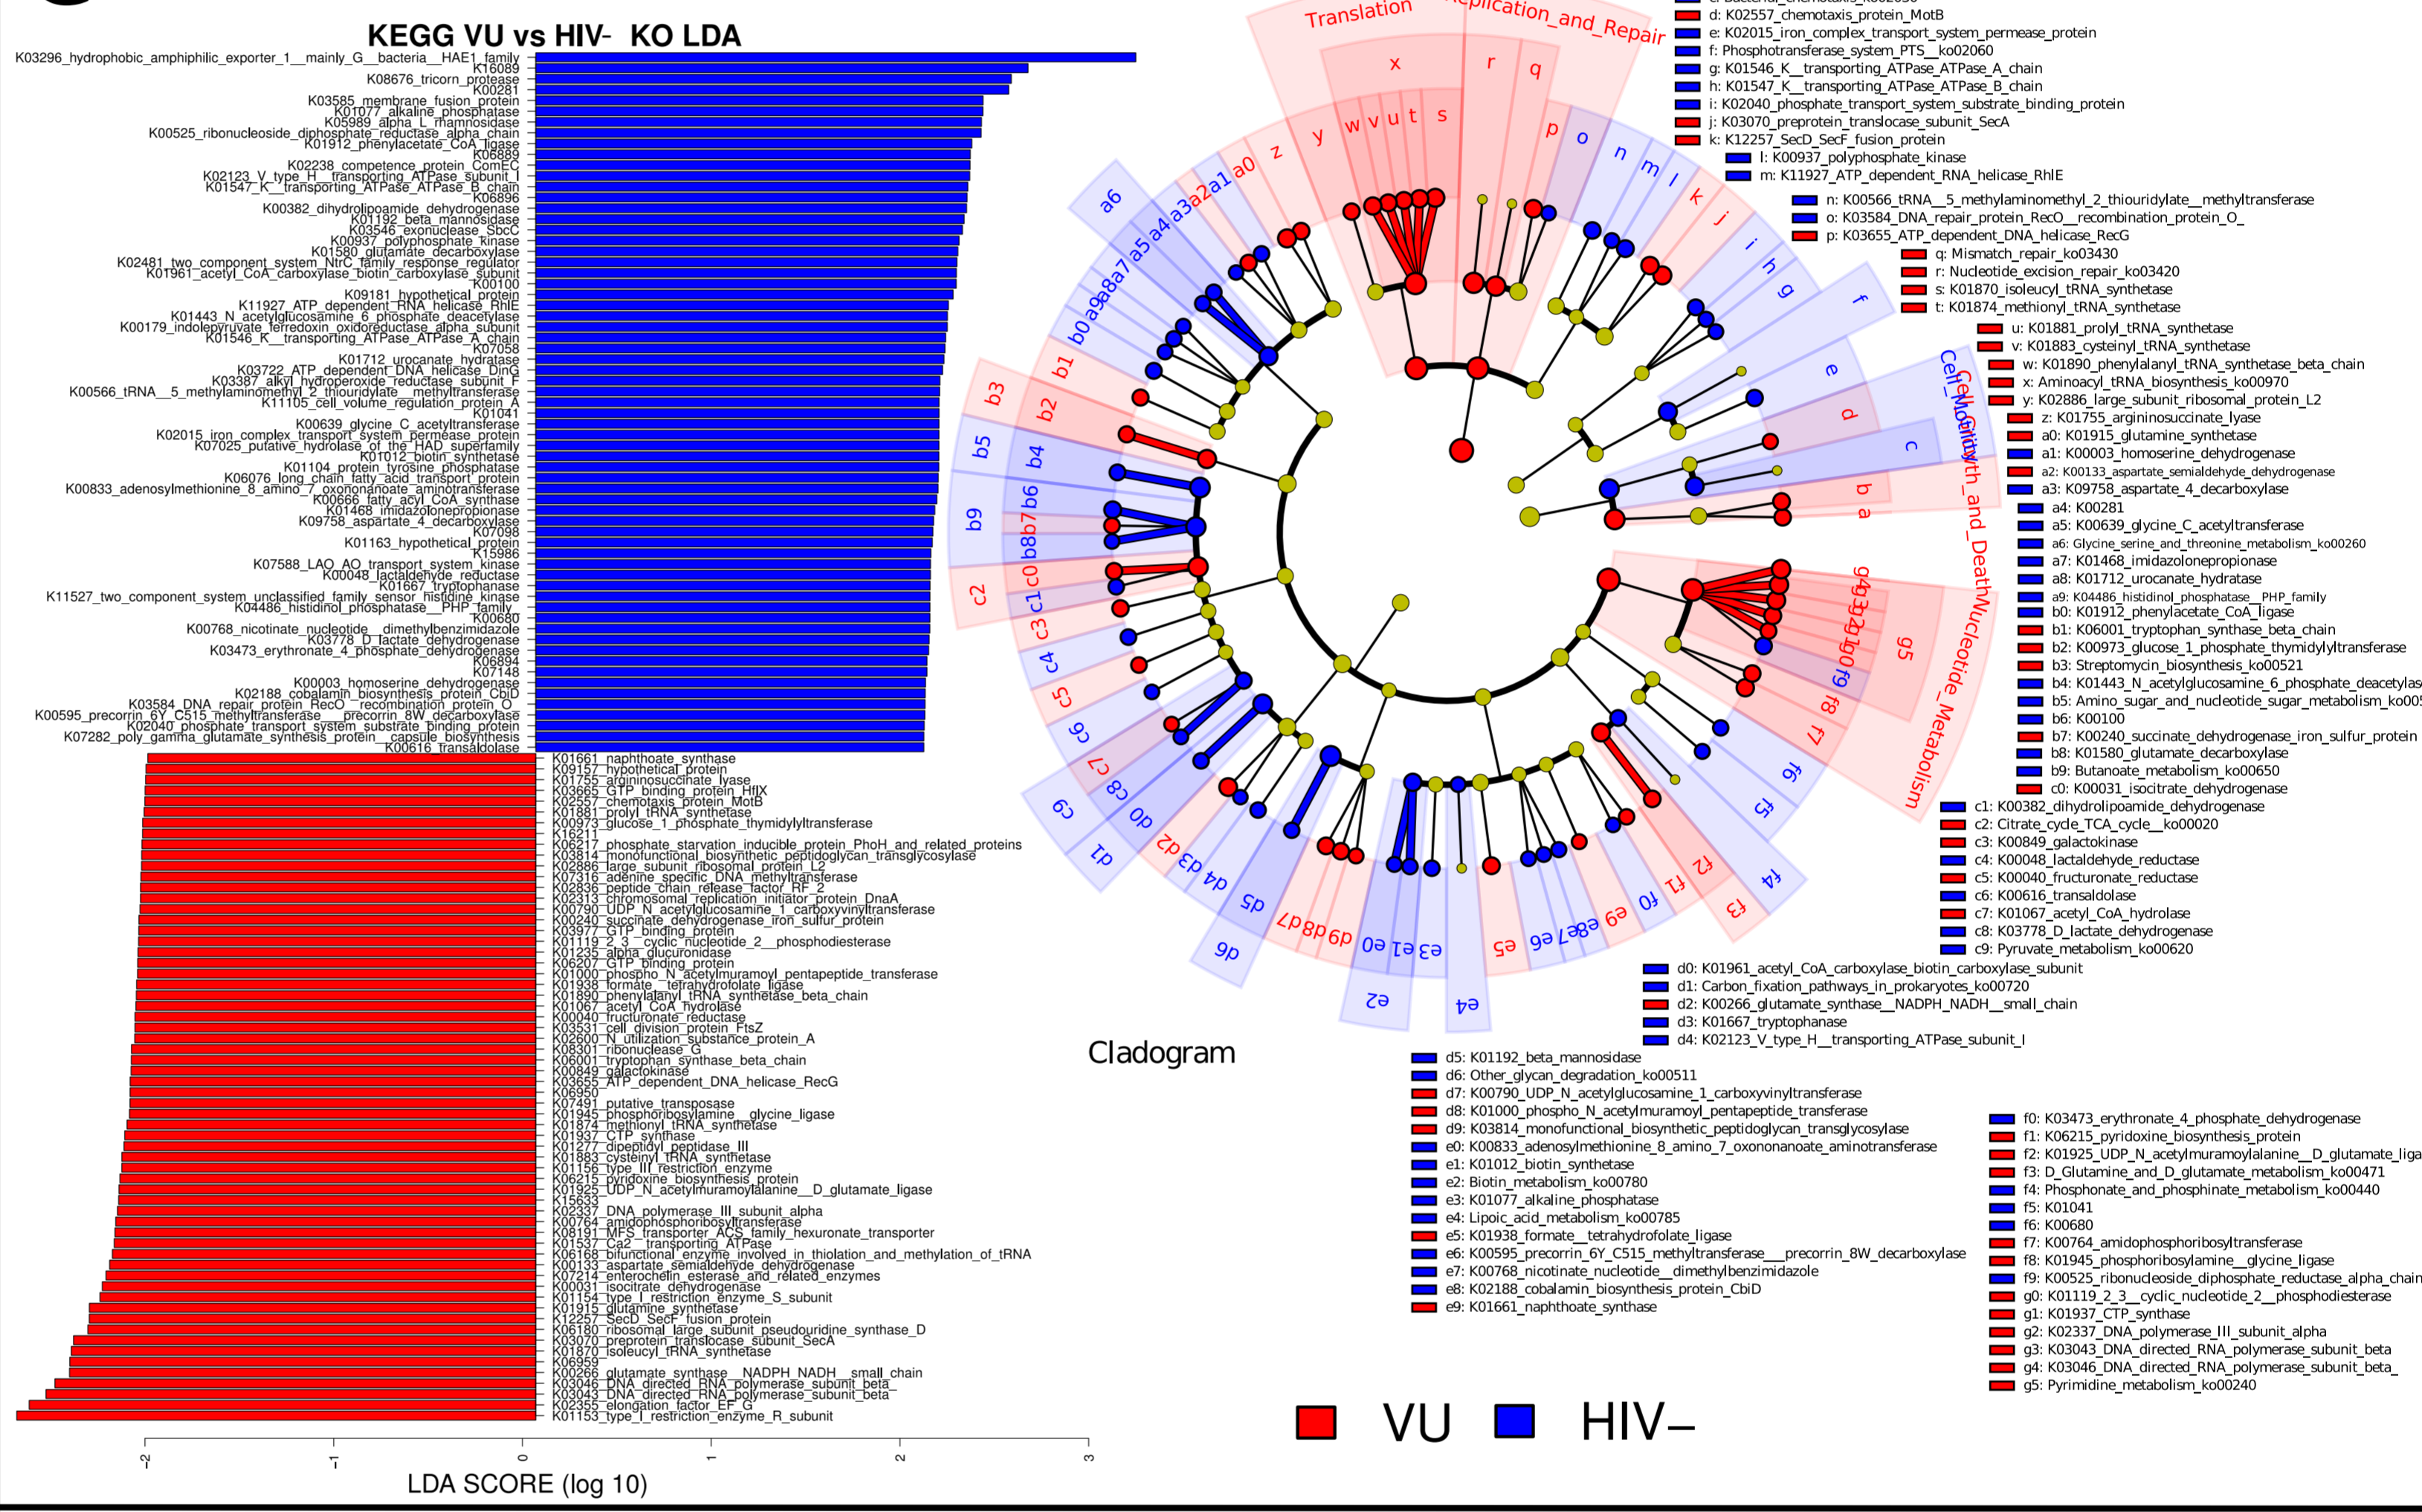

d

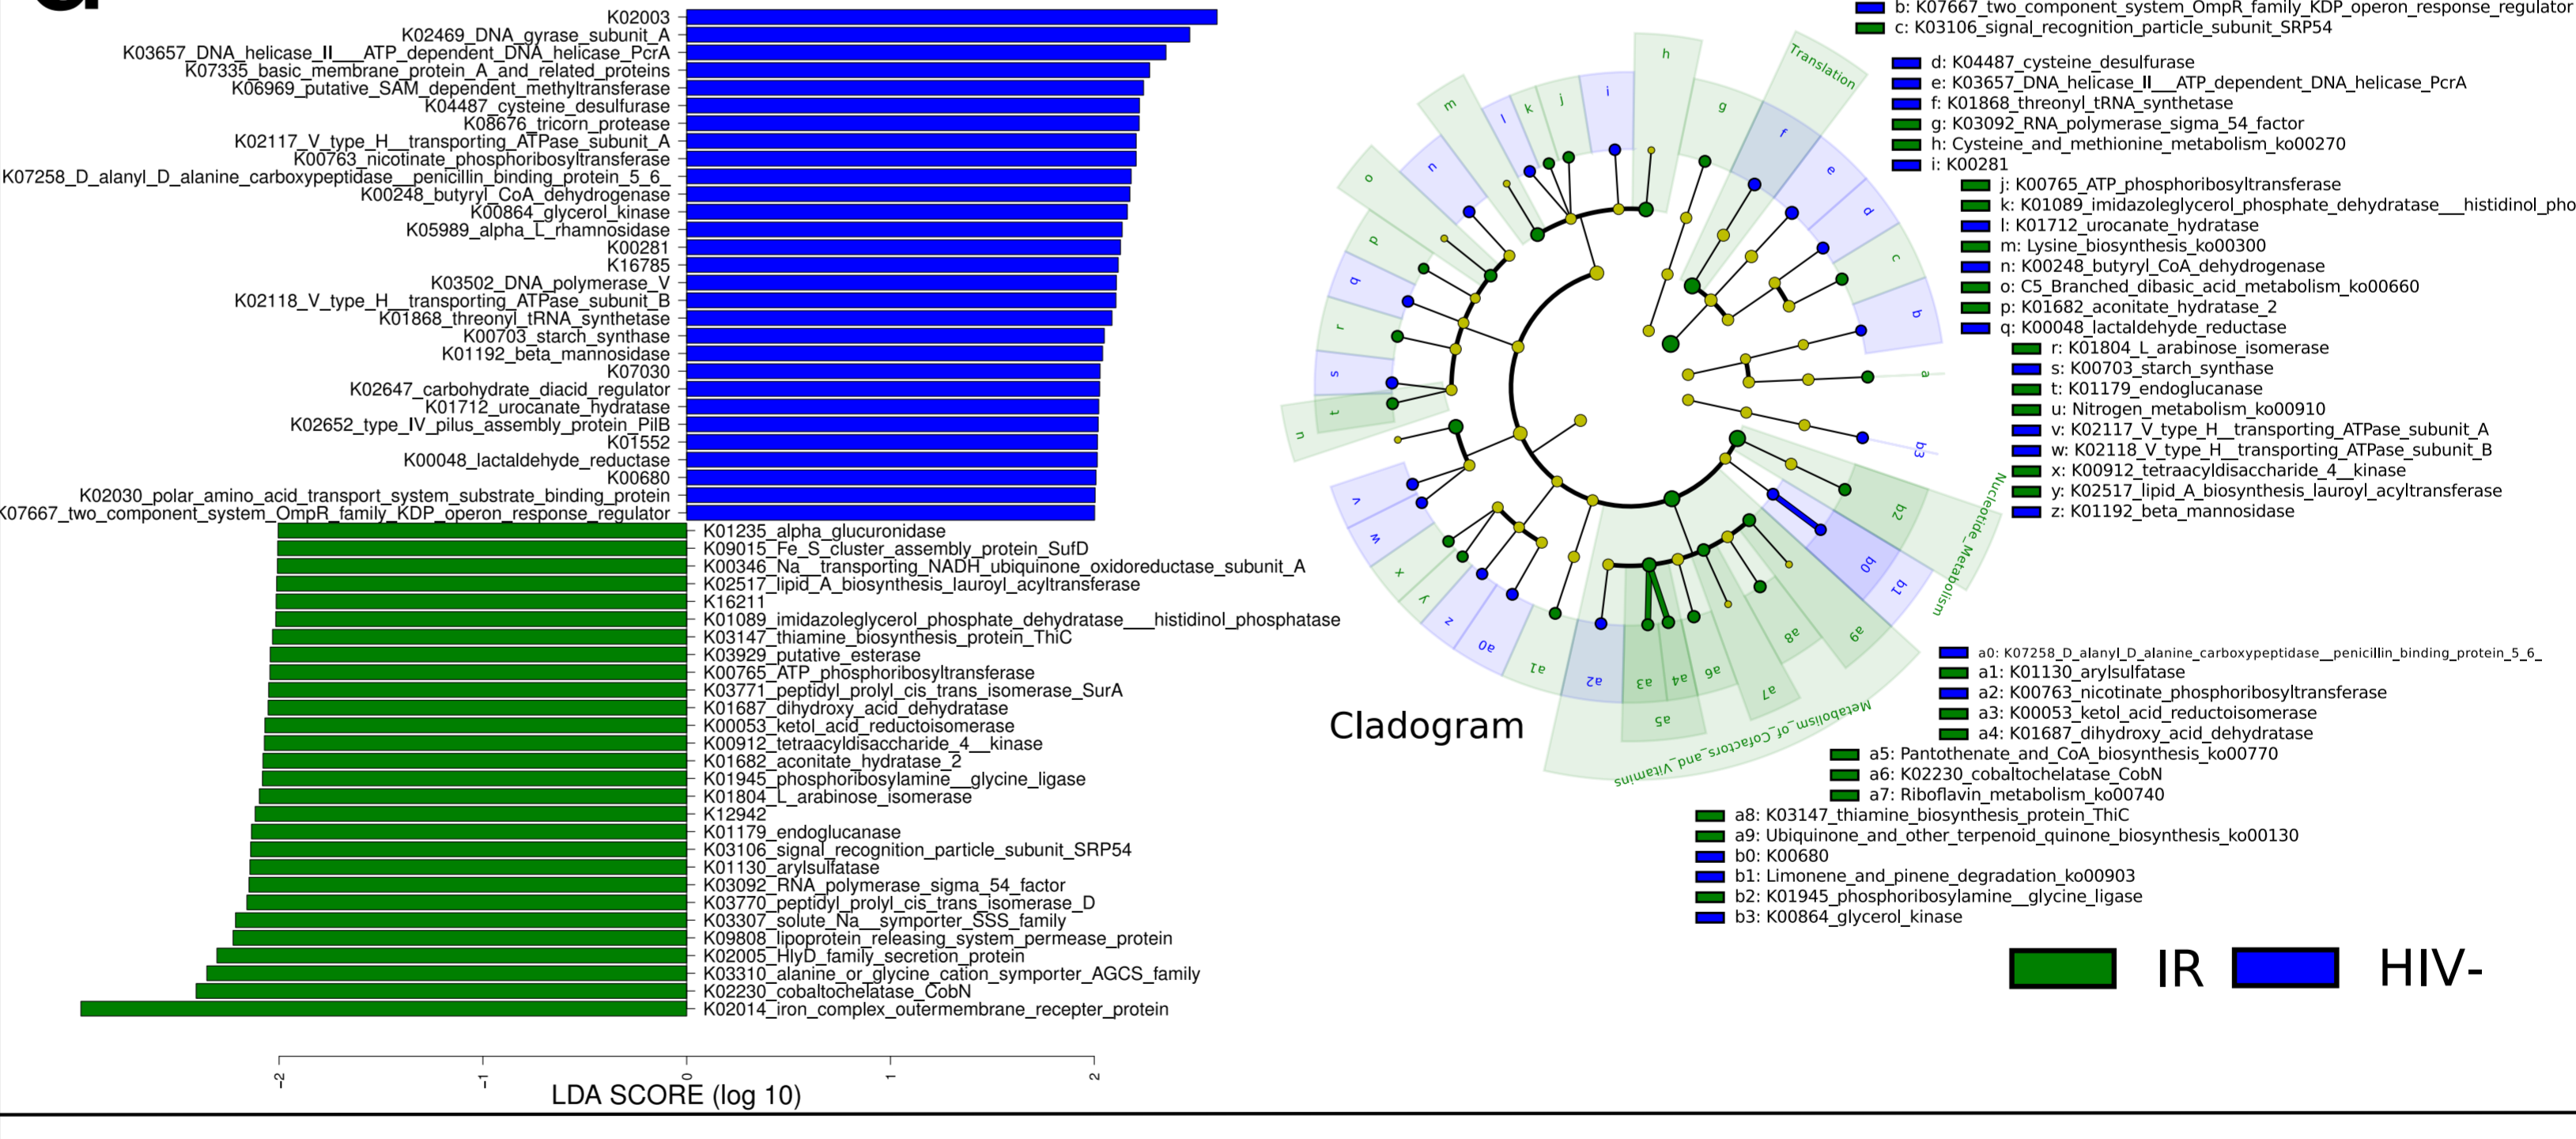

e

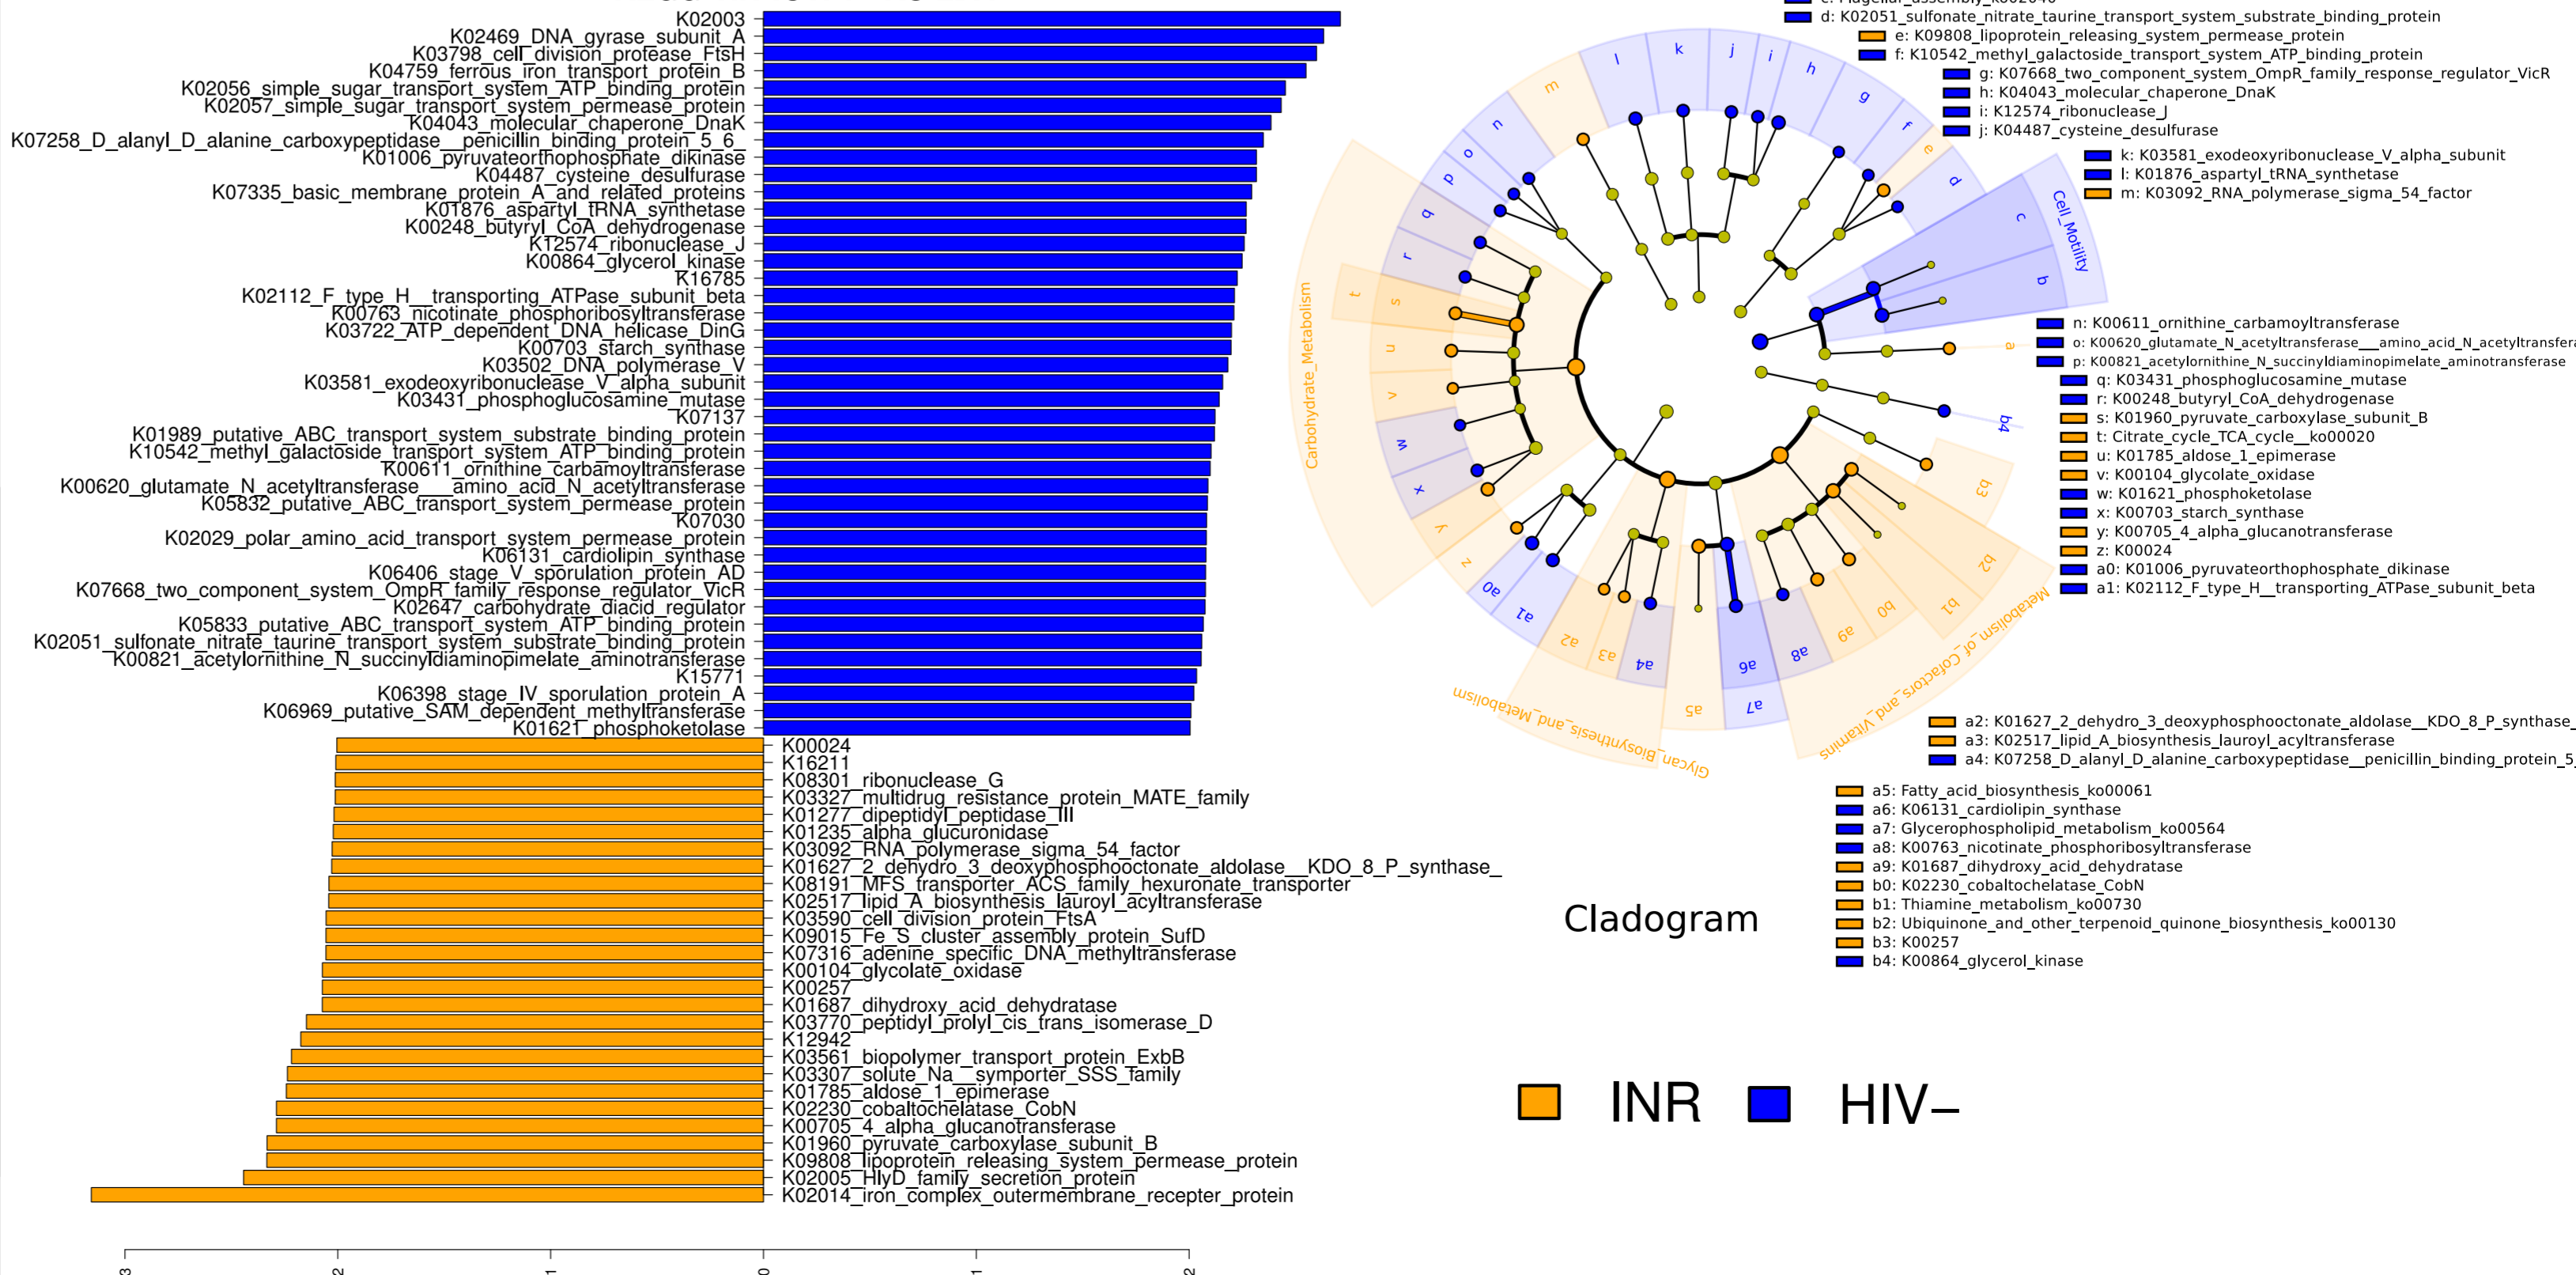

Supplement: 41396_2018_151_MOESM2_ESM.pdf [file 41396_2018_151_MOESM2_ESM.pdf]

# Species HIV+ vs HIV- LDA

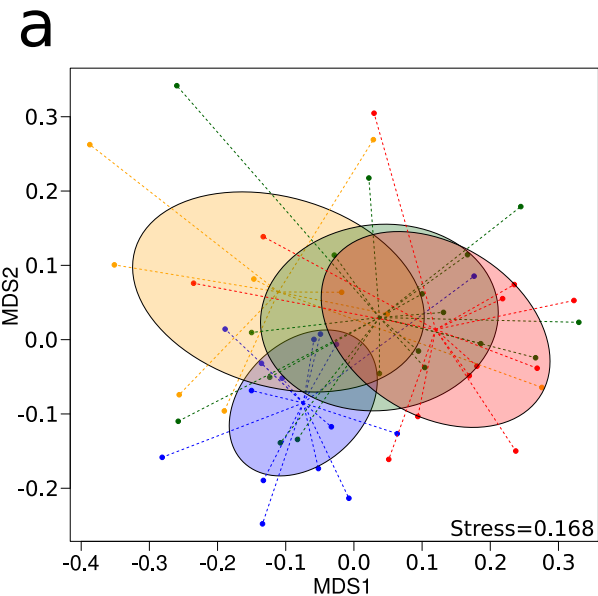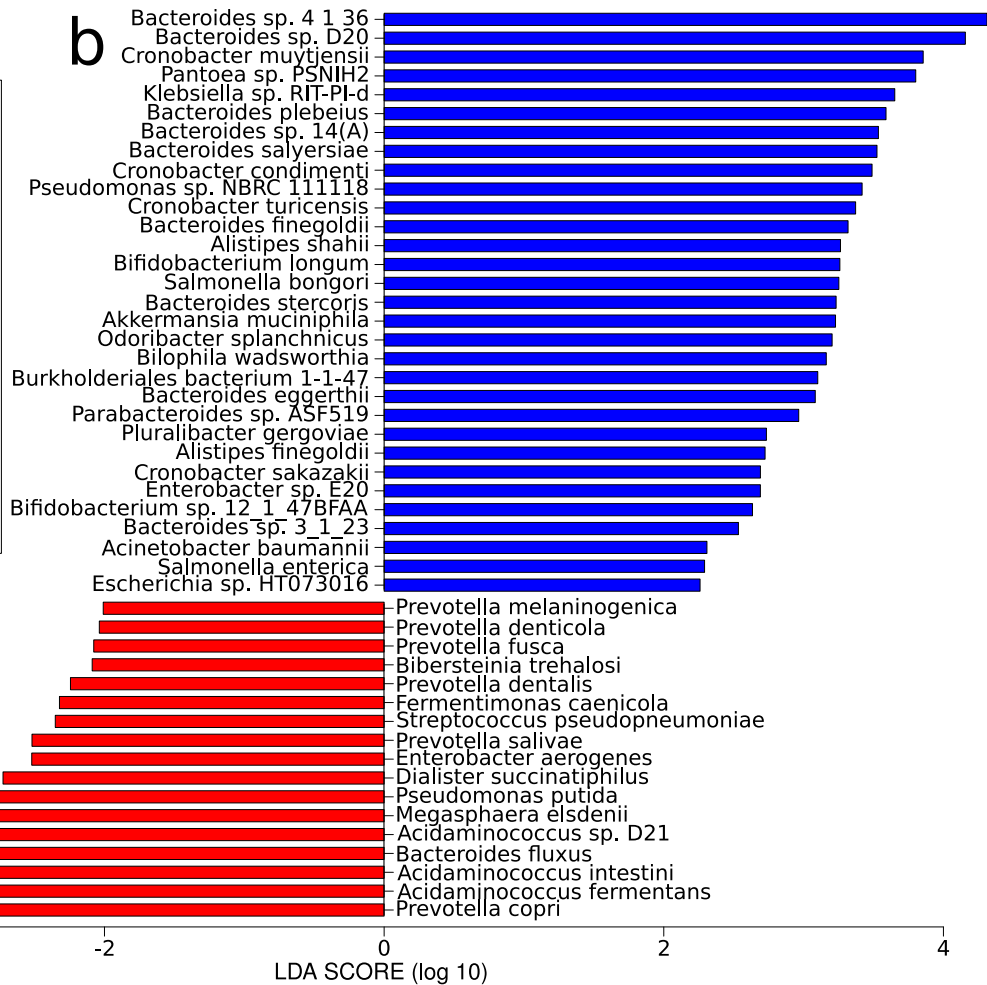

 HIV-  
 HIV+

Supplement: 41396_2018_151_MOESM3_ESM.pdf [file 41396_2018_151_MOESM3_ESM.pdf]

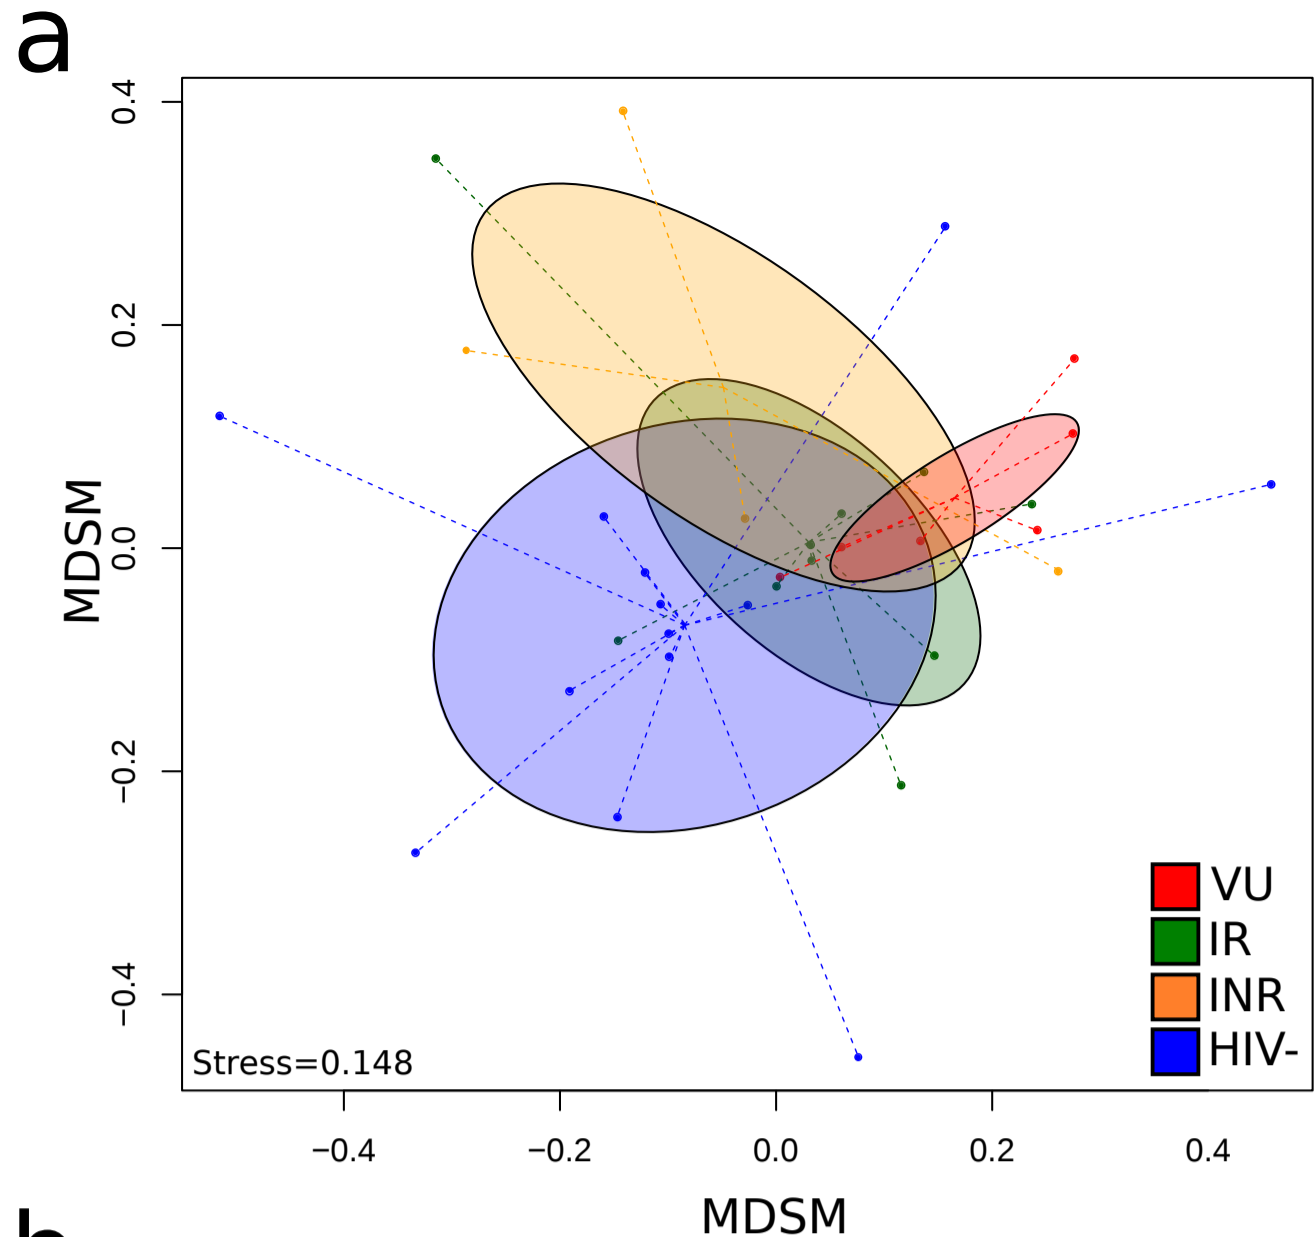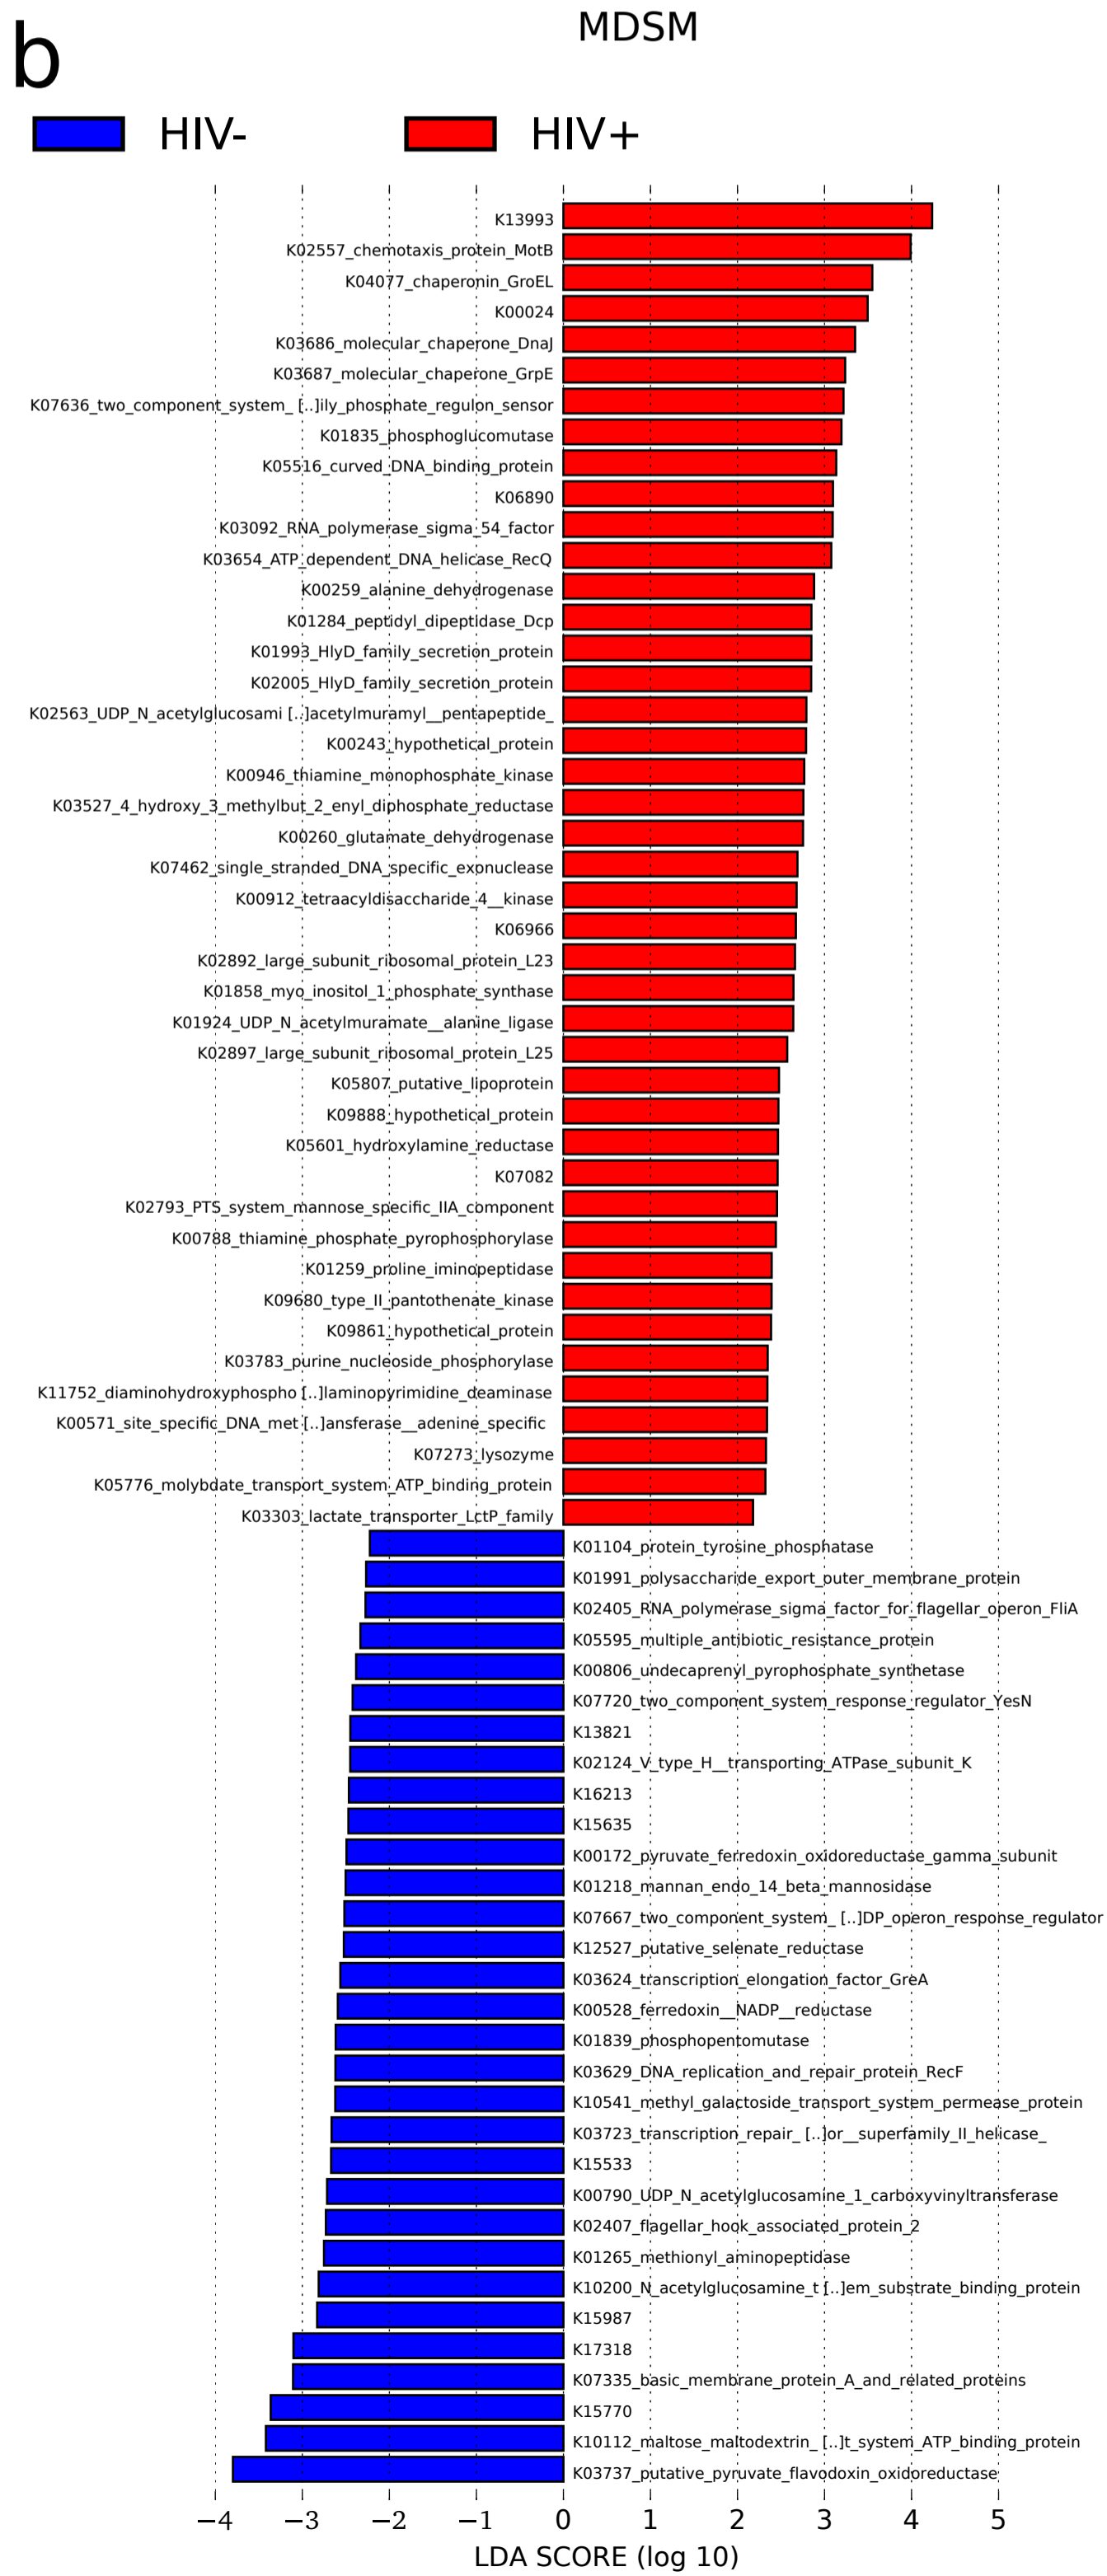

Supplement: 41396_2018_151_MOESM4_ESM.pdf [file 41396_2018_151_MOESM4_ESM.pdf]

a

## Genus abundance DNA

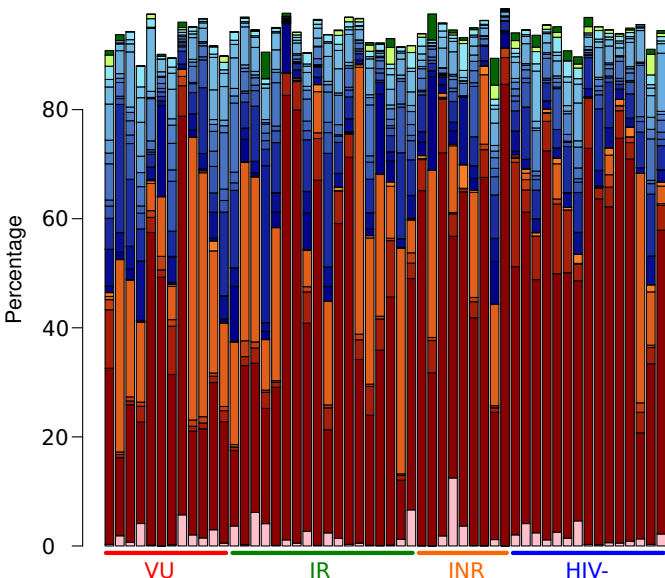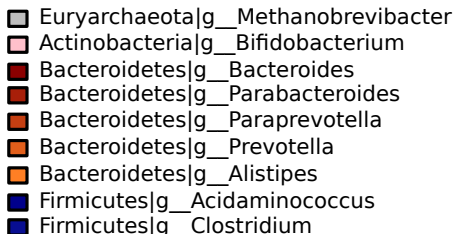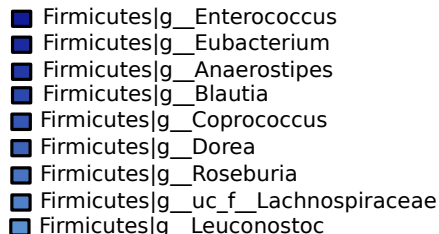

b

## Genus abundance RNA

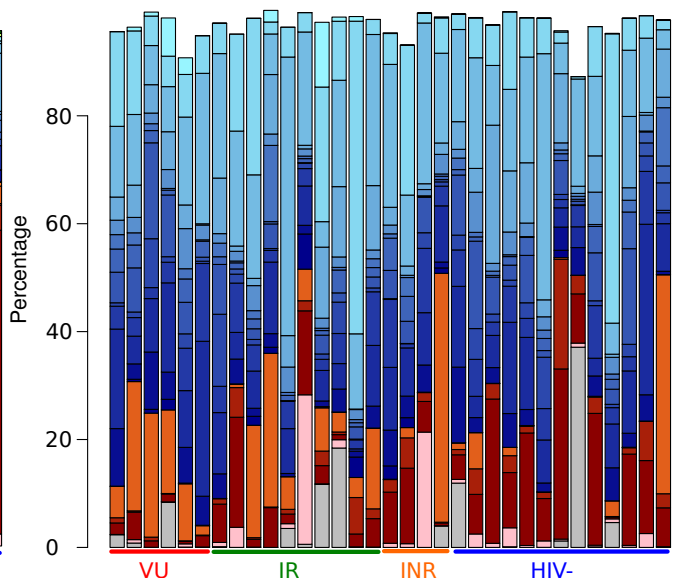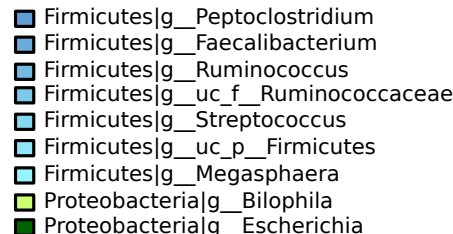

Supplement: 41396_2018_151_MOESM5_ESM.pdf [file 41396_2018_151_MOESM5_ESM.pdf]

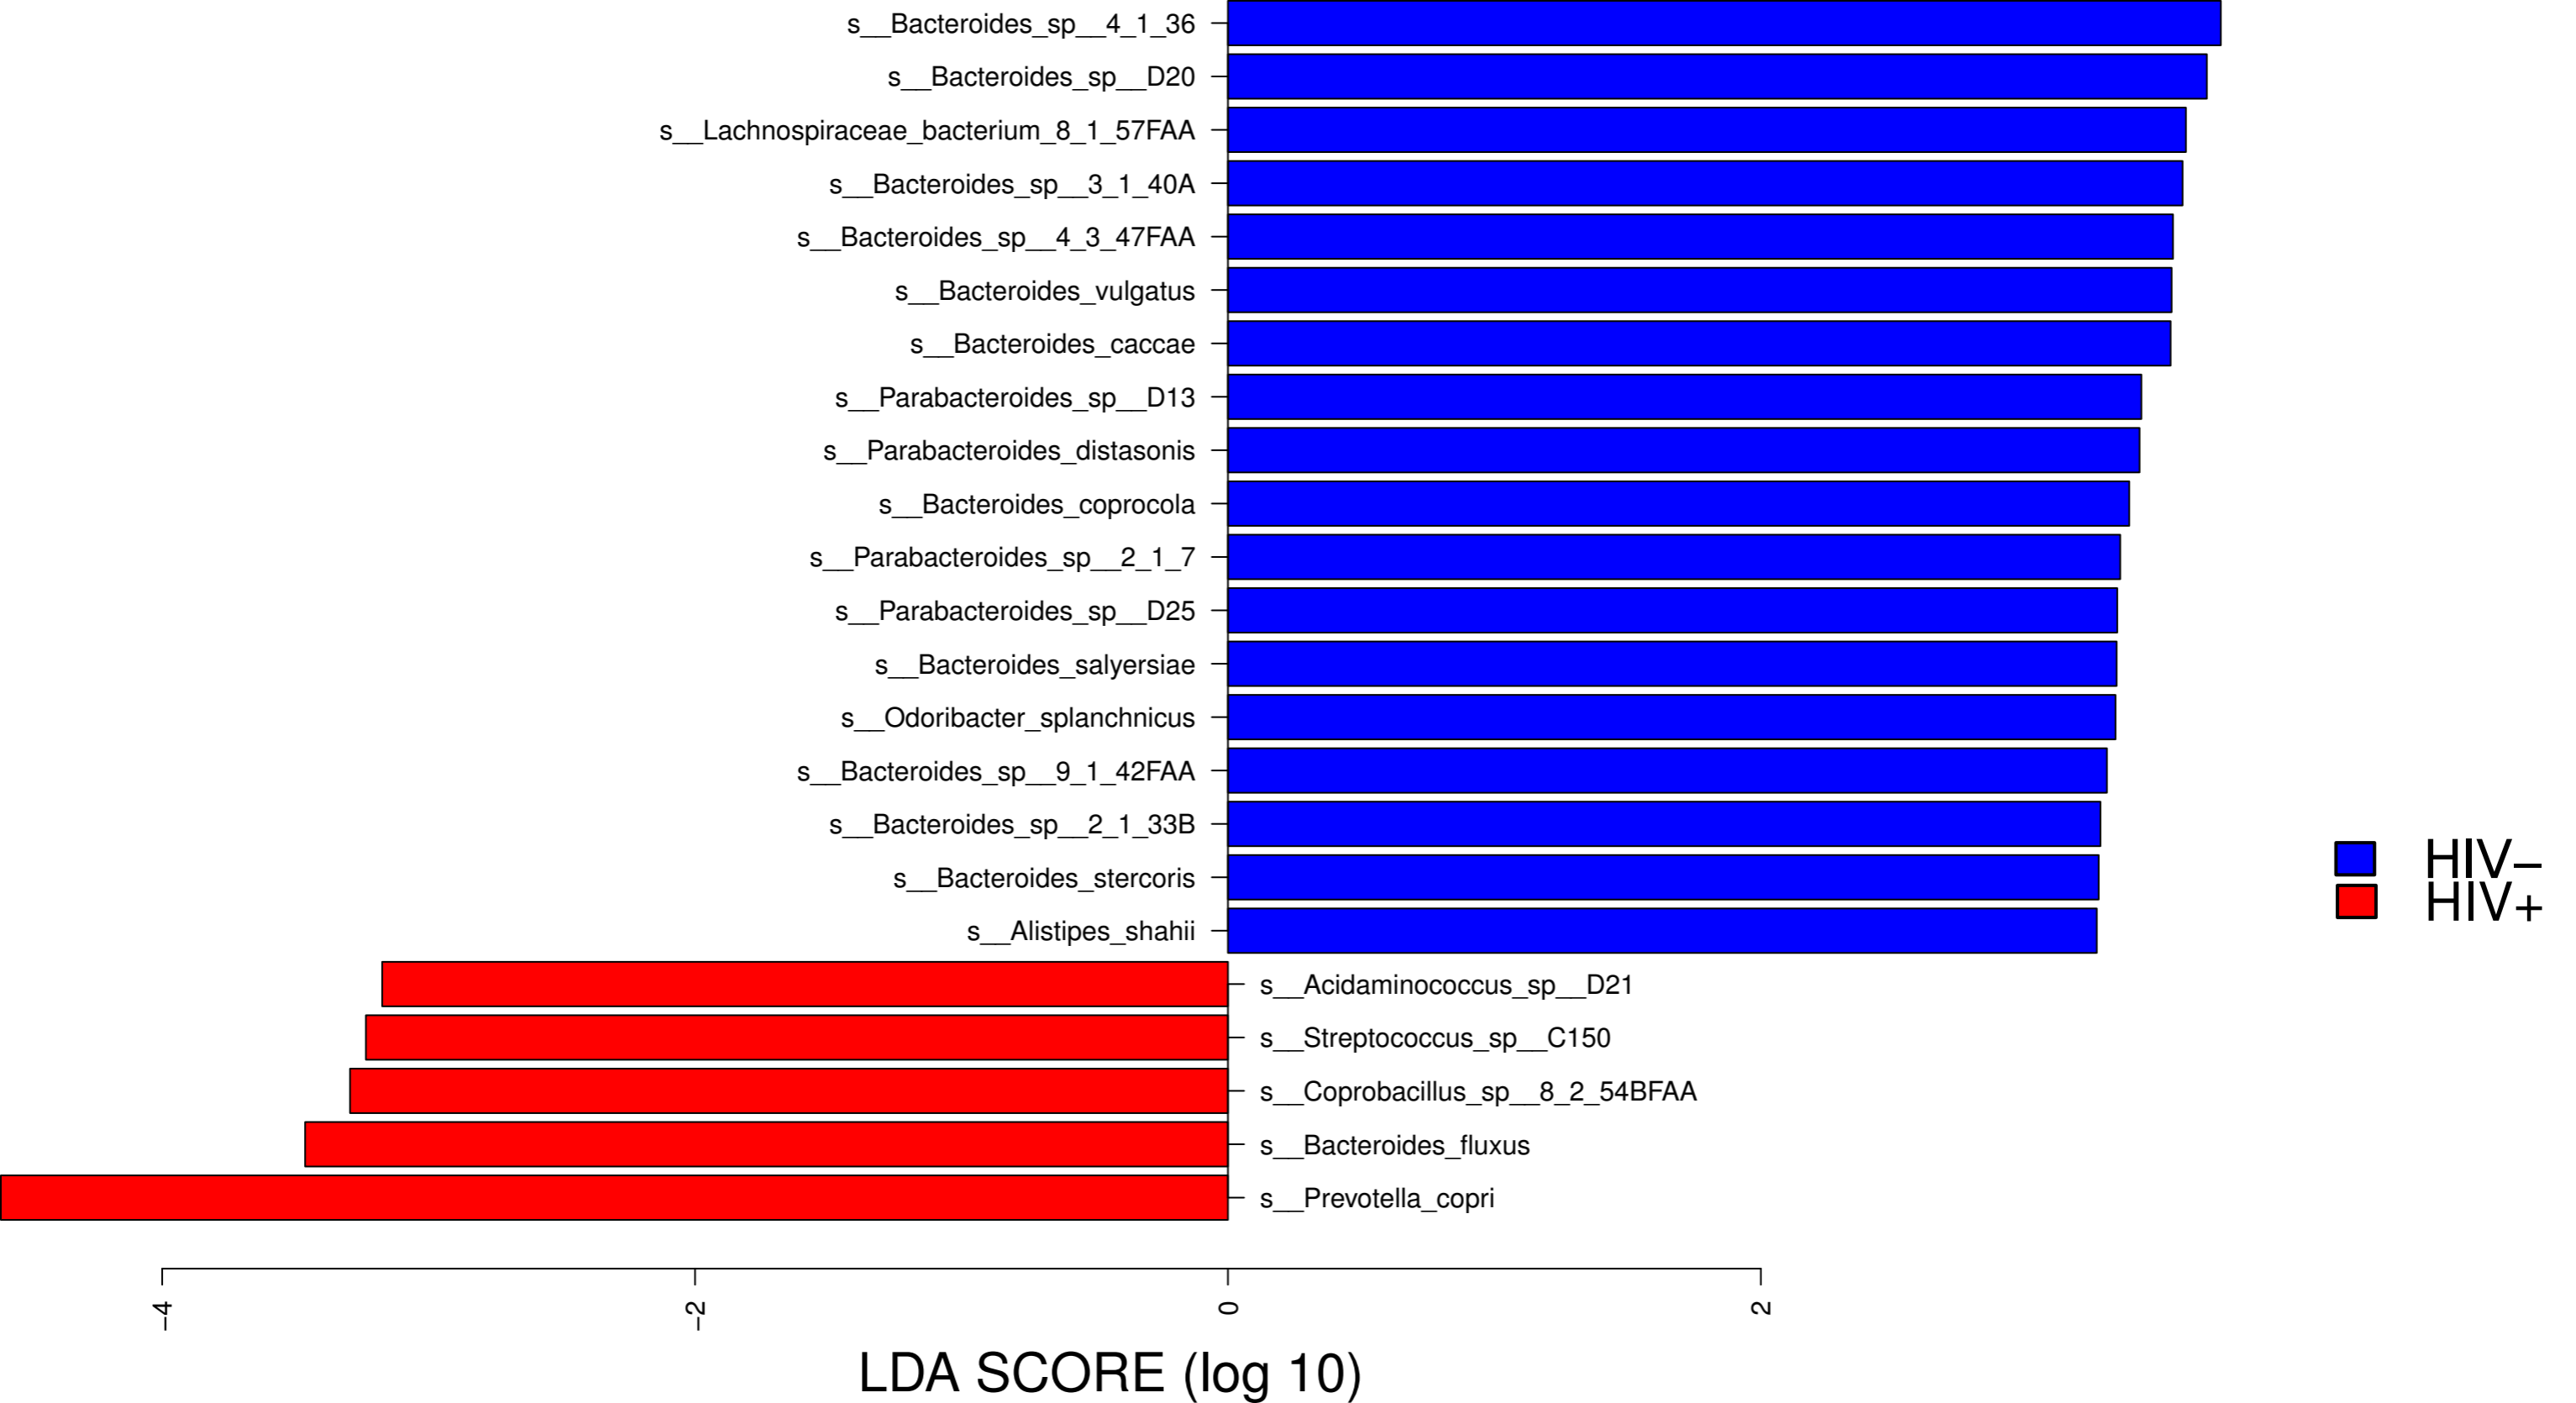

Supplement: 41396_2018_151_MOESM6_ESM.pdf [file 41396_2018_151_MOESM6_ESM.pdf]

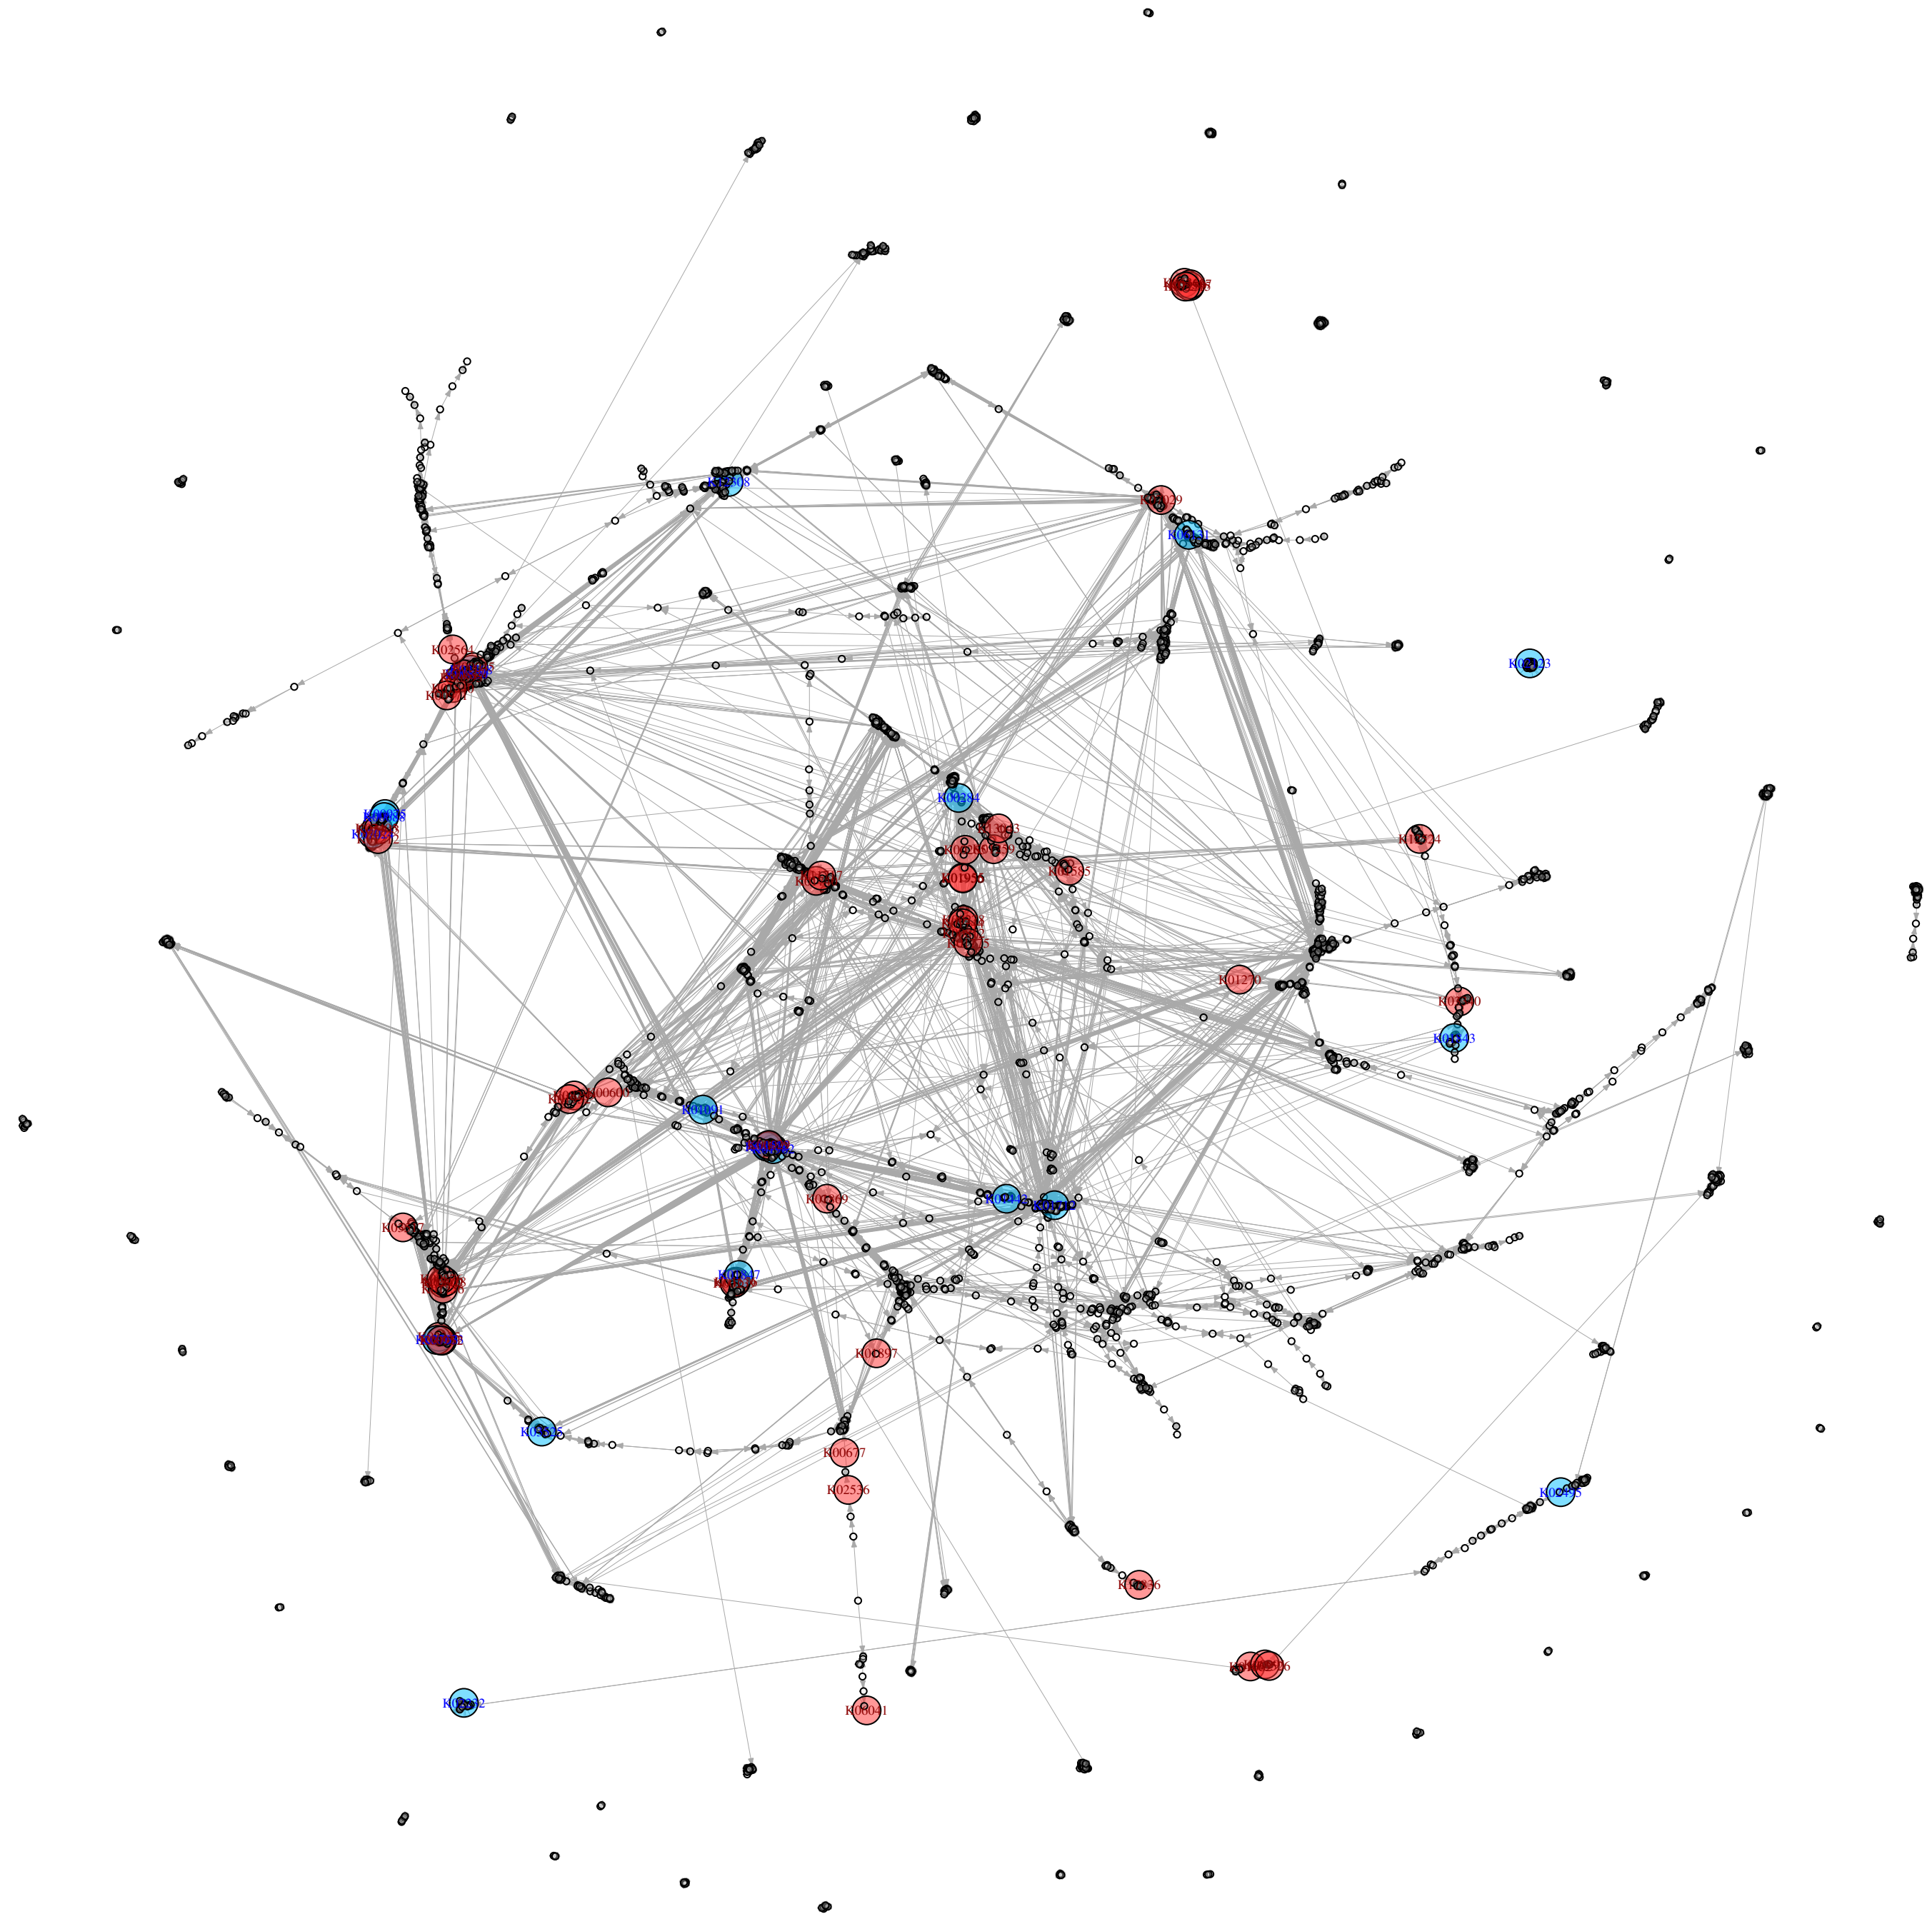

Supplement: 41396_2018_151_MOESM8_ESM.pdf [file 41396_2018_151_MOESM8_ESM.pdf]

# a Betweenness centrality

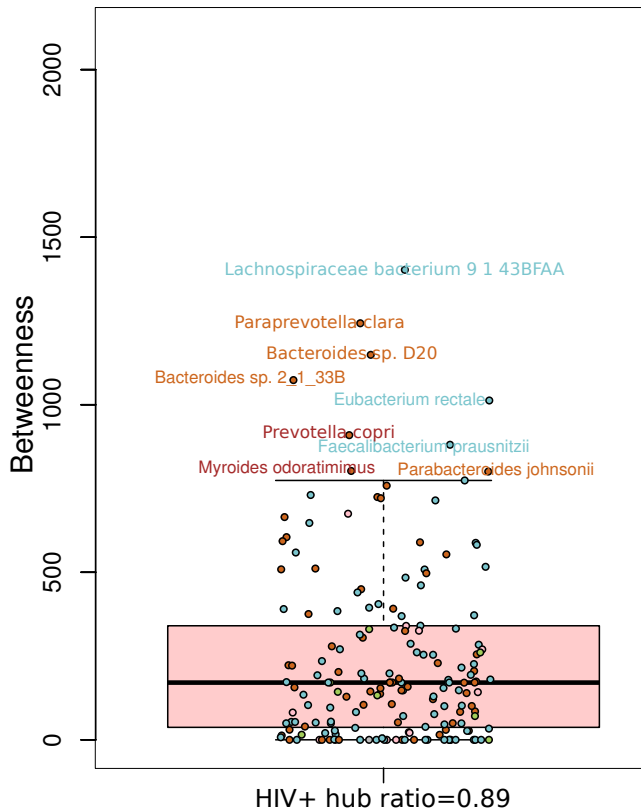

# b Eigenvector centrality

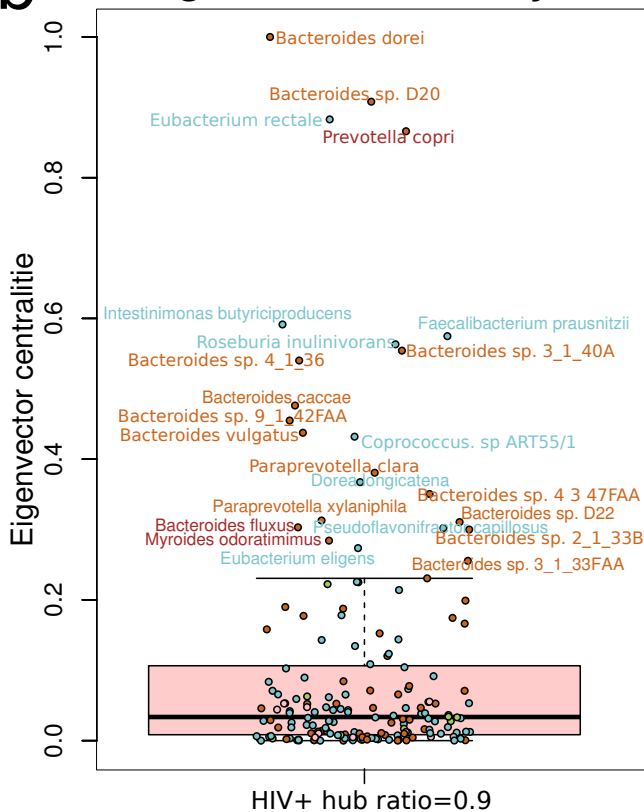

Supplement: 41396_2018_151_MOESM9_ESM.pdf [file 41396_2018_151_MOESM9_ESM.pdf]
